# Supplementary material for: Pseudohelicene chemosensor displaying ternary signaling stimulated by hydrostatic pressure and solvent
Source: Royal Society of Chemistry journal article supplement (doi:10.1039/d4cc05652c), 2024-12-02
Supplement: d4cc05652c1.pdf [file d4cc05652c1.pdf]

*Electronic Supplementary Information*  
*for*

**Pseudohelicene chemosensor displaying ternary signaling stimulated by  
hydrostatic pressure and solvent**

**Tomokazu Kinoshita, Kota Watanabe, Eiji Tsurumaki, Shinji Toyota\* and  
Gaku Fukuhara\***

*Department of Chemistry, Institute of Science Tokyo, 2-12-1 Ookayama, Meguro-ku, Tokyo 152-  
8551, Japan*

E-mail: stoyota@chem.titech.ac.jp (S.T.), gaku@chem.titech.ac.jp (G.F.)

## Experimental Section

**Materials.** All commercial reagents and solvents were used without further purification. The sample solutions were dissolved in spectroscopic grade toluene, chloroform, dichloromethane (DCM), and methanol (MeOH). The target material (**[2]HA<sub>2</sub>**) was synthesized according to the literature.<sup>1</sup>

**Instruments.** UV/vis spectra were acquired by using a JASCO V-550 or V-770 spectrometer. Fluorescence spectra were acquired by using a JASCO FP-8500 spectrofluorometer. The absolute fluorescence quantum yields at 0.1 MPa ( $\Phi_{F,0.1 \text{ MPa}}$ ) were evaluated using a spectrofluorometer (FP-8500) fitted with an integrating sphere. Fluorescence lifetime decays were obtained using a Hamamatsu Quantaurus-Tau single-photon counting apparatus with an LED light source ( $\lambda_{\text{ex}} = 405 \text{ nm}$ ); photons were collected up to 10000 counts.

**Hydrostatic pressure spectroscopy.** The spectroscopic experiments under hydrostatic pressure were conducted using a custom-built high-pressure apparatus; the details are summarized in our previous publications.<sup>2,3</sup> In this apparatus (Figure S1), a quartz inner cell (2 mm path length) with a Teflon tube was filled with the sample solution. The cell was set into the outer cell, which was filled with H<sub>2</sub>O that can be hydrostatically pressurized by a hand pump. The outer cell was placed in the spectrometers, enabling acquisition of the hydrostatic pressure spectroscopy data (range: 0.1–400 MPa) through the sapphire windows.

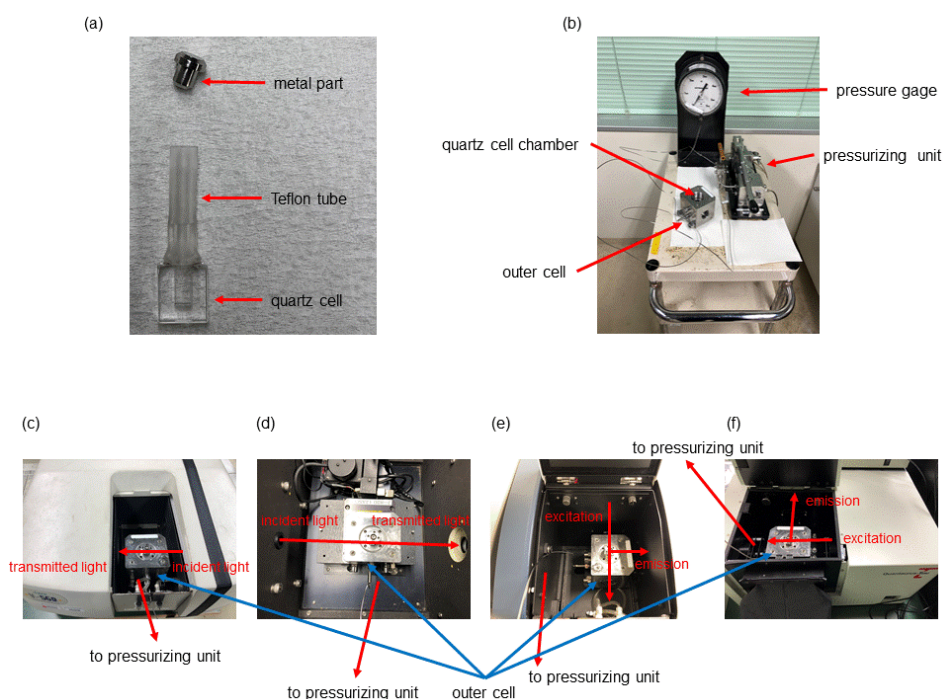

**Figure S1.** Photographs of (a) inner quartz cell, (b) pressurizing units, and setup for (c) UV/vis, (d) circular dichroism, (e) fluorescence, and (f) lifetime measurements. Reproduced with permission from Ref. 3. Copyright 2020, John Wiley & Sons.

<sup>1</sup> K. Watanabe, E. Tsurumaki, M. Hasegawa and S. Toyota, *Chem. Eur. J.* 2024, **30**, e202400929.

<sup>2</sup> H. Mizuno and G. Fukuhara, *Acc. Chem. Res.* 2022, **55**, 1748–1762.

<sup>3</sup> H. Mizuno, M. Kitamatsu, Y. Imai and G. Fukuhara, *ChemPhotoChem* 2020, **4**, 502–507.

## Characterization Data of [2]HA<sub>2</sub>

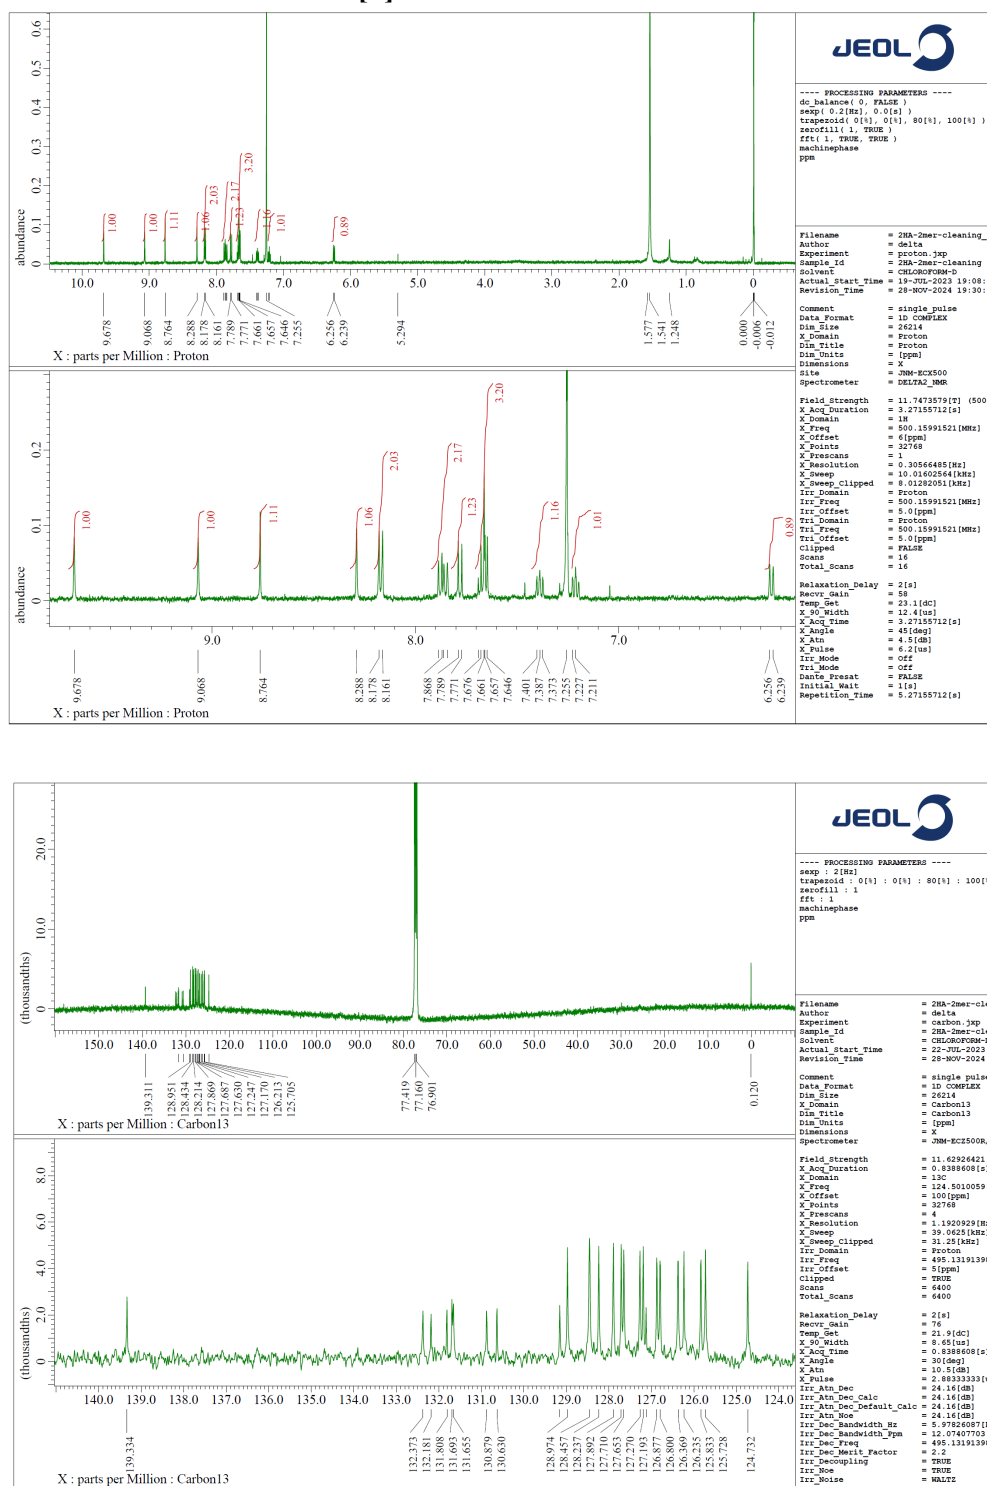

**Figure S2.** <sup>1</sup>H (top, 500 MHz, CDCl<sub>3</sub>) and <sup>13</sup>C NMR spectra (bottom, 125 MHz, CDCl<sub>3</sub>/CS<sub>2</sub> 10:1) of [2]HA<sub>2</sub>.

Compound data: mp 280–300 °C (dec.); *R<sub>f</sub>* 0.14 (hexane/CH<sub>2</sub>Cl<sub>2</sub> 5:1); HRMS (FAB): *m/z* calcd. for C<sub>52</sub>H<sub>30</sub> [*M*]<sup>+</sup>: 654.2348; found: 654.2394.

## Concentration-Dependent Optical Properties of [2]HA<sub>2</sub>

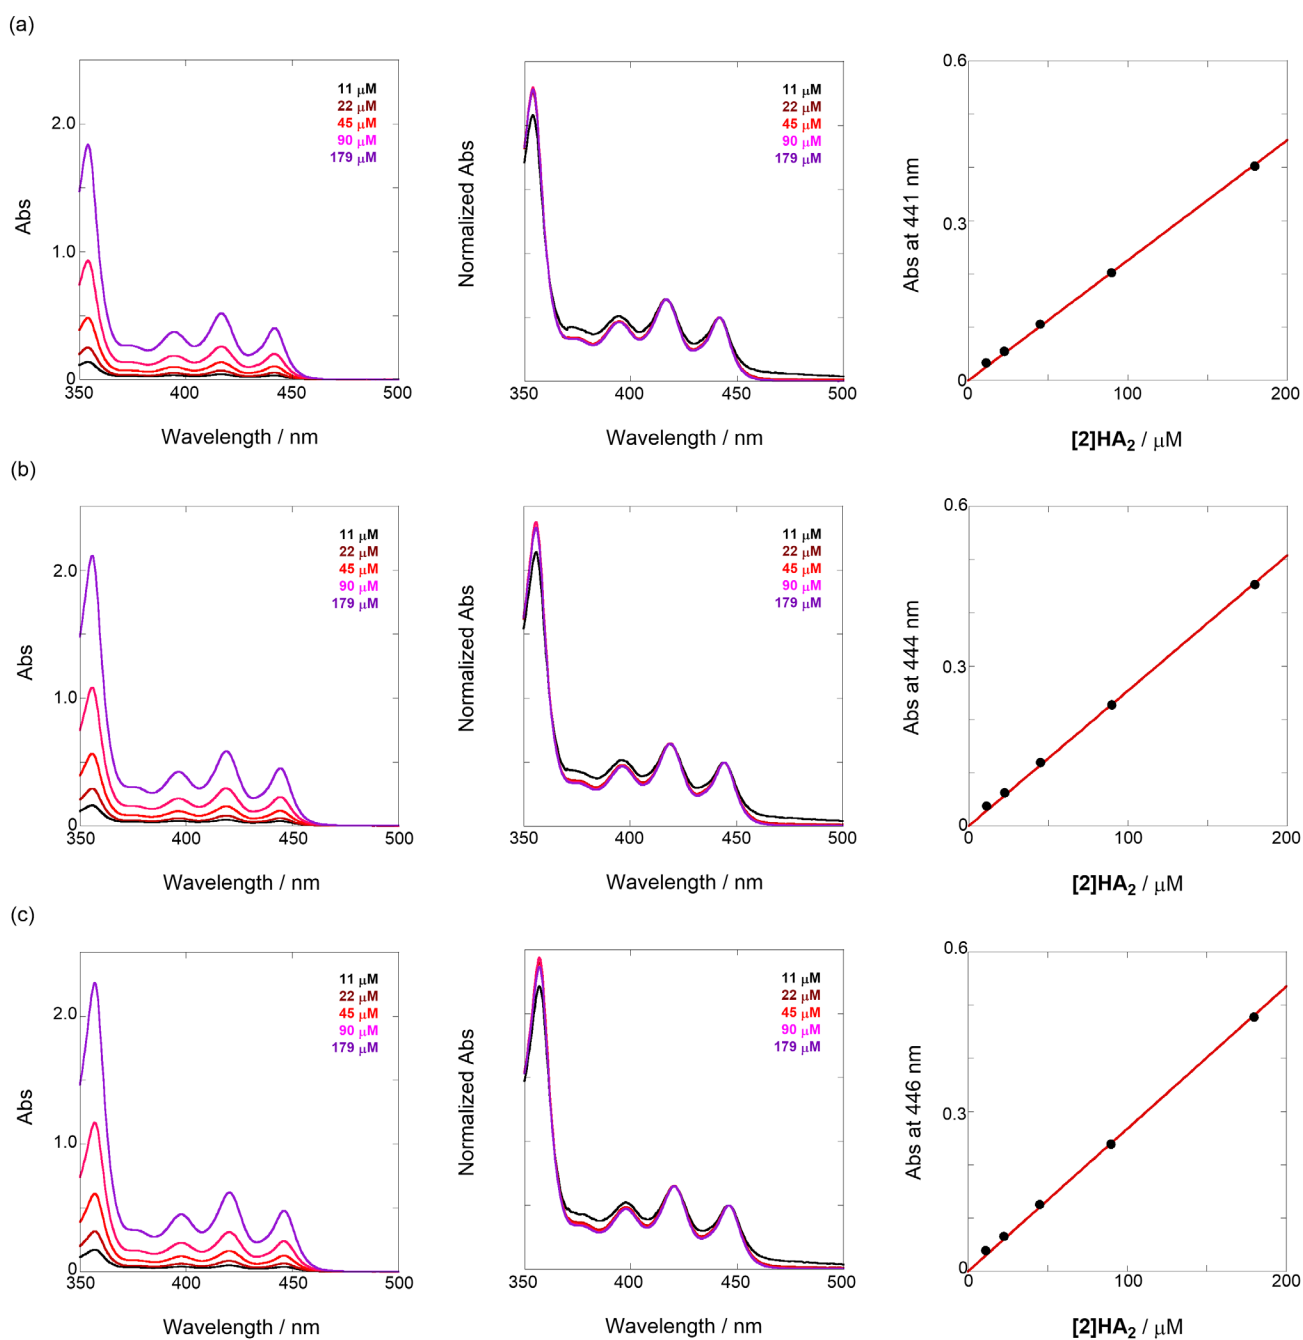

**Figure S3.** Concentration-dependent (11–179  $\mu\text{M}$ , from black to purple) UV/vis absorption spectra (left), normalized UV/vis absorption spectra (center), and absorbance–concentration plots (right) of [2]HA<sub>2</sub> at (a) 0.1 MPa (correlation coefficient  $r = 0.999$ ), (b) 160 MPa ( $r = 0.999$ ), and (c) 320 MPa ( $r = 0.999$ ) in toluene at room temperature in a high-pressure cell.

## UV/vis Absorption and Fluorescence Spectra of [2]HA<sub>2</sub>

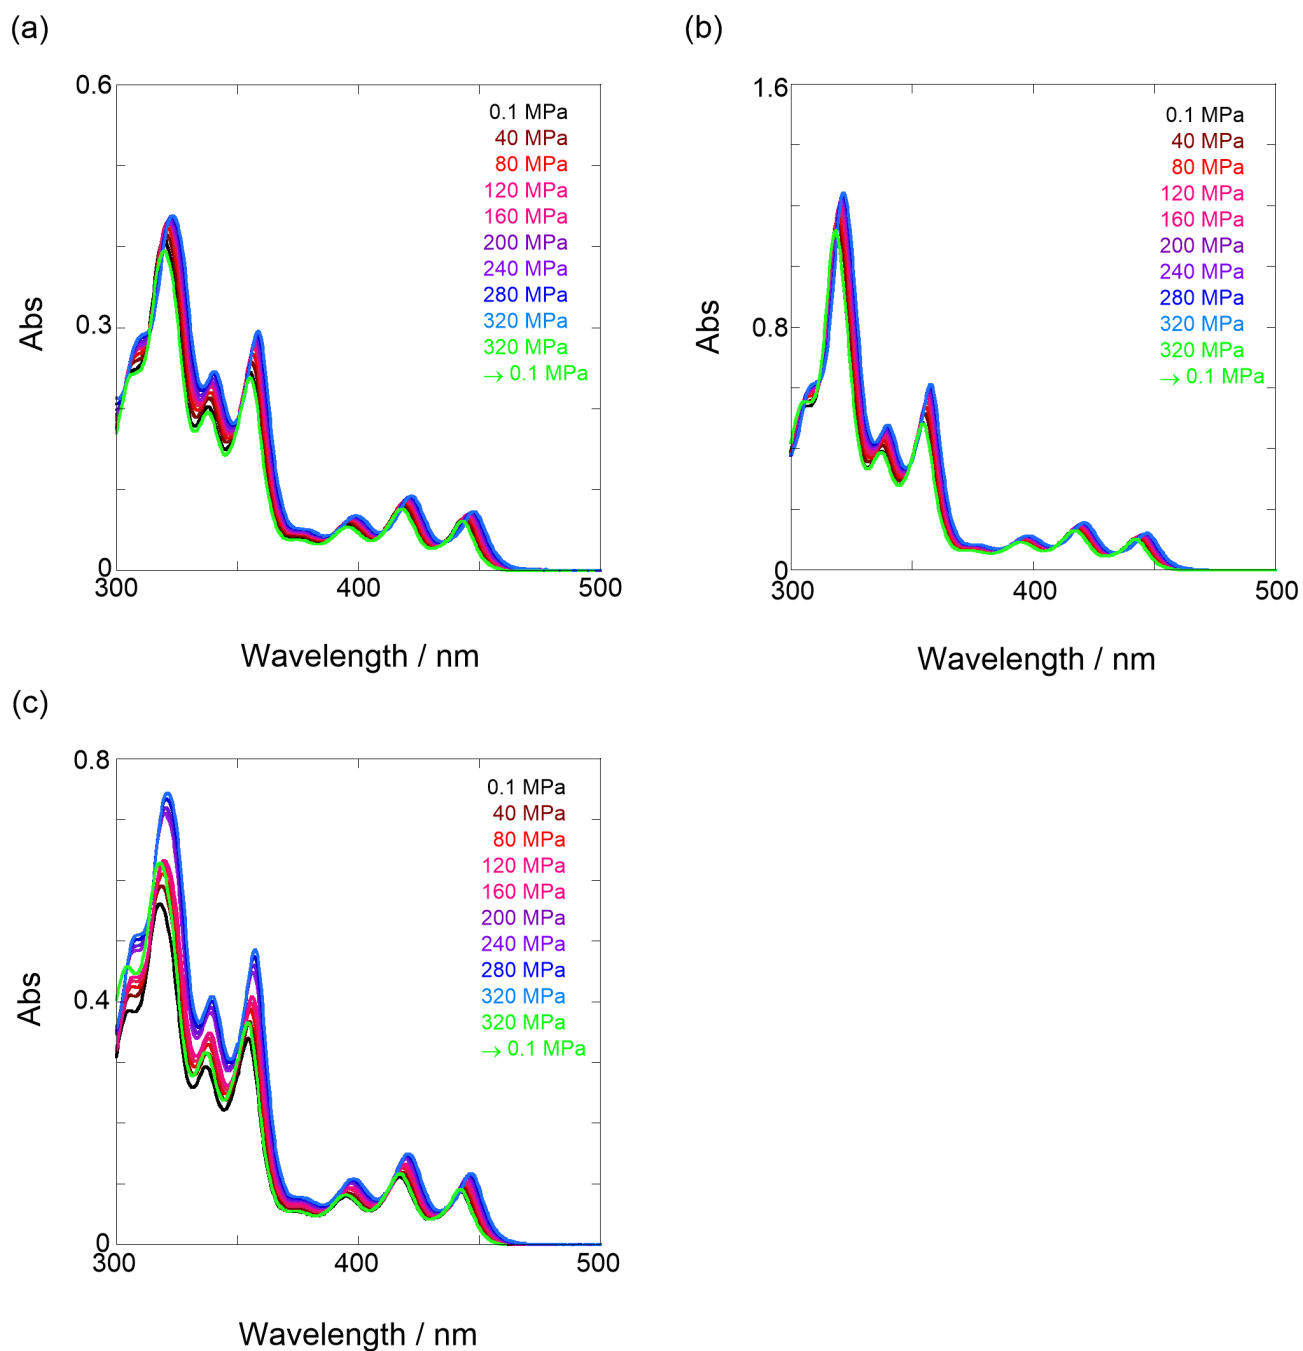

**Figure S4.** Pressure-dependent UV/vis absorption spectra of [2]HA<sub>2</sub> in (a) toluene (66 μM), (b) chloroform (58 μM), and (c) DCM (57 μM) at room temperature in a high-pressure cell. Pressure applied: 0.1, 40, 80, 120, 160, 200, 240, 280, and 320 MPa (from black to light blue). The green line shows the spectrum at 0.1 MPa after depressurization from 320 MPa.

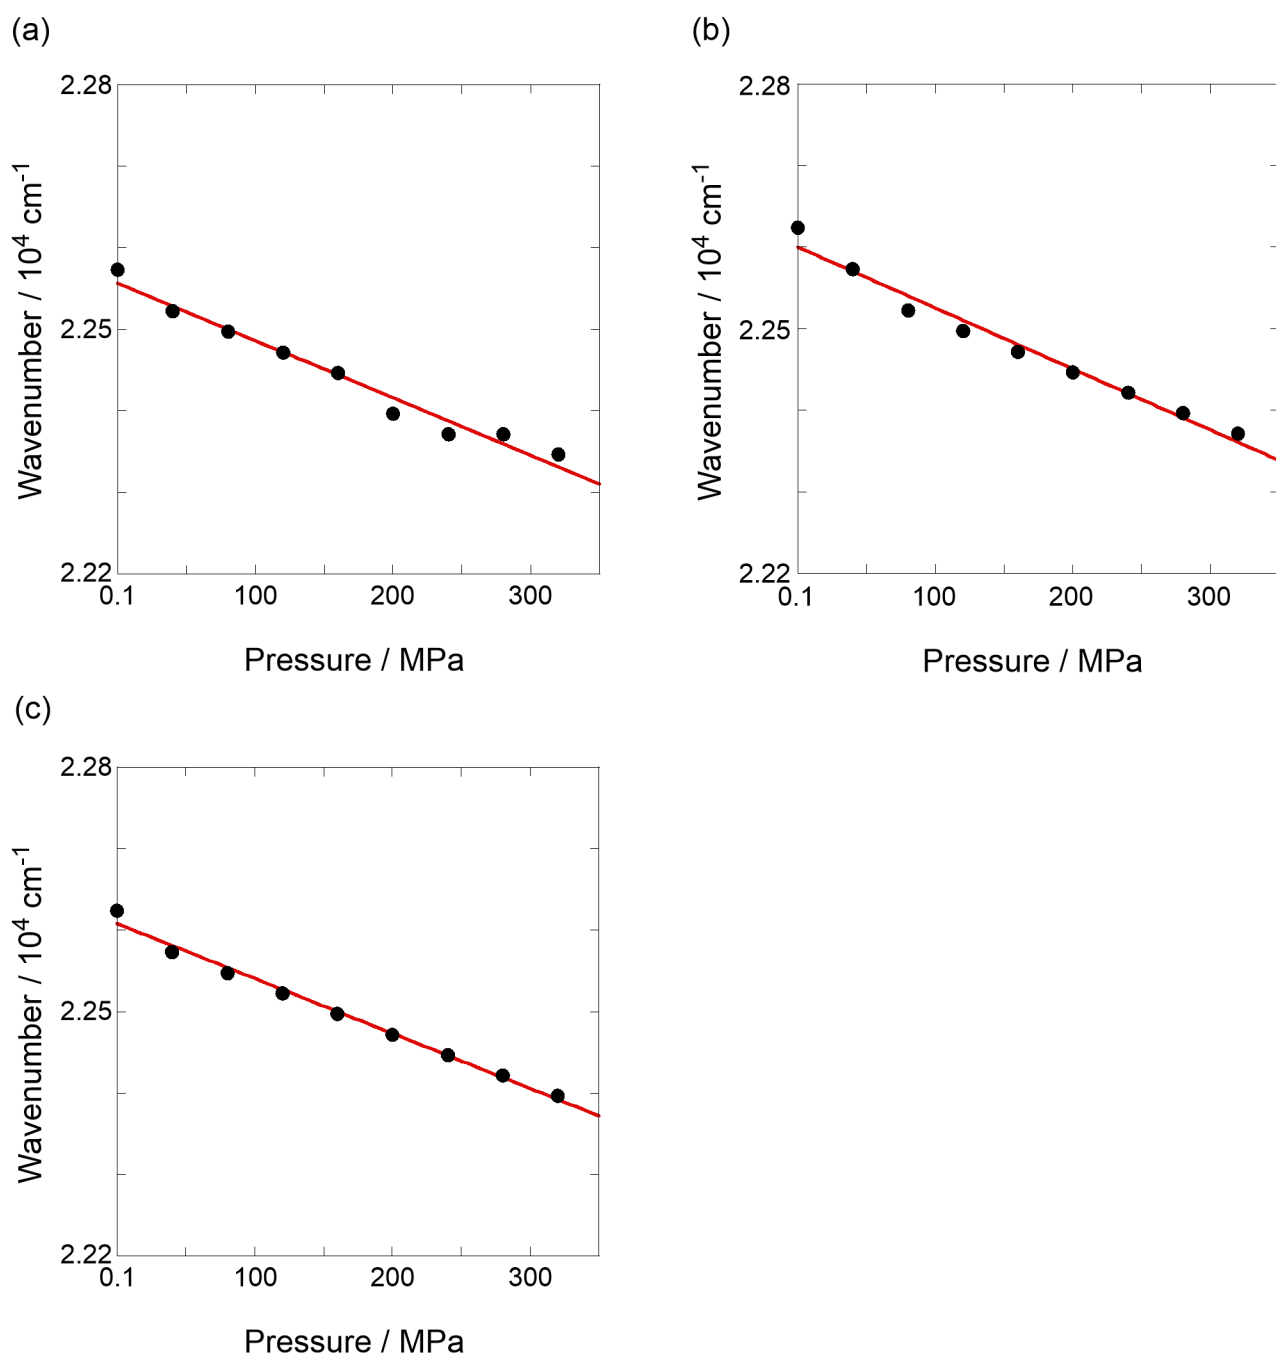

**Figure S5.** Plots of wavenumber changes for the pressure-induced absorption maxima of [2]HA<sub>2</sub> in (a) toluene ( $r = 0.986$ , slope;  $-0.70 \text{ cm}^{-1} \text{ MPa}^{-1}$ ), (b) chloroform ( $r = 0.988$ , slope;  $-0.75 \text{ cm}^{-1} \text{ MPa}^{-1}$ ), and (c) DCM ( $r = 0.995$ , slope;  $-0.68 \text{ cm}^{-1} \text{ MPa}^{-1}$ ).

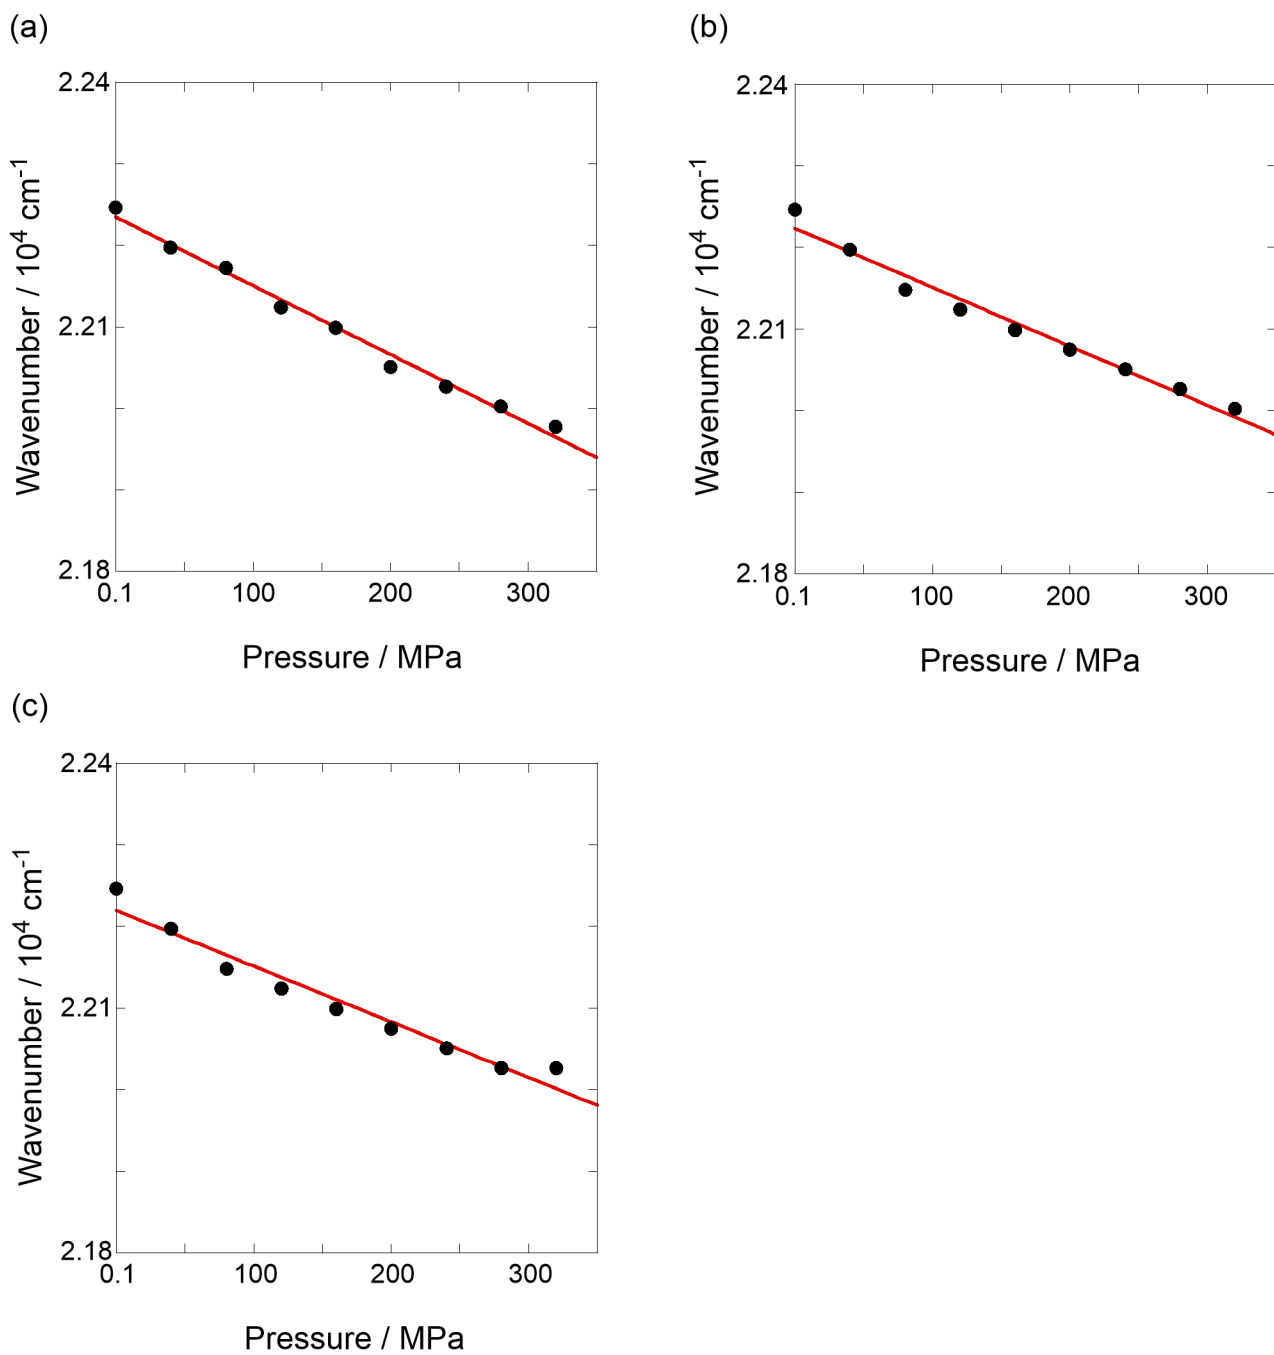

**Figure S6.** Plots of wavenumber changes for the pressure-induced fluorescence maxima of [2]HA<sub>2</sub> in (a) toluene ( $r = 0.995$ , slope;  $-0.85 \text{ cm}^{-1} \text{ MPa}^{-1}$ ), (b) chloroform ( $r = 0.988$ , slope;  $-0.72 \text{ cm}^{-1} \text{ MPa}^{-1}$ ), and (c) DCM ( $r = 0.977$ , slope;  $-0.68 \text{ cm}^{-1} \text{ MPa}^{-1}$ ).

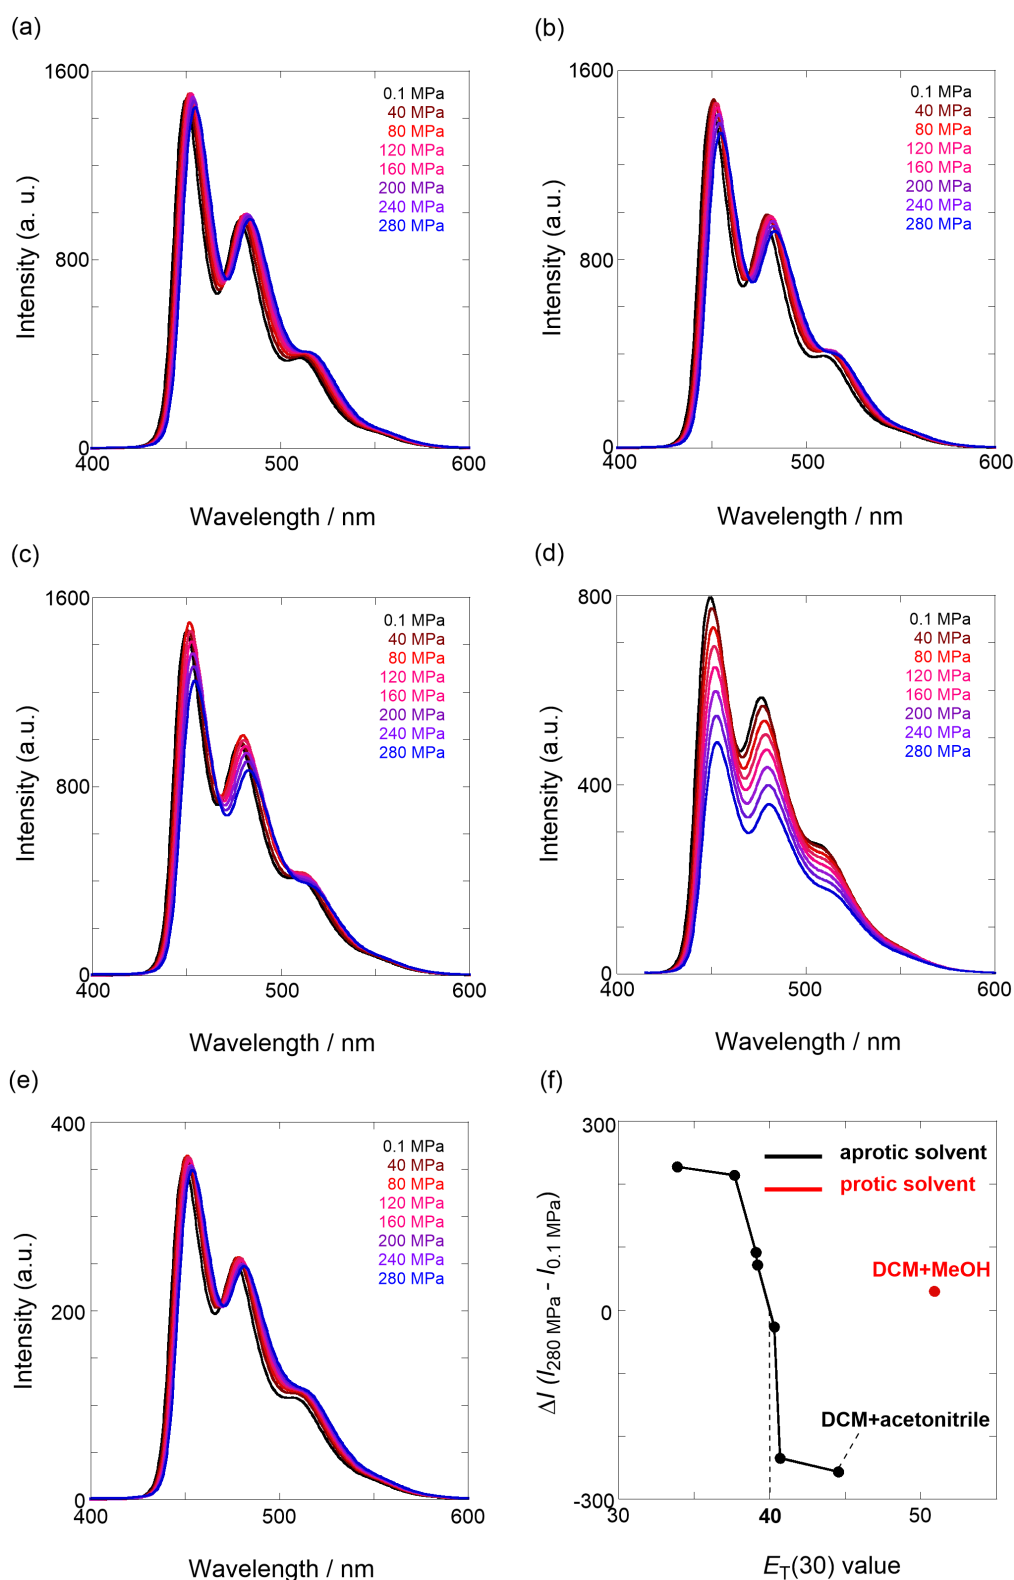

**Figure S7.** Pressure-dependent fluorescence spectra ( $\lambda_{\text{ex}}$  390–409 nm) of [2]HA<sub>2</sub> in (a) 75:25 (v/v) toluene-DCM (59  $\mu\text{M}$ ), (b) 50:50 (v/v) toluene-DCM (59  $\mu\text{M}$ ), (c) 25:75 (v/v) toluene-DCM (59  $\mu\text{M}$ ), (d) 50:50 (v/v) DCM-acetonitrile (61  $\mu\text{M}$ ), and (e) 75:25 (v/v) DCM-MeOH (57  $\mu\text{M}$ ) at room temperature in a high-pressure cell. Pressure applied: 0.1, 40, 80, 120, 160, 200, 240, and 280 MPa (from black to blue). (d) Hydrostatic pressure-induced  $\Delta I (I_{280 \text{ MPa}} - I_{0.1 \text{ MPa}})$  against  $E_T(30)$ .



**Discussion:** About a similar foldamer chemosensor (see ref. 26 in the main text), the effect of methanol as a protic solvent was closely investigated, revealing the appropriate interactions between methanol and the chemosensor. Indeed, in the literature, the addition of methanol causes the decreases of binding constants of targeted ion pairs, but  $\Delta V^\circ$  did not alter significantly. This and the present data indicate that methanol may affect to not the ground-state ion-pairing volume but the excited-state fluorescence quenching critically.

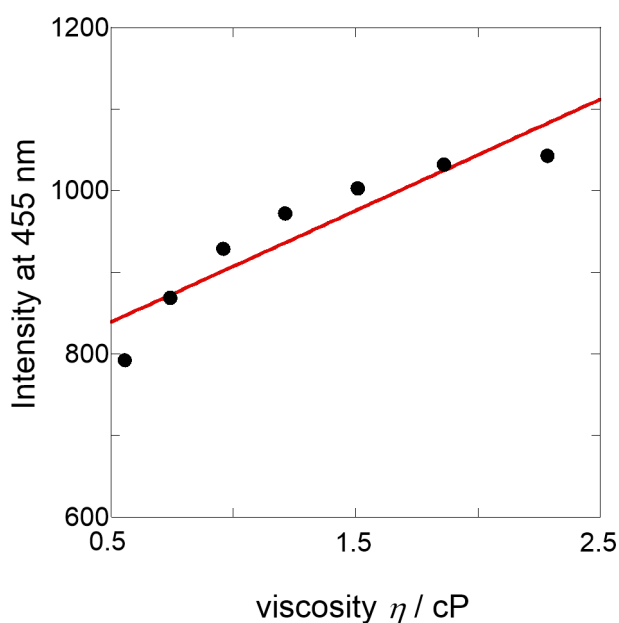

**Figure S8.** Pressure dependence of fluorescence intensity ( $\lambda_{\text{obs}}$  455 nm) of **[2]HA<sub>2</sub>** in toluene as a function of toluene viscosity ( $r = 0.925$ ).

**Discussion:** In order to investigate the extent of a viscosity effect in **[2]HA<sub>2</sub>**, we plotted the fluorescence intensity (455 nm) in toluene against toluene viscosity, and then investigated the correlation. As shown in Fig. S8, a slight correlation ( $r = 0.925$ ) was observed, but deviated in the initial and late stage of the applied pressures. It can be therefore concluded that the correlation for considering effects on hydrostatic pressure seems to be better using data shown in Fig. 3, rather than the viscosity.

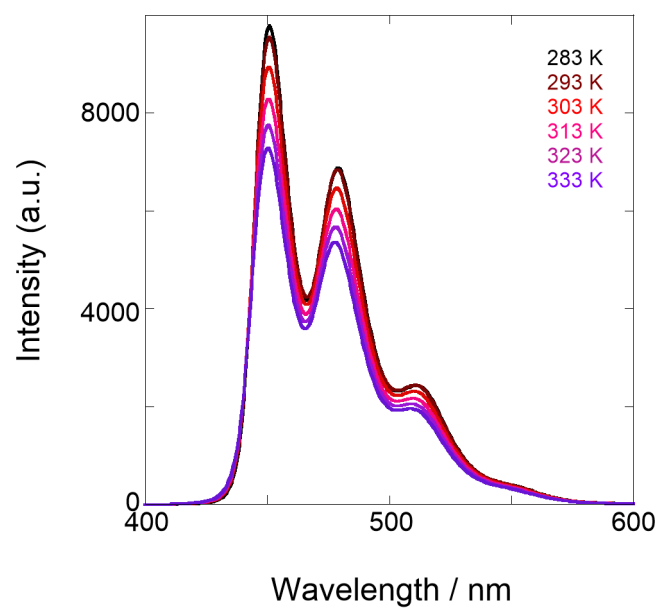

**Figure S9.** Temperature-dependent fluorescence spectra ( $\lambda_{\text{ex}}$  391 nm) of **[2]HA<sub>2</sub>** in toluene at 0.1 MPa in a regular 1 cm cell.

## Excitation Spectra of [2]HA<sub>2</sub>

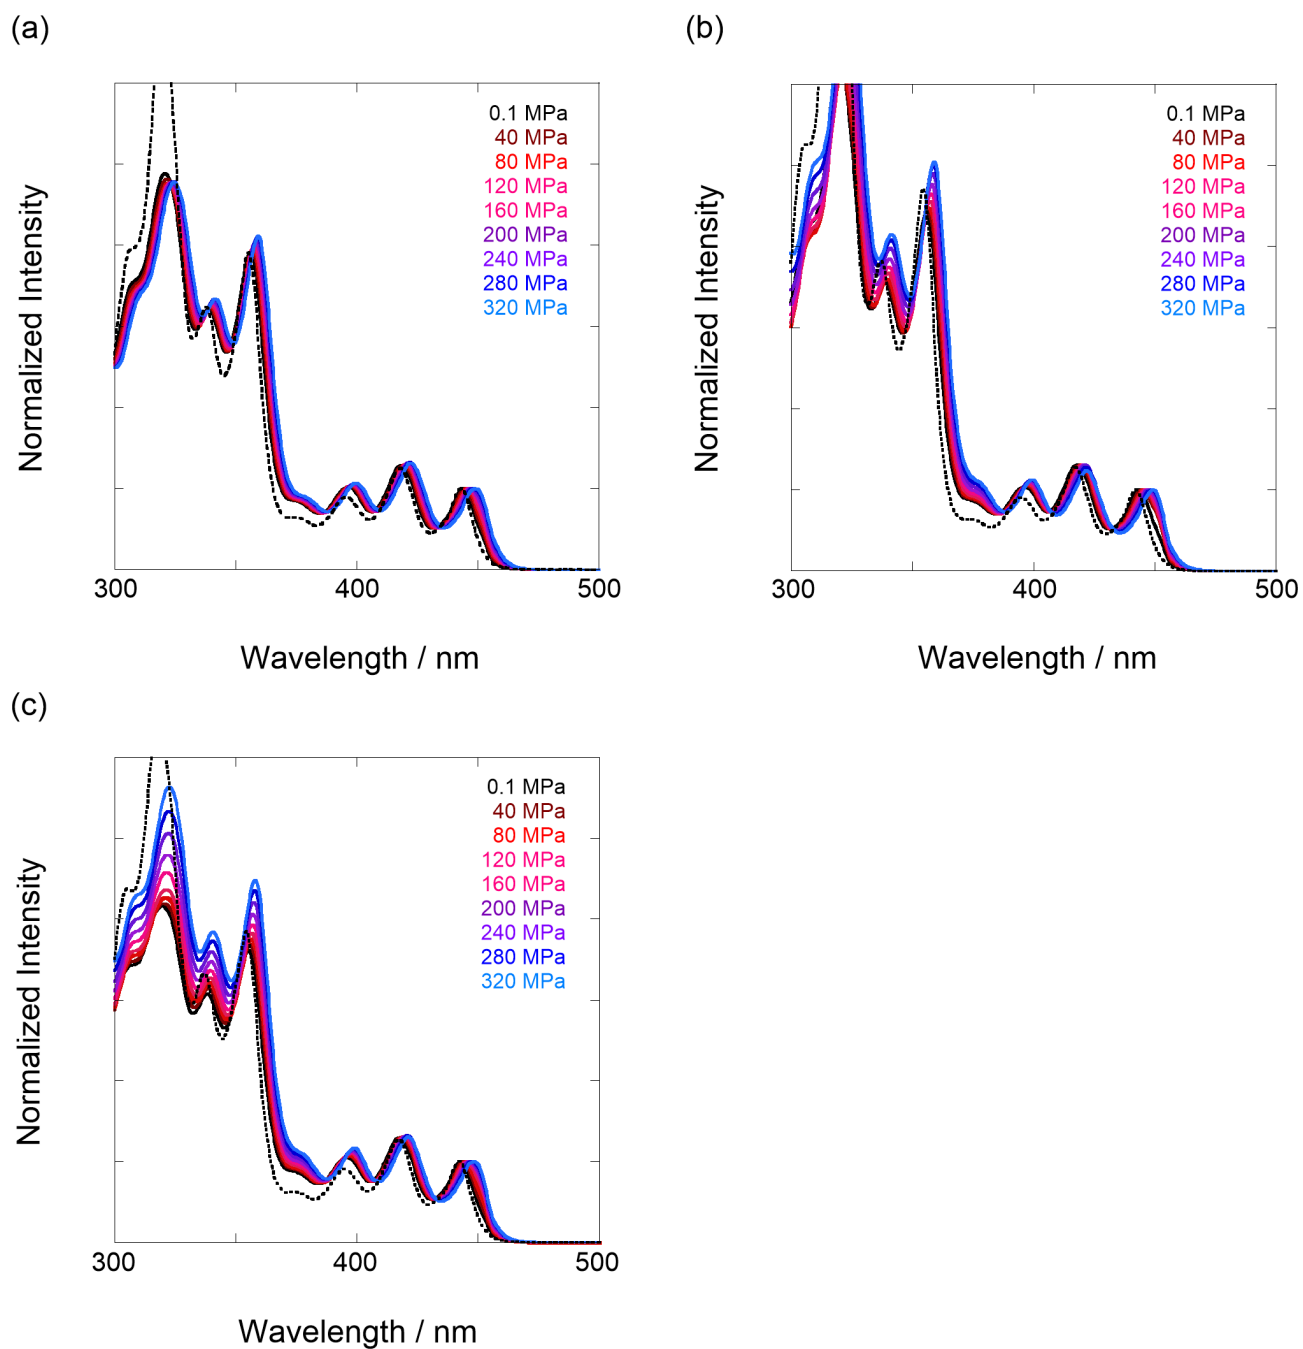

**Figure S10.** Pressure-dependent excitation spectra ( $\lambda_{em}$  450 nm) of [2]HA<sub>2</sub> in (a) toluene (66  $\mu$ M), (b) chloroform (61  $\mu$ M), and (c) DCM (57  $\mu$ M) at room temperature in a high-pressure cell. Black dotted lines show the normalized UV/vis absorption spectra at 0.1 MPa. Pressure applied: 0.1, 40, 80, 120, 160, 200, 240, 280, and 320 MPa (from black to light blue).

## Fluorescence Lifetime Decays of [2]HA<sub>2</sub>

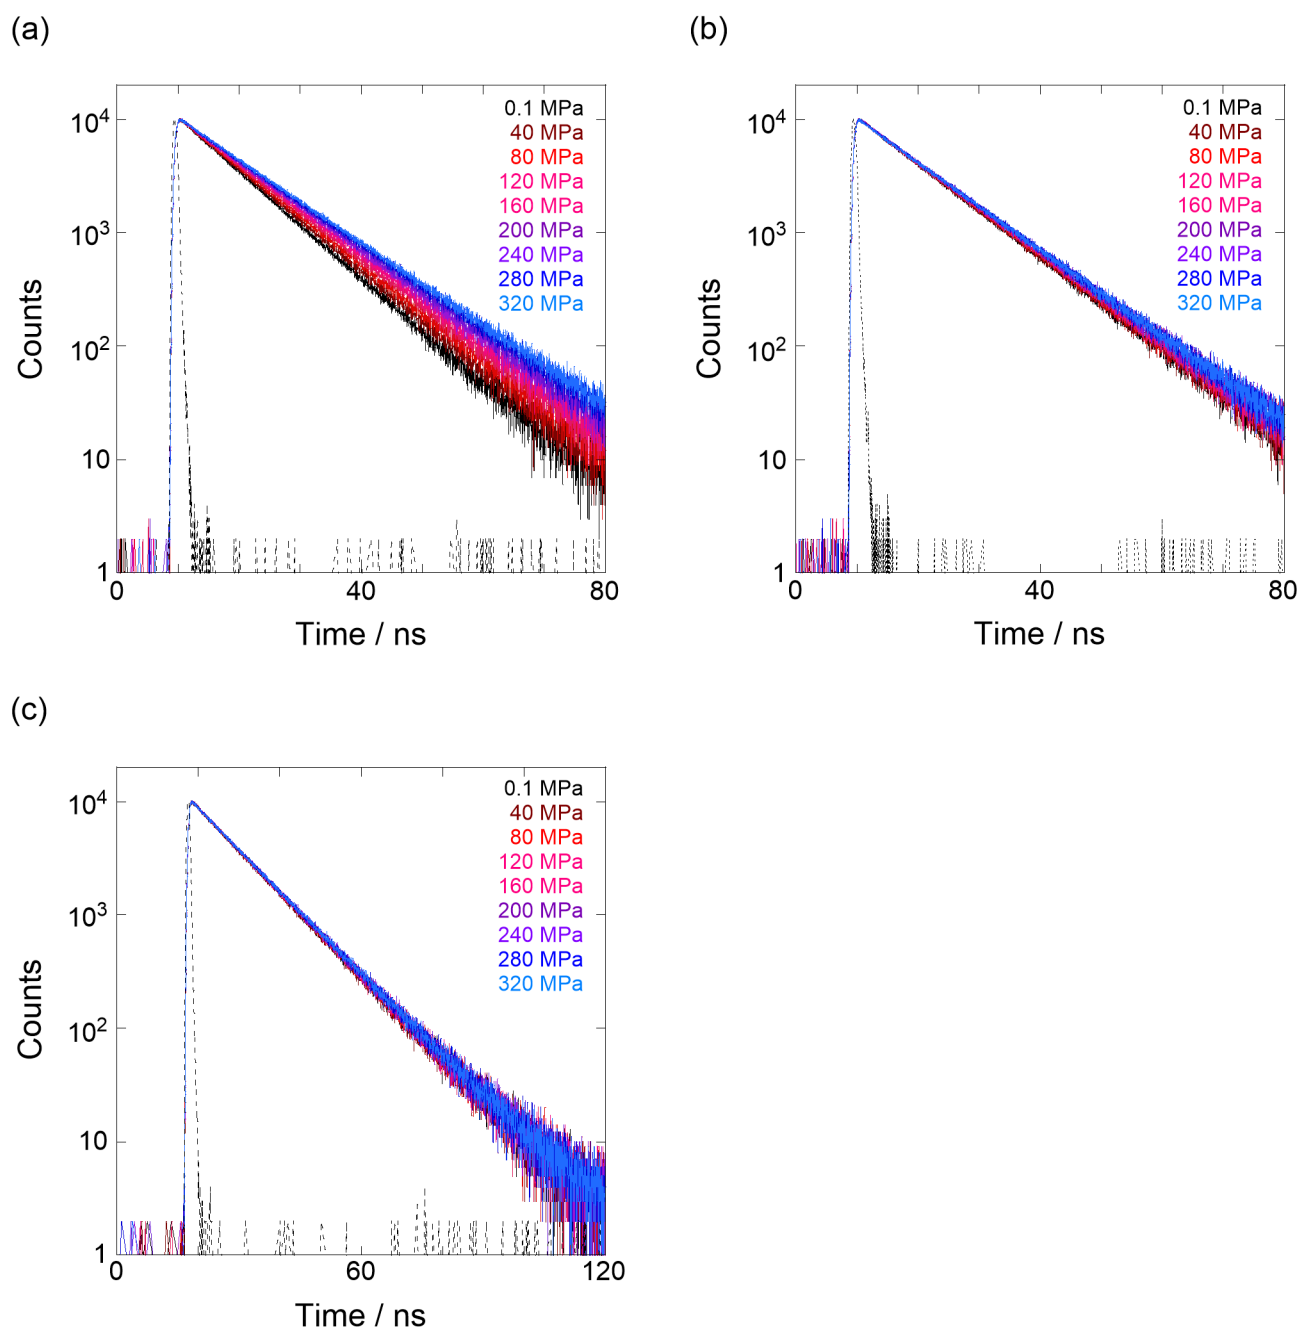

**Figure S11.** Time-correlated fluorescence decay ( $\lambda_{\text{ex}}$  405 nm,  $\lambda_{\text{em}}$  450 nm) of [2]HA<sub>2</sub> at 0.1, 40, 80, 120, 160, 200, 240, 280, and 320 MPa (from black to sky blue lines) in (a) toluene (66 μM), (b) chloroform (61 μM), and (c) DCM (57 μM) at room temperature in a high-pressure cell. The black dotted line represents the instrument response function.

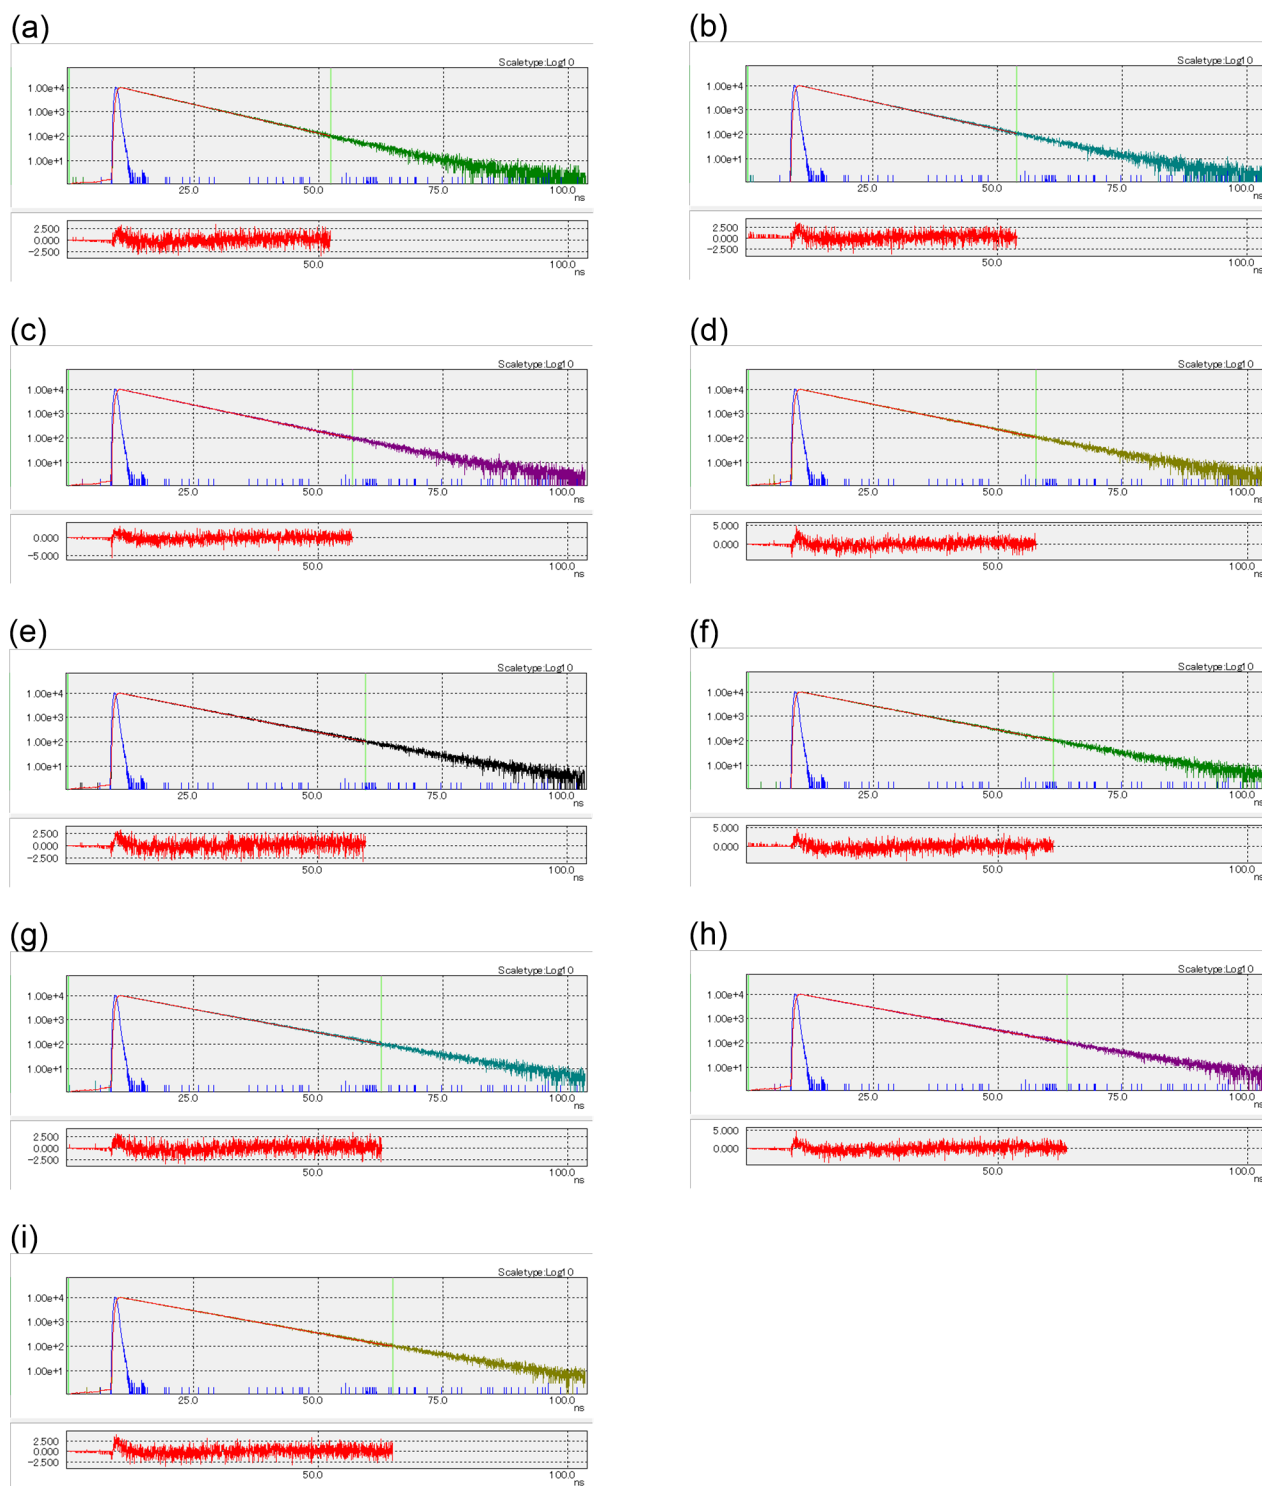

**Figure S12.** Time-correlated fluorescence decay of [2]HA<sub>2</sub> (66 μM) monitored at 450 nm at (a) 0.1, (b) 40, (c) 80, (d) 120, (e) 160, (f) 200, (g) 240, (h) 280, and (i) 320 MPa in toluene at room temperature in a high-pressure cell. The colored, red, and blue lines represent fluorescence decay, fitting result, and the instrument response function, respectively.

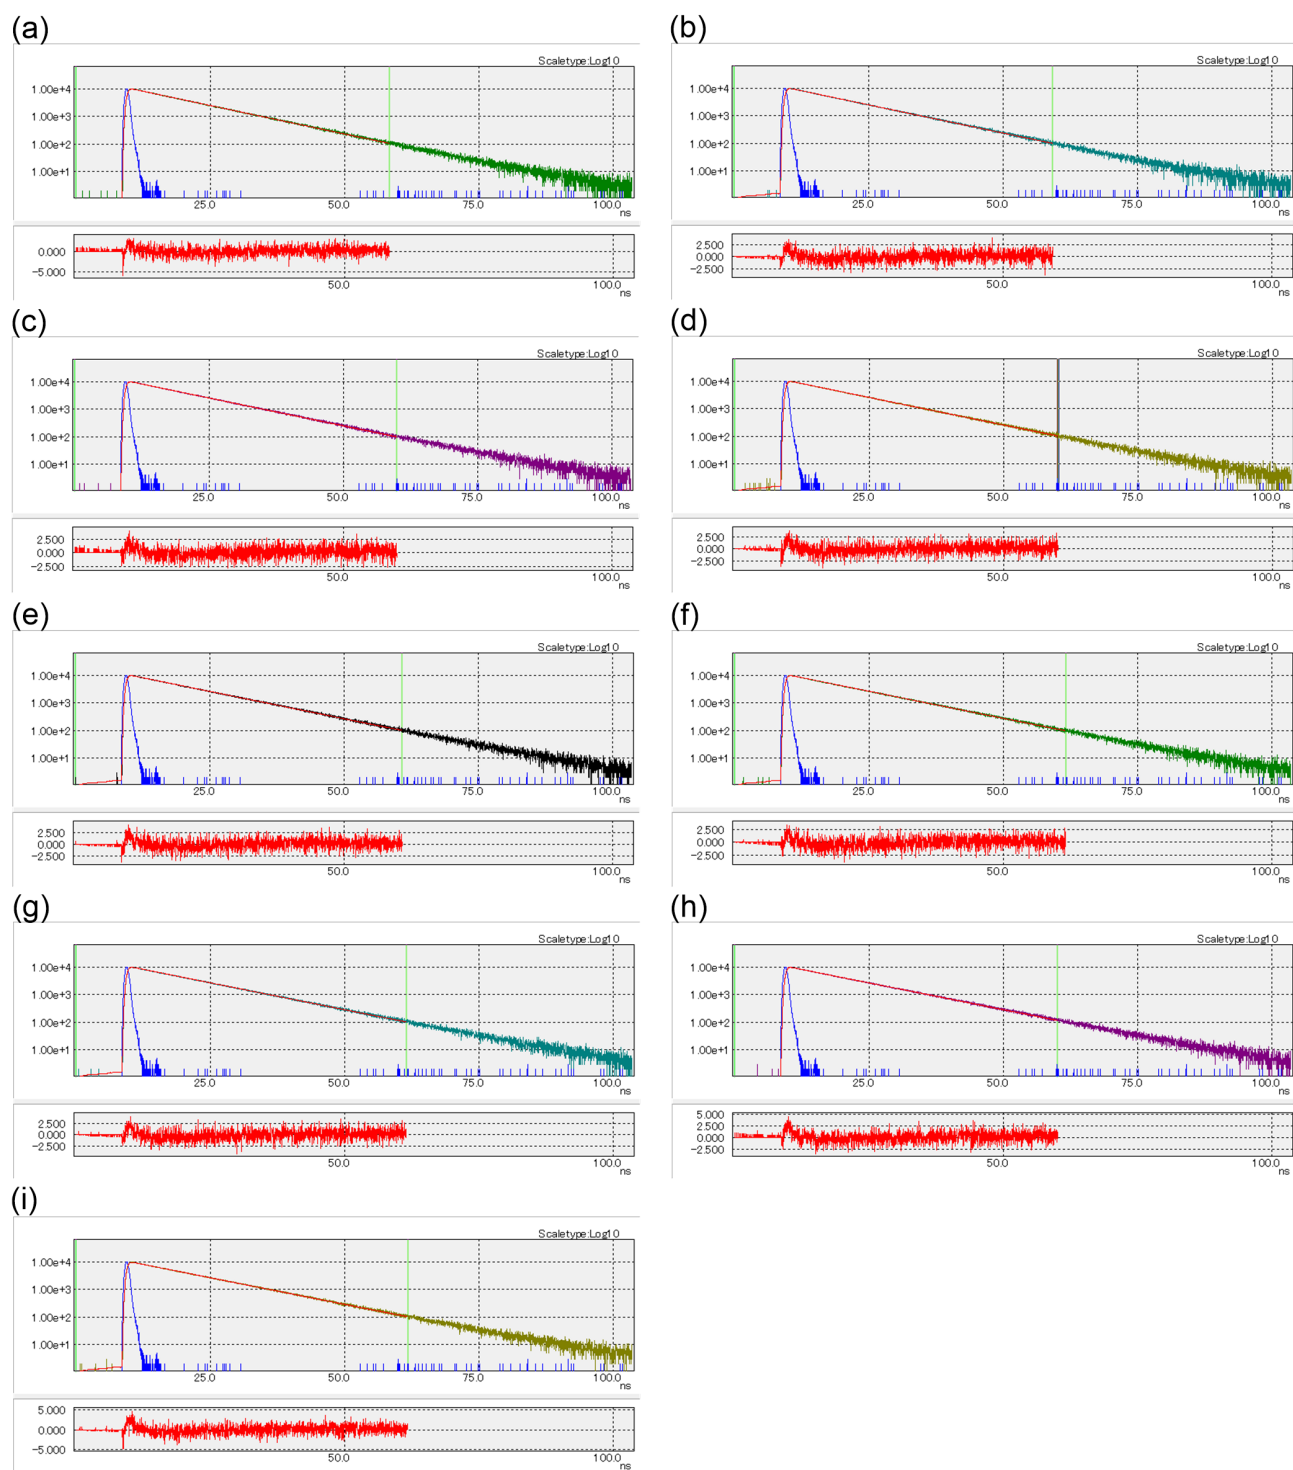

**Figure S13.** Time-correlated fluorescence decay of [2]HA<sub>2</sub> (61 μM) monitored at 450 nm at (a) 0.1, (b) 40, (c) 80, (d) 120, (e) 160, (f) 200, (g) 240, (h) 280, and (i) 320 MPa in chloroform at room temperature in a high-pressure cell. The colored, red, and blue lines represent fluorescence decay, fitting result, and the instrument response function, respectively.

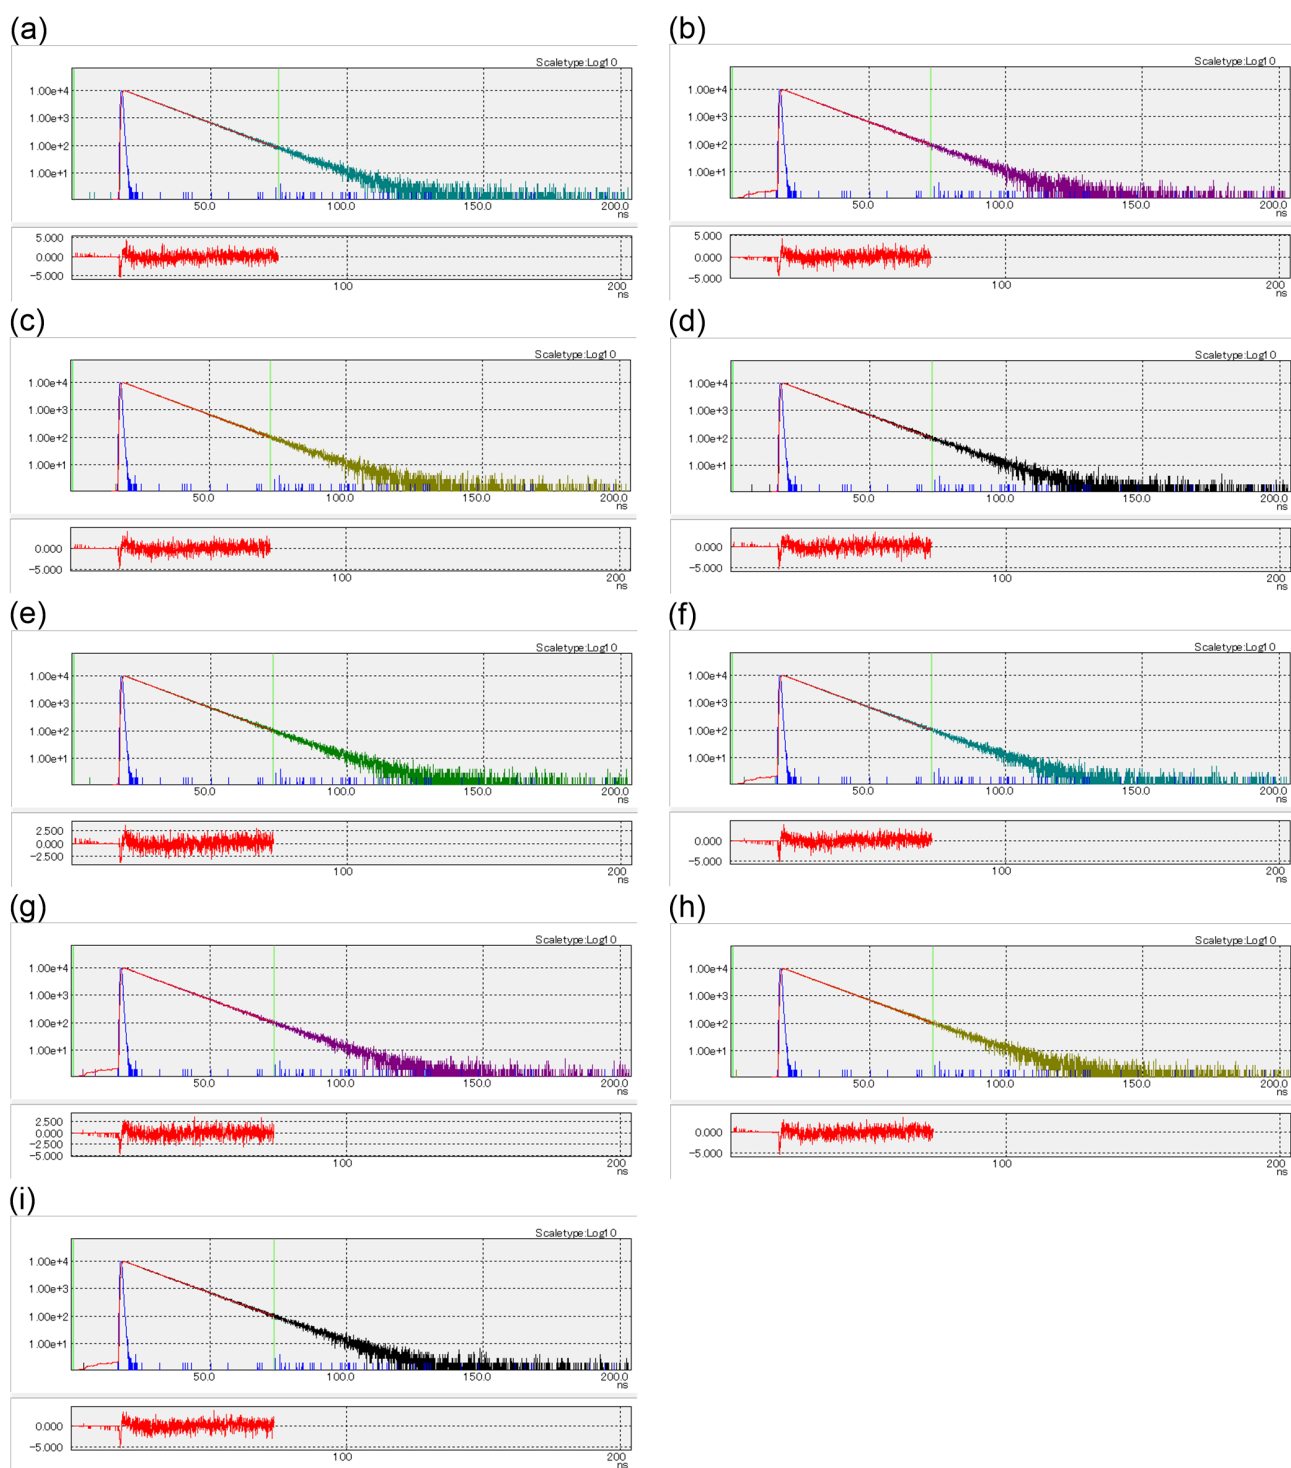

**Figure S14.** Time-correlated fluorescence decay of  $[2]\text{HA}_2$  ( $57 \mu\text{M}$ ) monitored at 450 nm at (a) 0.1, (b) 40, (c) 80, (d) 120, (e) 160, (f) 200, (g) 240, (h) 280, and (i) 320 MPa in DCM at room temperature in a high-pressure cell. The colored, red, and blue lines represent fluorescence decay, fitting result, and the instrument response function, respectively.

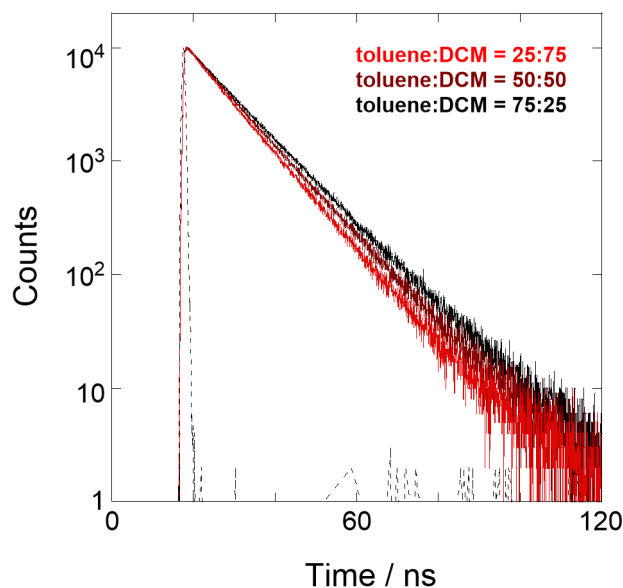

**Figure S15.** Time-correlated fluorescence decay ( $\lambda_{\text{ex}}$  405 nm,  $\lambda_{\text{em}}$  450 nm) of **[2]HA<sub>2</sub>** in each solvent (black: 75:25 (v/v) toluene-DCM, brown: 50:50 (v/v) toluene-DCM, red: 25:75 (v/v) toluene-DCM) at 0.1 MPa at room temperature in a high-pressure cell. The black dotted line represents the instrument response function.

**Table S1. Fluorescence Lifetimes of [2]HA<sub>2</sub> in Toluene-DCM Mixtures at 0.1 MPa<sup>a</sup>**

| Solvent                 | $\lambda_{\text{em}}^b/\text{nm}$ | $\tau/\text{ns}$ | $\chi^2$ |
|-------------------------|-----------------------------------|------------------|----------|
| Toluene                 | 450                               | 9.1              | 1.1      |
| 75:25 (v/v) toluene-DCM | 450                               | 10.1             | 1.3      |
| 50:50 (v/v) toluene-DCM | 450                               | 10.9             | 1.3      |
| 25:75 (v/v) toluene-DCM | 450                               | 11.6             | 1.3      |
| DCM                     | 450                               | 11.6             | 1.3      |

<sup>a</sup>Fluorescence lifetime determined using hydrostatic pressure time-correlated single-photon counting method at room temperature;  $\lambda_{\text{ex}} = 405$  nm. <sup>b</sup>Monitoring wavelength.



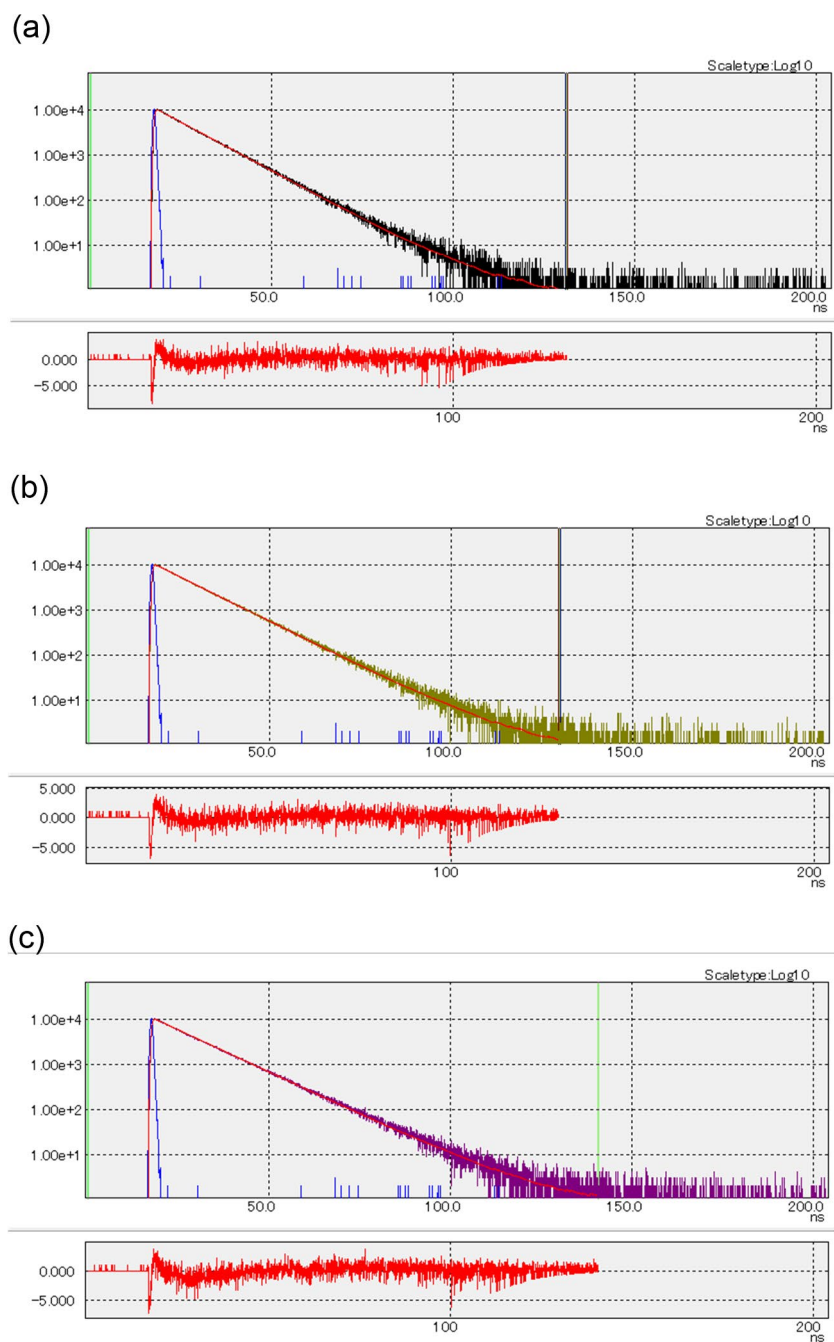

**Figure S16.** Time-correlated fluorescence decay of [2]HA<sub>2</sub> (57 μM) monitored at 450 nm in (a) 75:25 (v/v) toluene-DCM, (b) 50:50 (v/v) toluene-DCM, and (c) 25:75 (v/v) toluene-DCM at 0.1 MPa at room temperature in a high-pressure cell. The colored, red, and blue lines represent fluorescence decay, fitting result, and the instrument response function, respectively.

## Determination of Fluorescence Quantum Yields ( $\Phi_{F,X \text{ MPa}}$ ) under Hydrostatic Pressure

As described in the Experimental Section, the  $\Phi_{F,0.1 \text{ MPa}}$  values were evaluated using a spectrofluorometer (FP-8500) fitted with an integrating sphere, after which the relative fluorescence quantum yields under hydrostatic pressure ( $\Phi_{F,X \text{ MPa}}$ ) were determined using Eq. S1:<sup>4</sup>

$$\Phi_{F,X \text{ MPa}} = \Phi_{F,0.1 \text{ MPa}} \cdot \frac{A_{P_0}}{A_P} \cdot \frac{I_{P_0}}{I_P} \cdot \frac{n_P^2}{n_{P_0}^2} \cdot \frac{D_P}{D_{P_0}} \quad (\text{S1})$$

where  $A$ ,  $I$ ,  $n$ , and  $D$  are the absorbance at the excitation wavelength, intensity of the excitation light, refractive index, and area ratio in the fluorescence spectrum, respectively (Table S3–S5). The data for  $A$  were extracted from Figure S4. The value of  $I_P/I_{P_0}$  was set at unity because the measurements were performed at the same excitation wavelength under each pressure (Figure 2). The refractive indices at 0.1 MPa at 298.15 K ( $n_{P_0}$ ) were identical to the literature values,<sup>5,6</sup> and the refractive indices under pressure ( $n_P$ ) were calculated from the change in the densities of each solvent using the Eykman equation (Eq. S2). The densities of each solvent were calculated by fitting previous data obtained by applying Eq. S3 (see Figure S17 and Table S2). The constant  $C$  was calculated using known density data at 0.1 MPa.<sup>7–9</sup> The data for  $D$  were obtained by integrating the area of the fluorescence spectra using MATLAB software.<sup>10</sup>

$$\frac{n^2 - 1}{n + 0.4} \cdot \frac{1}{d} = C \quad (\text{S2})$$

$$d(P) = \sum_{i=1}^5 a_i P^{i-1} \quad (\text{S3})$$

---

<sup>4</sup> J. N. Demas and G. A. Crosby, *J. Phys. Chem.* 1971, **75**, 991–1024.

<sup>5</sup> B. González, I. Domínguez, E. J. González and A. Domínguez, *J. Chem. Eng. Data* 2010, **55**, 1003–1011.

<sup>6</sup> T. M. Aminabhavi and K. Banerjee, *J. Chem. Eng. Data* 1998, **43**, 1096–1101.

<sup>7</sup> K. R. Harris, *J. Chem. Eng. Data* 2000, **45**, 893–897.

<sup>8</sup> R. A. Clará, A. C. G. Marigliano, D. Morales and H. N. Sólamo *J. Chem. Eng. Data* 2010, **55**, 5862–5887.

<sup>9</sup> L. G. Schornack and C. A. Eckert, *J. Phys. Chem.* 1970, **74**, 3014–3020.

<sup>10</sup> C. C. Chen and K. Vedam, *J. Chem. Phys.* 1980, **73**, 4577–4854.

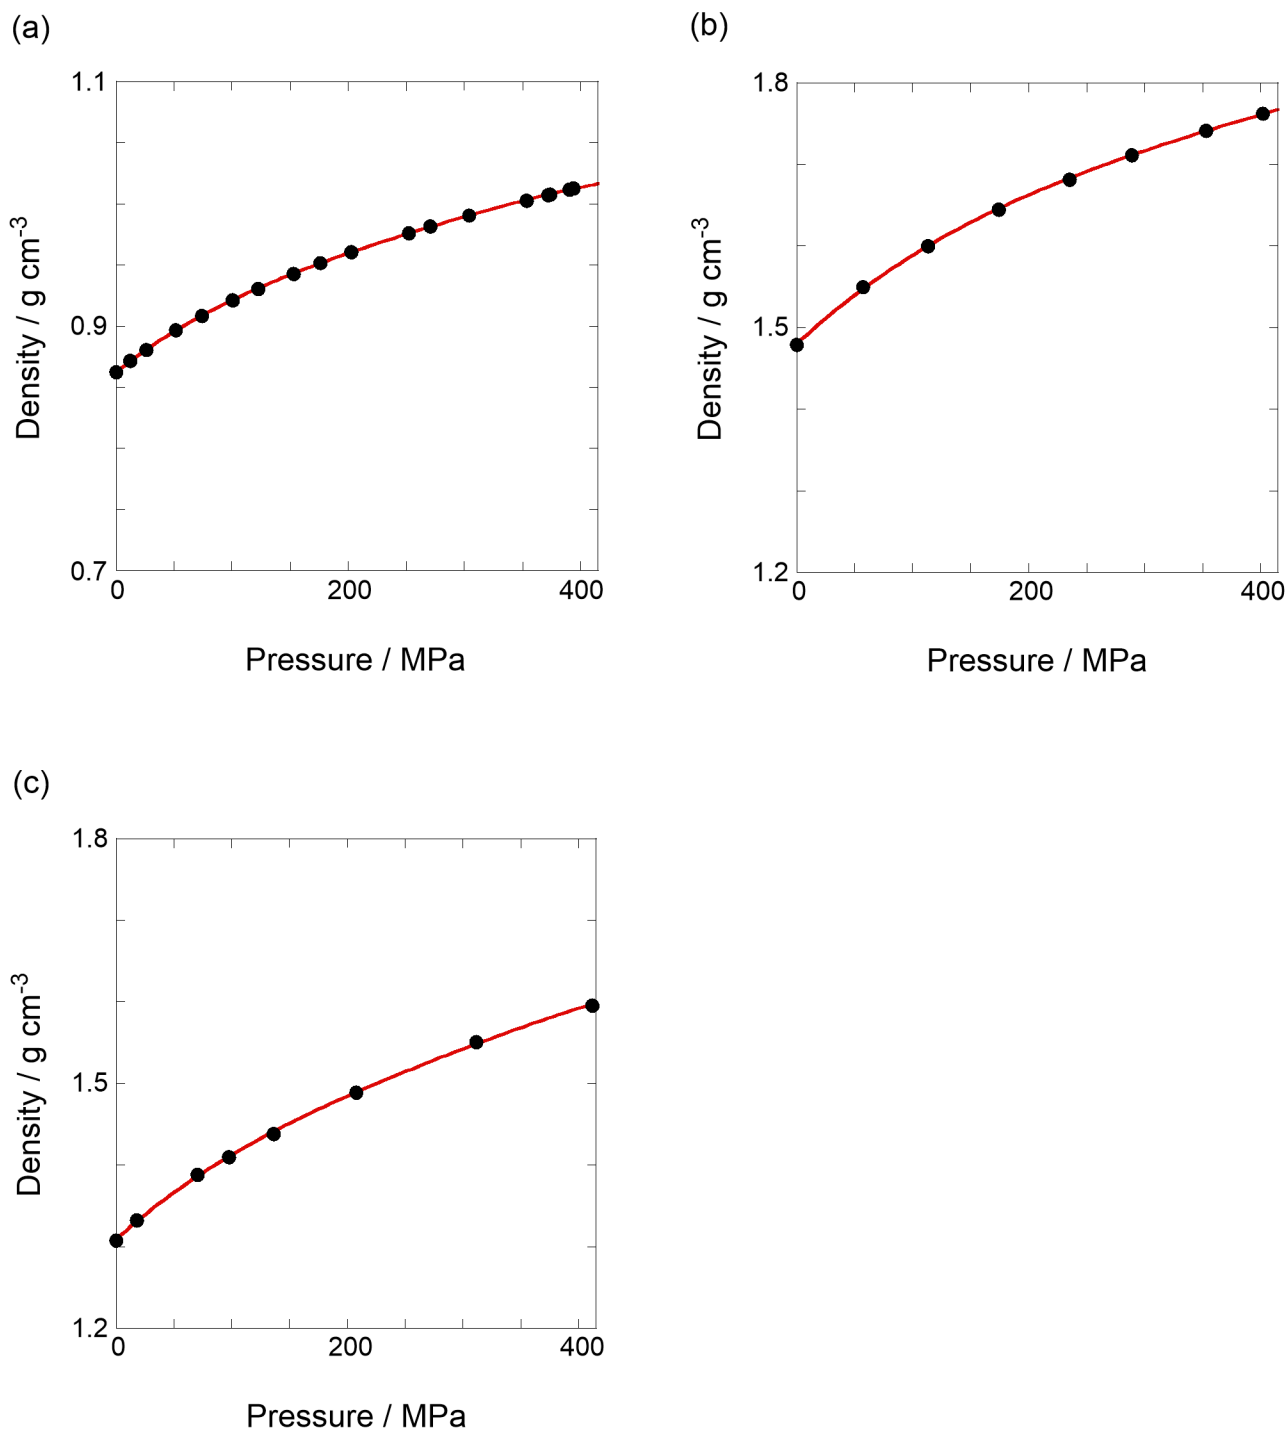

**Figure S17.** Pressure-dependent solvent densities in (a) toluene (298.15 K, extracted from Ref. 7), (b) chloroform (298.15 K, extracted from Ref. 10), and (c) DCM (303.15 K, extracted from Ref. 9).

**Table S2. Fitting Parameters of Pressure-Dependent Solvent Density Plots**

| Solvent    | a <sub>1</sub> | a <sub>2</sub>         | a <sub>3</sub>          | a <sub>4</sub>         | a <sub>5</sub>           |
|------------|----------------|------------------------|-------------------------|------------------------|--------------------------|
| Toluene    | 0.863          | $0.750 \times 10^{-3}$ | $-2.001 \times 10^{-6}$ | $4.141 \times 10^{-6}$ | $-3.653 \times 10^{-12}$ |
| Chloroform | 1.480          | $1.325 \times 10^{-3}$ | $-2.708 \times 10^{-6}$ | $3.702 \times 10^{-6}$ | $-2.041 \times 10^{-12}$ |
| DCM        | 1.309          | $1.284 \times 10^{-3}$ | $-3.015 \times 10^{-6}$ | $5.904 \times 10^{-6}$ | $-4.909 \times 10^{-12}$ |

**Table S3. Relative Fluorescence Quantum Yields of [2]HA<sub>2</sub> in Toluene**

| Pressure / MPa | Density <sup>a</sup> / g cm <sup>-3</sup> | Refractive index ( $n_{P_0}$ ) <sup>c</sup> | Area ( $D_{P_0}$ ) <sup>e</sup> | Abs ( $A_{P_0}$ ) <sup>f</sup> | Fluorescence quantum yield ( $\Phi_{P_0}$ ) <sup>g</sup> |
|----------------|-------------------------------------------|---------------------------------------------|---------------------------------|--------------------------------|----------------------------------------------------------|
| 0.1            | 0.862                                     | 1.494                                       | $1.751 \times 10^6$             | 0.048                          | 0.334                                                    |
| Pressure / MPa | Density <sup>b</sup> / g cm <sup>-3</sup> | Refractive index ( $n_P$ ) <sup>d</sup>     | Area ( $D_P$ ) <sup>e</sup>     | Abs ( $A_P$ ) <sup>f</sup>     | Fluorescence quantum yield ( $\Phi_P$ ) <sup>h</sup>     |
| 40             | 0.890                                     | 1.511                                       | $1.824 \times 10^6$             | 0.049                          | 0.351                                                    |
| 80             | 0.912                                     | 1.524                                       | $1.885 \times 10^6$             | 0.049                          | 0.366                                                    |
| 120            | 0.930                                     | 1.536                                       | $1.933 \times 10^6$             | 0.049                          | 0.383                                                    |
| 160            | 0.946                                     | 1.545                                       | $1.976 \times 10^6$             | 0.048                          | 0.400                                                    |
| 200            | 0.960                                     | 1.554                                       | $2.023 \times 10^6$             | 0.048                          | 0.415                                                    |
| 240            | 0.972                                     | 1.562                                       | $2.054 \times 10^6$             | 0.048                          | 0.425                                                    |
| 280            | 0.984                                     | 1.569                                       | $2.079 \times 10^6$             | 0.048                          | 0.435                                                    |
| 320            | 0.995                                     | 1.576                                       | $2.090 \times 10^6$             | 0.048                          | 0.441                                                    |

<sup>a</sup>Ref. 7. <sup>b</sup>Data calculated from the fitting results (Figure S17a and Table S2). <sup>c</sup>Ref. 5. <sup>d</sup>Data calculated using Eq. S2. <sup>e</sup>Data extracted from Figure 2a. <sup>f</sup>Data extracted from Figure S4a. <sup>g</sup>Measured using spectrofluorometer (FP-8500). <sup>h</sup>Data calculated using Eq. S1.

**Table S4. Relative Fluorescence Quantum Yields of [2]HA<sub>2</sub> in Chloroform**

| Pressure / MPa | Density <sup>a</sup> / g cm <sup>-3</sup> | Refractive index ( $n_{P_0}$ ) <sup>c</sup> | Area ( $D_{P_0}$ ) <sup>e</sup> | Abs ( $A_{P_0}$ ) <sup>f</sup> | Fluorescence quantum yield ( $\Phi_{P_0}$ ) <sup>g</sup> |
|----------------|-------------------------------------------|---------------------------------------------|---------------------------------|--------------------------------|----------------------------------------------------------|
| 0.1            | 1.479                                     | 1.443                                       | $1.074 \times 10^6$             | 0.077                          | 0.334                                                    |
| Pressure / MPa | Density <sup>b</sup> / g cm <sup>-3</sup> | Refractive index ( $n_P$ ) <sup>d</sup>     | Area ( $D_P$ ) <sup>e</sup>     | Abs ( $A_P$ ) <sup>f</sup>     | Fluorescence quantum yield ( $\Phi_P$ ) <sup>h</sup>     |
| 40             | 1.529                                     | 1.459                                       | $1.127 \times 10^6$             | 0.078                          | 0.356                                                    |
| 80             | 1.570                                     | 1.473                                       | $1.163 \times 10^6$             | 0.078                          | 0.372                                                    |
| 120            | 1.606                                     | 1.484                                       | $1.180 \times 10^6$             | 0.078                          | 0.383                                                    |
| 160            | 1.636                                     | 1.494                                       | $1.192 \times 10^6$             | 0.079                          | 0.392                                                    |
| 200            | 1.663                                     | 1.502                                       | $1.193 \times 10^6$             | 0.079                          | 0.396                                                    |
| 240            | 1.686                                     | 1.510                                       | $1.202 \times 10^6$             | 0.078                          | 0.404                                                    |
| 280            | 1.707                                     | 1.517                                       | $1.181 \times 10^6$             | 0.078                          | 0.402                                                    |
| 320            | 1.726                                     | 1.523                                       | $1.142 \times 10^6$             | 0.078                          | 0.392                                                    |

<sup>a</sup>Ref. 8. <sup>b</sup>Data calculated from the fitting results (Figure S17b and Table S2). <sup>c</sup>Ref. 6. <sup>d</sup>Data calculated using Eq. S2. <sup>e</sup>Data extracted from Figure 2b. <sup>f</sup>Data extracted from Figure S4b. <sup>g</sup>Measured using spectrofluorometer (FP-8500). <sup>h</sup>Data calculated using Eq. S1.

**Table S5. Relative Fluorescence Quantum Yields of [2]HA<sub>2</sub> in DCM**

| Pressure / MPa | Density <sup>a</sup> / g cm <sup>-3</sup> | Refractive index ( $n_{p_0}$ ) <sup>c</sup> | Area ( $D_{p_0}$ ) <sup>e</sup> | Abs ( $A_{p_0}$ ) <sup>f</sup> | Fluorescence quantum yield ( $\Phi_{p_0}$ ) <sup>g</sup> |
|----------------|-------------------------------------------|---------------------------------------------|---------------------------------|--------------------------------|----------------------------------------------------------|
| 0.1            | 1.308 <sup>a</sup>                        | 1.442                                       | 2.560×10 <sup>6</sup>           | 0.085                          | 0.360                                                    |

  

| Pressure / MPa | Density <sup>b</sup> / g cm <sup>-3</sup> | Refractive index ( $n_p$ ) <sup>d</sup> | Area ( $D_p$ ) <sup>e</sup> | Abs ( $A_p$ ) <sup>f</sup> | Fluorescence quantum yield ( $\Phi_p$ ) <sup>h</sup> |
|----------------|-------------------------------------------|-----------------------------------------|-----------------------------|----------------------------|------------------------------------------------------|
| 40             | 1.356                                     | 1.439                                   | 2.478×10 <sup>6</sup>       | 0.085                      | 0.354                                                |
| 80             | 1.395                                     | 1.453                                   | 2.391×10 <sup>6</sup>       | 0.085                      | 0.336                                                |
| 120            | 1.429                                     | 1.465                                   | 2.351×10 <sup>6</sup>       | 0.088                      | 0.350                                                |
| 160            | 1.458                                     | 1.475                                   | 2.284×10 <sup>6</sup>       | 0.085                      | 0.343                                                |
| 200            | 1.485                                     | 1.484                                   | 2.173×10 <sup>6</sup>       | 0.088                      | 0.318                                                |
| 240            | 1.509                                     | 1.492                                   | 2.019×10 <sup>6</sup>       | 0.088                      | 0.299                                                |
| 280            | 1.532                                     | 1.500                                   | 1.845×10 <sup>6</sup>       | 0.088                      | 0.276                                                |
| 320            | 1.553                                     | 1.508                                   | 1.668×10 <sup>6</sup>       | 0.088                      | 0.254                                                |

<sup>a</sup>Ref. 9. <sup>b</sup>Data calculated from the fitting results (Figure S17c and Table S2). <sup>c</sup>Ref. 6. <sup>d</sup>Data calculated using Eq. S2. <sup>e</sup>Data extracted from Figure 2c. <sup>f</sup>Data extracted from Figure S4c. <sup>g</sup>Measured using spectrofluorometer (FP-8500). <sup>h</sup>Data calculated using Eq. S1.

**Table S6. Quantum Yields, Fluorescence Lifetimes, and Kinetic Rate Constants of [2]HA<sub>2</sub>**

| Solvent    | $P / \text{MPa}$ | $\Phi_{\text{F}}$ | $\tau_{\text{F}} / \text{ns}$ | $\chi^2$ | $k_{\text{F}} / 10^7 \text{ s}^{-1}$ | $k_{\text{nr}} / 10^7 \text{ s}^{-1}$ |
|------------|------------------|-------------------|-------------------------------|----------|--------------------------------------|---------------------------------------|
| Toluene    | 0.1              | 0.334             | 9.1                           | 1.1      | 3.7                                  | 7.3                                   |
|            | 40               | 0.351             | 9.6                           | 1.1      | 3.7                                  | 6.8                                   |
|            | 80               | 0.366             | 10.0                          | 1.2      | 3.7                                  | 6.4                                   |
|            | 120              | 0.383             | 10.3                          | 1.1      | 3.7                                  | 6.0                                   |
|            | 160              | 0.400             | 10.7                          | 1.1      | 3.8                                  | 5.6                                   |
|            | 200              | 0.415             | 11.0                          | 1.2      | 3.8                                  | 5.3                                   |
|            | 240              | 0.425             | 11.3                          | 1.1      | 3.8                                  | 5.1                                   |
|            | 280              | 0.435             | 11.5                          | 1.2      | 3.8                                  | 4.9                                   |
|            | 320              | 0.441             | 11.7                          | 1.1      | 3.8                                  | 4.8                                   |
| Chloroform | 0.1              | 0.334             | 10.5                          | 1.2      | 3.2                                  | 6.4                                   |
|            | 40               | 0.356             | 10.6                          | 1.1      | 3.4                                  | 6.1                                   |
|            | 80               | 0.372             | 10.7                          | 1.1      | 3.5                                  | 5.9                                   |
|            | 120              | 0.383             | 10.8                          | 1.1      | 3.5                                  | 5.7                                   |
|            | 160              | 0.392             | 10.9                          | 1.1      | 3.6                                  | 5.6                                   |
|            | 200              | 0.396             | 11.0                          | 1.1      | 3.6                                  | 5.5                                   |
|            | 240              | 0.404             | 11.1                          | 1.2      | 3.6                                  | 5.4                                   |
|            | 280              | 0.402             | 11.2                          | 1.2      | 3.6                                  | 5.4                                   |
|            | 320              | 0.392             | 11.2                          | 1.2      | 3.5                                  | 5.4                                   |
| DCM        | 0.1              | 0.360             | 11.6                          | 1.3      | 3.1                                  | 5.5                                   |
|            | 40               | 0.354             | 11.6                          | 1.2      | 3.1                                  | 5.6                                   |
|            | 80               | 0.336             | 11.6                          | 1.2      | 2.9                                  | 5.7                                   |
|            | 120              | 0.350             | 11.7                          | 1.3      | 3.0                                  | 5.6                                   |
|            | 160              | 0.343             | 11.7                          | 1.2      | 2.9                                  | 5.6                                   |
|            | 200              | 0.318             | 11.8                          | 1.2      | 2.7                                  | 5.8                                   |
|            | 240              | 0.299             | 11.8                          | 1.2      | 2.5                                  | 5.9                                   |
|            | 280              | 0.276             | 11.8                          | 1.2      | 2.3                                  | 6.1                                   |
|            | 320              | 0.254             | 11.9                          | 1.2      | 2.1                                  | 6.3                                   |

## DFT Calculations

DFT calculations were carried out with Orca 5.0.3.<sup>11</sup> on a Windows computer. The structures were optimized by the hybrid DFT method at the (TD-)CAM-B3LYP/def2-SVP level. Solvent effects were incorporated using the implicit solvation model based on density (SMD).<sup>12</sup> Molecular van der Waals volumes were calculated using MultiWFN 3.8<sup>13</sup> with the Monte Carlo method.

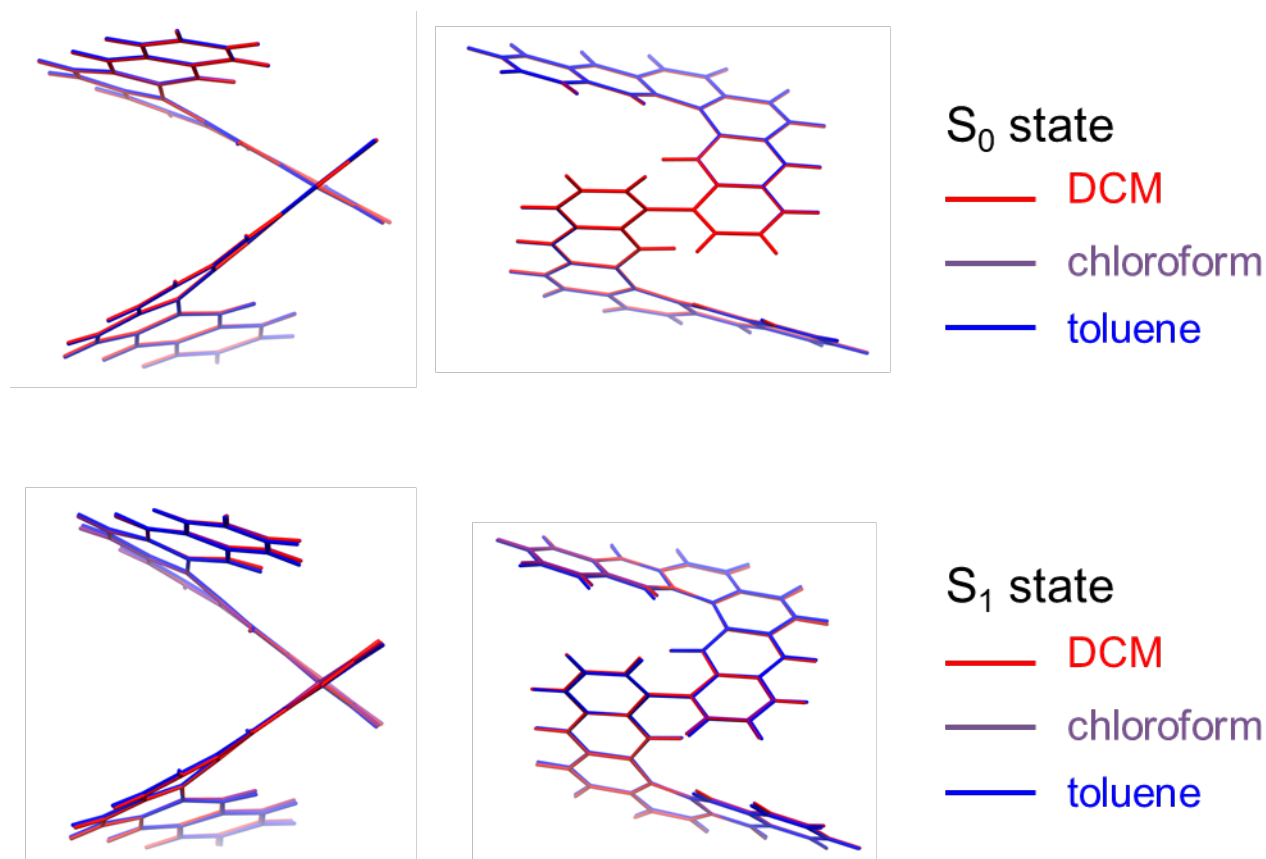

**Figure S18.** Calculated structures of **[2]HA<sub>2</sub>** with (*P,P<sub>a</sub>,P*) conformations in S<sub>0</sub> and S<sub>1</sub> states. The calculated structures in DCM (red), chloroform (purple), and toluene (blue) were superimposed for comparison.

<sup>11</sup> a) F. Neese, *Wiley Interdiscip. Rev.: Comput. Mol. Sci.* 2012, **2**, 73–78. b) F. Neese, *Wiley Interdiscip. Rev.: Comput. Mol. Sci.* 2017, **8**, e1327. c) F. Neese, F. Wennmohs, U. Becker and C. Riplinger, *J. Chem. Phys.* 2020, **152**, 224108.

<sup>12</sup> T. Lu and F. Chen, *J. Comput. Chem.* 2012, **33**, 580–592.

<sup>13</sup> A. V. Marenich, C. J. Cramer, D. G. Truhlar, *J. Phys. Chem. B* 2009, **113**, 6378–6396.

**Table S7. Calculated Molecular Volumes of [2]HA<sub>2</sub> in S<sub>0</sub> State**

|            | $P,P_a,P / \text{\AA}^3$ | $M,P_a,P / \text{\AA}^3$ | $M,P_a,M / \text{\AA}^3$ |
|------------|--------------------------|--------------------------|--------------------------|
| toluene    | 902.32                   | 900.48                   | 901.98                   |
| chloroform | 902.50                   | 900.50                   | 902.29                   |
| DCM        | 902.58                   | 900.52                   | 902.10                   |

**Table S8. Calculated Molecular Volumes of [2]HA<sub>2</sub> in S<sub>1</sub> State**

|            | $P,P_a,P / \text{\AA}^3$ | $M,P_a,P / \text{\AA}^3$ | $M,P_a,M / \text{\AA}^3$ |
|------------|--------------------------|--------------------------|--------------------------|
| toluene    | 902.20                   | 898.52                   | 897.00                   |
| chloroform | 902.48                   | 898.69                   | 897.15                   |
| DCM        | 902.54                   | 898.87                   | 897.22                   |

**Table S9. Calculated Relative Energies of [2]HA<sub>2</sub> in S<sub>0</sub> State**

|            | $P,P_a,P / \text{kJ mol}^{-1}$ | $M,P_a,P / \text{kJ mol}^{-1}$ | $M,P_a,M / \text{kJ mol}^{-1}$ |
|------------|--------------------------------|--------------------------------|--------------------------------|
| toluene    | 0                              | +0.80                          | -0.47                          |
| chloroform | 0                              | +0.98                          | -0.05                          |
| DCM        | 0                              | +1.11                          | +0.21                          |

**Table S10. Calculated Relative Energies of [2]HA<sub>2</sub> in S<sub>1</sub> State**

|            | $P,P_a,P / \text{kJ mol}^{-1}$ | $M,P_a,P / \text{kJ mol}^{-1}$ | $M,P_a,M / \text{kJ mol}^{-1}$ |
|------------|--------------------------------|--------------------------------|--------------------------------|
| toluene    | 0                              | +1.79                          | +1.73                          |
| chloroform | 0                              | +1.88                          | +2.11                          |
| DCM        | 0                              | +1.90                          | +2.29                          |



**Table S11. Cartesian Coordinates (Å) of Optimized Structure of [2]HA<sub>2</sub> (*M,P<sub>a</sub>,M*) Conformer in Toluene (S<sub>0</sub> State) Calculated by TD-DFT Method at CAM-B3LYP/def2-SVP Level**

| Label | Element | x       | y       | z       | Label | Element | x       | y       | z       |
|-------|---------|---------|---------|---------|-------|---------|---------|---------|---------|
| 1     | C       | -0.0892 | -1.6681 | 3.8528  | 42    | C       | -5.0026 | -2.9435 | -1.8985 |
| 2     | C       | 0.5749  | -2.9240 | 3.9156  | 43    | C       | -3.6015 | -3.0881 | -1.6243 |
| 3     | C       | 1.6928  | -3.1488 | 3.1671  | 44    | C       | -2.9012 | -2.0382 | -0.9250 |
| 4     | C       | 2.2006  | -2.1299 | 2.3059  | 45    | C       | -2.9108 | -4.1962 | -2.1089 |
| 5     | C       | 1.5233  | -0.8716 | 2.2194  | 46    | C       | -1.5195 | -4.3064 | -2.0037 |
| 6     | C       | 0.3572  | -0.6561 | 3.0412  | 47    | C       | -0.8019 | -3.2256 | -1.4035 |
| 7     | C       | 3.3770  | -2.3037 | 1.5680  | 48    | C       | -1.5079 | -2.1294 | -0.8828 |
| 8     | C       | 3.8782  | -1.3137 | 0.7277  | 49    | C       | -0.7904 | -5.4237 | -2.5153 |
| 9     | C       | 3.1423  | -0.0898 | 0.5332  | 50    | C       | 0.5735  | -5.4557 | -2.4450 |
| 10    | C       | 2.0126  | 0.1054  | 1.3343  | 51    | C       | 1.2914  | -4.3719 | -1.8621 |
| 11    | C       | 5.1667  | -1.4736 | 0.1164  | 52    | C       | 0.6253  | -3.2905 | -1.3588 |
| 12    | C       | 5.7196  | -0.4561 | -0.5815 | 53    | H       | -0.9762 | -1.5051 | 4.4690  |
| 13    | C       | 4.9879  | 0.7523  | -0.8458 | 54    | H       | 0.1846  | -3.7019 | 4.5753  |
| 14    | C       | 3.6663  | 0.9036  | -0.4076 | 55    | H       | 2.2183  | -4.1053 | 3.2147  |
| 15    | C       | 5.6473  | 1.7993  | -1.5770 | 56    | H       | 3.9415  | -3.2322 | 1.6838  |
| 16    | C       | 5.0053  | 2.9458  | -1.8957 | 57    | H       | 1.5034  | 1.0641  | 1.3219  |
| 17    | C       | 3.6035  | 3.0900  | -1.6244 | 58    | H       | 5.7083  | -2.4087 | 0.2750  |
| 18    | C       | 2.9016  | 2.0379  | -0.9303 | 59    | H       | 6.7278  | -0.5450 | -0.9924 |
| 19    | C       | 2.9134  | 4.1992  | -2.1074 | 60    | H       | 6.6957  | 1.6541  | -1.8472 |
| 20    | C       | 1.5218  | 4.3082  | -2.0057 | 61    | H       | 5.5223  | 3.7552  | -2.4157 |
| 21    | C       | 0.8029  | 3.2245  | -1.4120 | 62    | H       | 3.4741  | 4.9866  | -2.6176 |
| 22    | C       | 1.5082  | 2.1272  | -0.8930 | 63    | H       | 0.9167  | 1.3077  | -0.4948 |
| 23    | C       | 0.7934  | 5.4269  | -2.5152 | 64    | H       | 1.3495  | 6.2533  | -2.9646 |
| 24    | C       | -0.5708 | 5.4575  | -2.4492 | 65    | H       | -1.1202 | 6.3154  | -2.8435 |
| 25    | C       | -1.2898 | 4.3708  | -1.8732 | 66    | H       | -2.3807 | 4.4081  | -1.8358 |
| 26    | C       | -0.6245 | 3.2880  | -1.3720 | 67    | H       | -1.1738 | 2.4540  | -0.9295 |
| 27    | C       | 0.0910  | 1.6698  | 3.8527  | 68    | H       | 0.9804  | 1.5080  | 4.4658  |
| 28    | C       | -0.5748 | 2.9248  | 3.9176  | 69    | H       | -0.1833 | 3.7032  | 4.5760  |
| 29    | C       | -1.6952 | 3.1484  | 3.1724  | 70    | H       | -2.2213 | 4.1045  | 3.2214  |
| 30    | C       | -2.2043 | 2.1292  | 2.3125  | 71    | H       | -3.9469 | 3.2299  | 1.6919  |
| 31    | C       | -1.5262 | 0.8715  | 2.2251  | 72    | H       | -1.5060 | -1.0645 | 1.3290  |
| 32    | C       | -0.3571 | 0.6573  | 3.0428  | 73    | H       | -5.7128 | 2.4057  | 0.2823  |
| 33    | C       | -3.3816 | 2.3018  | 1.5757  | 74    | H       | -6.7289 | 0.5431  | -0.9894 |
| 34    | C       | -3.8820 | 1.3117  | 0.7350  | 75    | H       | -6.6937 | -1.6528 | -1.8498 |
| 35    | C       | -3.1454 | 0.0883  | 0.5400  | 76    | H       | -5.5182 | -3.7515 | -2.4221 |
| 36    | C       | -2.0158 | -0.1062 | 1.3411  | 77    | H       | -3.4705 | -4.9815 | -2.6232 |
| 37    | C       | -5.1701 | 1.4712  | 0.1229  | 78    | H       | -0.9162 | -1.3130 | -0.4783 |
| 38    | C       | -5.7212 | 0.4544  | -0.5773 | 79    | H       | -1.3457 | -6.2478 | -2.9697 |
| 39    | C       | -4.9883 | -0.7530 | -0.8426 | 80    | H       | 1.1235  | -6.3124 | -2.8409 |
| 40    | C       | -3.6674 | -0.9047 | -0.4023 | 81    | H       | 2.3821  | -4.4103 | -1.8211 |
| 41    | C       | -5.6458 | -1.7983 | -1.5778 | 82    | H       | 1.1739  | -2.4590 | -0.9109 |

**Table S12. Cartesian Coordinates (Å) of Optimized Structure of [2]HA<sub>2</sub> (*M,P<sub>a</sub>,M*) Conformer in Chloroform (S<sub>0</sub> State) Calculated by TD-DFT Method at CAM-B3LYP/def2-SVP Level**

| Label | Element | x       | y       | z       | Label | Element | x       | y       | z       |
|-------|---------|---------|---------|---------|-------|---------|---------|---------|---------|
| 1     | C       | -0.0930 | -1.6705 | 3.8445  | 42    | C       | -5.0267 | -2.9500 | -1.8811 |
| 2     | C       | 0.5758  | -2.9238 | 3.9145  | 43    | C       | -3.6220 | -3.0879 | -1.6206 |
| 3     | C       | 1.7031  | -3.1439 | 3.1782  | 44    | C       | -2.9203 | -2.0366 | -0.9245 |
| 4     | C       | 2.2146  | -2.1230 | 2.3213  | 45    | C       | -2.9302 | -4.1908 | -2.1163 |
| 5     | C       | 1.5324  | -0.8676 | 2.2268  | 46    | C       | -1.5370 | -4.2929 | -2.0252 |
| 6     | C       | 0.3579  | -0.6562 | 3.0377  | 47    | C       | -0.8193 | -3.2096 | -1.4291 |
| 7     | C       | 3.3990  | -2.2930 | 1.5950  | 48    | C       | -1.5259 | -2.1190 | -0.8970 |
| 8     | C       | 3.9022  | -1.3022 | 0.7565  | 49    | C       | -0.8070 | -5.4050 | -2.5478 |
| 9     | C       | 3.1614  | -0.0828 | 0.5519  | 50    | C       | 0.5580  | -5.4295 | -2.4914 |
| 10    | C       | 2.0242  | 0.1095  | 1.3431  | 51    | C       | 1.2760  | -4.3428 | -1.9131 |
| 11    | C       | 5.1968  | -1.4581 | 0.1565  | 52    | C       | 0.6090  | -3.2662 | -1.4000 |
| 12    | C       | 5.7499  | -0.4406 | -0.5417 | 53    | H       | -0.9863 | -1.5114 | 4.4528  |
| 13    | C       | 5.0131  | 0.7625  | -0.8173 | 54    | H       | 0.1820  | -3.7028 | 4.5709  |
| 14    | C       | 3.6874  | 0.9092  | -0.3896 | 55    | H       | 2.2334  | -4.0975 | 3.2323  |
| 15    | C       | 5.6729  | 1.8087  | -1.5498 | 56    | H       | 3.9670  | -3.2186 | 1.7175  |
| 16    | C       | 5.0272  | 2.9501  | -1.8802 | 57    | H       | 1.5091  | 1.0649  | 1.3225  |
| 17    | C       | 3.6224  | 3.0881  | -1.6201 | 58    | H       | 5.7414  | -2.3901 | 0.3237  |
| 18    | C       | 2.9204  | 2.0366  | -0.9244 | 59    | H       | 6.7618  | -0.5252 | -0.9446 |
| 19    | C       | 2.9308  | 4.1911  | -2.1158 | 60    | H       | 6.7240  | 1.6667  | -1.8114 |
| 20    | C       | 1.5377  | 4.2932  | -2.0253 | 61    | H       | 5.5433  | 3.7595  | -2.4013 |
| 21    | C       | 0.8197  | 3.2097  | -1.4297 | 62    | H       | 3.4917  | 4.9780  | -2.6266 |
| 22    | C       | 1.5260  | 2.1191  | -0.8974 | 63    | H       | 0.9345  | 1.3005  | -0.4969 |
| 23    | C       | 0.8079  | 5.4053  | -2.5480 | 64    | H       | 1.3640  | 6.2312  | -2.9985 |
| 24    | C       | -0.5572 | 5.4298  | -2.4922 | 65    | H       | -1.1081 | 6.2825  | -2.8958 |
| 25    | C       | -1.2754 | 4.3429  | -1.9145 | 66    | H       | -2.3669 | 4.3757  | -1.8859 |
| 26    | C       | -0.6086 | 3.2663  | -1.4013 | 67    | H       | -1.1564 | 2.4314  | -0.9585 |
| 27    | C       | 0.0923  | 1.6704  | 3.8446  | 68    | H       | 0.9856  | 1.5114  | 4.4530  |
| 28    | C       | -0.5766 | 2.9236  | 3.9147  | 69    | H       | -0.1828 | 3.7026  | 4.5712  |
| 29    | C       | -1.7039 | 3.1438  | 3.1784  | 70    | H       | -2.2342 | 4.0974  | 3.2325  |
| 30    | C       | -2.2153 | 2.1229  | 2.3214  | 71    | H       | -3.9677 | 3.2184  | 1.7175  |
| 31    | C       | -1.5330 | 0.8676  | 2.2269  | 72    | H       | -1.5094 | -1.0649 | 1.3224  |
| 32    | C       | -0.3585 | 0.6562  | 3.0378  | 73    | H       | -5.7419 | 2.3897  | 0.3234  |
| 33    | C       | -3.3997 | 2.2928  | 1.5950  | 74    | H       | -6.7619 | 0.5249  | -0.9452 |
| 34    | C       | -3.9027 | 1.3020  | 0.7565  | 75    | H       | -6.7237 | -1.6668 | -1.8125 |
| 35    | C       | -3.1617 | 0.0827  | 0.5518  | 76    | H       | -5.5426 | -3.7594 | -2.4025 |
| 36    | C       | -2.0246 | -0.1096 | 1.3431  | 77    | H       | -3.4908 | -4.9777 | -2.6273 |
| 37    | C       | -5.1972 | 1.4578  | 0.1563  | 78    | H       | -0.9345 | -1.3005 | -0.4960 |
| 38    | C       | -5.7501 | 0.4404  | -0.5422 | 79    | H       | -1.3629 | -6.2308 | -2.9986 |
| 39    | C       | -5.0131 | -0.7626 | -0.8179 | 80    | H       | 1.1091  | -6.2821 | -2.8949 |
| 40    | C       | -3.6874 | -0.9092 | -0.3898 | 81    | H       | 2.3674  | -4.3756 | -1.8841 |
| 41    | C       | -5.6726 | -1.8088 | -1.5507 | 82    | H       | 1.1566  | -2.4315 | -0.9567 |

**Table S13. Cartesian Coordinates (Å) of Optimized Structure of [2]HA<sub>2</sub> (*M,P<sub>a</sub>,M*) Conformer in DCM (S<sub>0</sub> State) Calculated by TD-DFT Method at CAM-B3LYP/def2-SVP Level**

| Label | Element | x       | y       | z       | Label | Element | x       | y       | z       |
|-------|---------|---------|---------|---------|-------|---------|---------|---------|---------|
| 1     | C       | -0.0867 | -1.6682 | 3.8525  | 42    | C       | -4.9996 | -2.9449 | -1.9066 |
| 2     | C       | 0.5795  | -2.9235 | 3.9161  | 43    | C       | -3.5993 | -3.0925 | -1.6274 |
| 3     | C       | 1.6971  | -3.1484 | 3.1662  | 44    | C       | -2.8967 | -2.0408 | -0.9324 |
| 4     | C       | 2.2019  | -2.1294 | 2.3026  | 45    | C       | -2.9117 | -4.2070 | -2.1031 |
| 5     | C       | 1.5229  | -0.8718 | 2.2159  | 46    | C       | -1.5208 | -4.3210 | -1.9925 |
| 6     | C       | 0.3576  | -0.6565 | 3.0389  | 47    | C       | -0.8004 | -3.2377 | -1.3994 |
| 7     | C       | 3.3770  | -2.3037 | 1.5622  | 48    | C       | -1.5034 | -2.1349 | -0.8878 |
| 8     | C       | 3.8749  | -1.3135 | 0.7197  | 49    | C       | -0.7949 | -5.4465 | -2.4920 |
| 9     | C       | 3.1382  | -0.0896 | 0.5266  | 50    | C       | 0.5691  | -5.4837 | -2.4166 |
| 10    | C       | 2.0093  | 0.1052  | 1.3291  | 51    | C       | 1.2901  | -4.3968 | -1.8417 |
| 11    | C       | 5.1616  | -1.4753 | 0.1043  | 52    | C       | 0.6270  | -3.3074 | -1.3508 |
| 12    | C       | 5.7132  | -0.4586 | -0.5967 | 53    | H       | -0.9732 | -1.5065 | 4.4701  |
| 13    | C       | 4.9811  | 0.7507  | -0.8581 | 54    | H       | 0.1910  | -3.7005 | 4.5781  |
| 14    | C       | 3.6609  | 0.9040  | -0.4151 | 55    | H       | 2.2250  | -4.1036 | 3.2145  |
| 15    | C       | 5.6409  | 1.7968  | -1.5912 | 56    | H       | 3.9425  | -3.2319 | 1.6769  |
| 16    | C       | 5.0008  | 2.9460  | -1.9055 | 57    | H       | 1.4969  | 1.0620  | 1.3154  |
| 17    | C       | 3.6003  | 3.0935  | -1.6273 | 58    | H       | 5.7020  | -2.4114 | 0.2621  |
| 18    | C       | 2.8972  | 2.0417  | -0.9330 | 59    | H       | 6.7198  | -0.5475 | -1.0115 |
| 19    | C       | 2.9131  | 4.2079  | -2.1035 | 60    | H       | 6.6878  | 1.6478  | -1.8656 |
| 20    | C       | 1.5220  | 4.3217  | -1.9945 | 61    | H       | 5.5172  | 3.7554  | -2.4263 |
| 21    | C       | 0.8012  | 3.2381  | -1.4023 | 62    | H       | 3.4749  | 4.9950  | -2.6129 |
| 22    | C       | 1.5038  | 2.1355  | -0.8896 | 63    | H       | 0.9092  | 1.3185  | -0.4904 |
| 23    | C       | 0.7963  | 5.4468  | -2.4951 | 64    | H       | 1.3549  | 6.2726  | -2.9427 |
| 24    | C       | -0.5678 | 5.4835  | -2.4216 | 65    | H       | -1.1157 | 6.3460  | -2.8080 |
| 25    | C       | -1.2892 | 4.3963  | -1.8478 | 66    | H       | -2.3798 | 4.4393  | -1.8049 |
| 26    | C       | -0.6262 | 3.3072  | -1.3558 | 67    | H       | -1.1761 | 2.4724  | -0.9152 |
| 27    | C       | 0.0866  | 1.6681  | 3.8534  | 68    | H       | 0.9736  | 1.5066  | 4.4703  |
| 28    | C       | -0.5806 | 2.9228  | 3.9185  | 69    | H       | -0.1922 | 3.6996  | 4.5808  |
| 29    | C       | -1.6990 | 3.1473  | 3.1698  | 70    | H       | -2.2277 | 4.1021  | 3.2193  |
| 30    | C       | -2.2036 | 2.1287  | 2.3057  | 71    | H       | -3.9453 | 3.2304  | 1.6816  |
| 31    | C       | -1.5236 | 0.8717  | 2.2174  | 72    | H       | -1.4966 | -1.0613 | 1.3156  |
| 32    | C       | -0.3575 | 0.6567  | 3.0394  | 73    | H       | -5.7040 | 2.4103  | 0.2654  |
| 33    | C       | -3.3792 | 2.3027  | 1.5660  | 74    | H       | -6.7202 | 0.5473  | -1.0108 |
| 34    | C       | -3.8764 | 1.3130  | 0.7224  | 75    | H       | -6.6868 | -1.6470 | -1.8671 |
| 35    | C       | -3.1389 | 0.0897  | 0.5281  | 76    | H       | -5.5155 | -3.7542 | -2.4282 |
| 36    | C       | -2.0097 | -0.1049 | 1.3302  | 77    | H       | -3.4732 | -4.9939 | -2.6131 |
| 37    | C       | -5.1630 | 1.4746  | 0.1068  | 78    | H       | -0.9091 | -1.3178 | -0.4882 |
| 38    | C       | -5.7137 | 0.4584  | -0.5956 | 79    | H       | -1.3531 | -6.2721 | -2.9403 |
| 39    | C       | -4.9810 | -0.7503 | -0.8579 | 80    | H       | 1.1172  | -6.3465 | -2.8021 |
| 40    | C       | -3.6609 | -0.9035 | -0.4145 | 81    | H       | 2.3807  | -4.4404 | -1.7972 |
| 41    | C       | -5.6401 | -1.7960 | -1.5921 | 82    | H       | 1.1766  | -2.4729 | -0.9092 |

**Table S14. Cartesian Coordinates (Å) of Optimized Structure of [2]HA<sub>2</sub> (*P,P<sub>a</sub>,M*) Conformer in Toluene (S<sub>0</sub> State) Calculated by TD-DFT Method at CAM-B3LYP/def2-SVP Level**

| Label | Element | x       | y       | z       | Label | Element | x       | y       | z       |
|-------|---------|---------|---------|---------|-------|---------|---------|---------|---------|
| 1     | C       | -1.5601 | -2.0253 | 2.9637  | 42    | C       | -4.0423 | 2.5976  | -2.9364 |
| 2     | C       | -2.1155 | -3.2748 | 2.5712  | 43    | C       | -4.1812 | 1.4040  | -2.1521 |
| 3     | C       | -1.5188 | -4.0150 | 1.5932  | 44    | C       | -3.5118 | 1.3066  | -0.8775 |
| 4     | C       | -0.3270 | -3.5480 | 0.9612  | 45    | C       | -5.0248 | 0.3846  | -2.5861 |
| 5     | C       | 0.2318  | -2.2864 | 1.3429  | 46    | C       | -5.3141 | -0.7277 | -1.7878 |
| 6     | C       | -0.4231 | -1.5263 | 2.3801  | 47    | C       | -4.7459 | -0.7818 | -0.4772 |
| 7     | C       | 0.3558  | -4.3185 | 0.0139  | 48    | C       | -3.8645 | 0.2292  | -0.0610 |
| 8     | C       | 1.5405  | -3.8884 | -0.5756 | 49    | C       | -6.1891 | -1.7757 | -2.2090 |
| 9     | C       | 2.0650  | -2.5788 | -0.2787 | 50    | C       | -6.4932 | -2.8089 | -1.3688 |
| 10    | C       | 1.4052  | -1.8408 | 0.7094  | 51    | C       | -5.9441 | -2.8546 | -0.0550 |
| 11    | C       | 2.2895  | -4.7844 | -1.4092 | 52    | C       | -5.0989 | -1.8720 | 0.3772  |
| 12    | C       | 3.5207  | -4.4370 | -1.8454 | 53    | H       | -2.0503 | -1.4501 | 3.7525  |
| 13    | C       | 4.0552  | -3.1252 | -1.6044 | 54    | H       | -3.0192 | -3.6368 | 3.0663  |
| 14    | C       | 3.3004  | -2.1500 | -0.9401 | 55    | H       | -1.9319 | -4.9787 | 1.2868  |
| 15    | C       | 5.3870  | -2.8430 | -2.0645 | 56    | H       | -0.0280 | -5.3101 | -0.2385 |
| 16    | C       | 5.9442  | -1.6225 | -1.8982 | 57    | H       | 1.8299  | -0.9036 | 1.0553  |
| 17    | C       | 5.1650  | -0.5373 | -1.3744 | 58    | H       | 1.8686  | -5.7677 | -1.6305 |
| 18    | C       | 3.8056  | -0.7753 | -0.9521 | 59    | H       | 4.1284  | -5.1403 | -2.4192 |
| 19    | C       | 5.6950  | 0.7503  | -1.3547 | 60    | H       | 5.9516  | -3.6556 | -2.5271 |
| 20    | C       | 4.9244  | 1.8632  | -0.9995 | 61    | H       | 6.9723  | -1.4246 | -2.2094 |
| 21    | C       | 3.5451  | 1.6547  | -0.6866 | 62    | H       | 6.7328  | 0.8972  | -1.6646 |
| 22    | C       | 3.0268  | 0.3496  | -0.6709 | 63    | H       | 1.9636  | 0.2450  | -0.4716 |
| 23    | C       | 5.4459  | 3.1934  | -0.9859 | 64    | H       | 6.5023  | 3.3441  | -1.2215 |
| 24    | C       | 4.6383  | 4.2548  | -0.6899 | 65    | H       | 5.0449  | 5.2686  | -0.6813 |
| 25    | C       | 3.2590  | 4.0510  | -0.3970 | 66    | H       | 2.6250  | 4.9108  | -0.1698 |
| 26    | C       | 2.7287  | 2.7918  | -0.3988 | 67    | H       | 1.6725  | 2.6345  | -0.1703 |
| 27    | C       | 1.0393  | -0.2051 | 3.8818  | 68    | H       | 1.3587  | -1.1508 | 4.3249  |
| 28    | C       | 1.5717  | 1.0116  | 4.3906  | 69    | H       | 2.2900  | 0.9776  | 5.2125  |
| 29    | C       | 1.1905  | 2.2062  | 3.8542  | 70    | H       | 1.5977  | 3.1475  | 4.2305  |
| 30    | C       | 0.2544  | 2.2466  | 2.7774  | 71    | H       | 0.3574  | 4.3778  | 2.4955  |
| 31    | C       | -0.2949 | 1.0269  | 2.2679  | 72    | H       | -1.5851 | 0.1408  | 0.8189  |
| 32    | C       | 0.1329  | -0.2210 | 2.8522  | 73    | H       | -0.7160 | 5.6283  | 0.7536  |
| 33    | C       | -0.1073 | 3.4479  | 2.1581  | 74    | H       | -2.0401 | 5.6591  | -1.3364 |
| 34    | C       | -0.9975 | 3.4926  | 1.0893  | 75    | H       | -3.2963 | 4.5892  | -3.0146 |
| 35    | C       | -1.6380 | 2.2861  | 0.6280  | 76    | H       | -4.5539 | 2.6514  | -3.8999 |
| 36    | C       | -1.2221 | 1.0850  | 1.2122  | 77    | H       | -5.5047 | 0.4784  | -3.5636 |
| 37    | C       | -1.2055 | 4.7246  | 0.3836  | 78    | H       | -3.4906 | 0.1660  | 0.9576  |
| 38    | C       | -1.9350 | 4.7409  | -0.7544 | 79    | H       | -6.6147 | -1.7306 | -3.2144 |
| 39    | C       | -2.6256 | 3.5680  | -1.2153 | 80    | H       | -7.1646 | -3.6051 | -1.6979 |
| 40    | C       | -2.5929 | 2.3760  | -0.4801 | 81    | H       | -6.2037 | -3.6845 | 0.6060  |
| 41    | C       | -3.3490 | 3.6532  | -2.4541 | 82    | H       | -4.6716 | -1.9073 | 1.3815  |

**Table S15. Cartesian Coordinates (Å) of Optimized Structure of [2]HA<sub>2</sub> (*P,P<sub>a</sub>,M*) Conformer in Chloroform (S<sub>0</sub> State) Calculated by TD-DFT Method at CAM-B3LYP/def2-SVP Level**

| Label | Element | x       | y       | z       | Label | Element | x       | y       | z       |
|-------|---------|---------|---------|---------|-------|---------|---------|---------|---------|
| 1     | C       | -1.5625 | -2.0274 | 2.9573  | 42    | C       | -4.0449 | 2.5878  | -2.9424 |
| 2     | C       | -2.1173 | -3.2767 | 2.5623  | 43    | C       | -4.1860 | 1.3972  | -2.1534 |
| 3     | C       | -1.5185 | -4.0164 | 1.5848  | 44    | C       | -3.5161 | 1.3028  | -0.8785 |
| 4     | C       | -0.3254 | -3.5481 | 0.9557  | 45    | C       | -5.0321 | 0.3780  | -2.5837 |
| 5     | C       | 0.2326  | -2.2867 | 1.3397  | 46    | C       | -5.3237 | -0.7305 | -1.7802 |
| 6     | C       | -0.4242 | -1.5277 | 2.3768  | 47    | C       | -4.7557 | -0.7805 | -0.4691 |
| 7     | C       | 0.3585  | -4.3176 | 0.0079  | 48    | C       | -3.8712 | 0.2297  | -0.0570 |
| 8     | C       | 1.5437  | -3.8857 | -0.5801 | 49    | C       | -6.2011 | -1.7784 | -2.1977 |
| 9     | C       | 2.0676  | -2.5762 | -0.2807 | 50    | C       | -6.5077 | -2.8074 | -1.3528 |
| 10    | C       | 1.4066  | -1.8397 | 0.7079  | 51    | C       | -5.9594 | -2.8486 | -0.0381 |
| 11    | C       | 2.2926  | -4.7808 | -1.4152 | 52    | C       | -5.1120 | -1.8660 | 0.3906  |
| 12    | C       | 3.5235  | -4.4320 | -1.8520 | 53    | H       | -2.0557 | -1.4533 | 3.7451  |
| 13    | C       | 4.0574  | -3.1201 | -1.6089 | 54    | H       | -3.0225 | -3.6384 | 3.0550  |
| 14    | C       | 3.3032  | -2.1461 | -0.9416 | 55    | H       | -1.9304 | -4.9801 | 1.2765  |
| 15    | C       | 5.3889  | -2.8376 | -2.0707 | 56    | H       | -0.0247 | -5.3090 | -0.2463 |
| 16    | C       | 5.9469  | -1.6175 | -1.9026 | 57    | H       | 1.8295  | -0.9022 | 1.0550  |
| 17    | C       | 5.1686  | -0.5334 | -1.3743 | 58    | H       | 1.8715  | -5.7639 | -1.6372 |
| 18    | C       | 3.8095  | -0.7714 | -0.9503 | 59    | H       | 4.1318  | -5.1337 | -2.4272 |
| 19    | C       | 5.7007  | 0.7536  | -1.3516 | 60    | H       | 5.9519  | -3.6499 | -2.5360 |
| 20    | C       | 4.9317  | 1.8661  | -0.9907 | 61    | H       | 6.9745  | -1.4185 | -2.2148 |
| 21    | C       | 3.5526  | 1.6580  | -0.6757 | 62    | H       | 6.7382  | 0.9001  | -1.6628 |
| 22    | C       | 3.0323  | 0.3535  | -0.6637 | 63    | H       | 1.9695  | 0.2507  | -0.4611 |
| 23    | C       | 5.4554  | 3.1957  | -0.9728 | 64    | H       | 6.5115  | 3.3455  | -1.2103 |
| 24    | C       | 4.6496  | 4.2570  | -0.6702 | 65    | H       | 5.0573  | 5.2704  | -0.6577 |
| 25    | C       | 3.2703  | 4.0538  | -0.3750 | 66    | H       | 2.6385  | 4.9139  | -0.1422 |
| 26    | C       | 2.7380  | 2.7951  | -0.3814 | 67    | H       | 1.6821  | 2.6375  | -0.1515 |
| 27    | C       | 1.0372  | -0.2051 | 3.8794  | 68    | H       | 1.3566  | -1.1499 | 4.3249  |
| 28    | C       | 1.5703  | 1.0125  | 4.3863  | 69    | H       | 2.2881  | 0.9791  | 5.2089  |
| 29    | C       | 1.1906  | 2.2067  | 3.8472  | 70    | H       | 1.5984  | 3.1487  | 4.2214  |
| 30    | C       | 0.2546  | 2.2454  | 2.7699  | 71    | H       | 0.3613  | 4.3764  | 2.4826  |
| 31    | C       | -0.2962 | 1.0251  | 2.2632  | 72    | H       | -1.5908 | 0.1372  | 0.8190  |
| 32    | C       | 0.1310  | -0.2222 | 2.8495  | 73    | H       | -0.7073 | 5.6227  | 0.7357  |
| 33    | C       | -0.1050 | 3.4463  | 2.1478  | 74    | H       | -2.0330 | 5.6500  | -1.3551 |
| 34    | C       | -0.9952 | 3.4891  | 1.0787  | 75    | H       | -3.2940 | 4.5781  | -3.0274 |
| 35    | C       | -1.6384 | 2.2824  | 0.6216  | 76    | H       | -4.5572 | 2.6388  | -3.9057 |
| 36    | C       | -1.2247 | 1.0819  | 1.2085  | 77    | H       | -5.5119 | 0.4690  | -3.5615 |
| 37    | C       | -1.2000 | 4.7195  | 0.3688  | 78    | H       | -3.4971 | 0.1685  | 0.9618  |
| 38    | C       | -1.9300 | 4.7339  | -0.7692 | 79    | H       | -6.6261 | -1.7361 | -3.2035 |
| 39    | C       | -2.6243 | 3.5609  | -1.2253 | 80    | H       | -7.1807 | -3.6038 | -1.6786 |
| 40    | C       | -2.5941 | 2.3713  | -0.4859 | 81    | H       | -6.2217 | -3.6750 | 0.6264  |
| 41    | C       | -3.3486 | 3.6437  | -2.4642 | 82    | H       | -4.6864 | -1.8968 | 1.3960  |

**Table S16. Cartesian Coordinates (Å) of Optimized Structure of [2]HA<sub>2</sub> (*P,P<sub>a</sub>,M*) Conformer in DCM (S<sub>0</sub> State) Calculated by TD-DFT Method at CAM-B3LYP/def2-SVP Level**

| Label | Element | x       | y       | z       | Label | Element | x       | y       | z       |
|-------|---------|---------|---------|---------|-------|---------|---------|---------|---------|
| 1     | C       | -1.5645 | -2.0253 | 2.9500  | 42    | C       | -4.0574 | 2.5857  | -2.9419 |
| 2     | C       | -2.1192 | -3.2745 | 2.5538  | 43    | C       | -4.1968 | 1.3955  | -2.1516 |
| 3     | C       | -1.5186 | -4.0149 | 1.5777  | 44    | C       | -3.5242 | 1.3016  | -0.8780 |
| 4     | C       | -0.3240 | -3.5470 | 0.9510  | 45    | C       | -5.0439 | 0.3760  | -2.5800 |
| 5     | C       | 0.2340  | -2.2857 | 1.3361  | 46    | C       | -5.3335 | -0.7321 | -1.7752 |
| 6     | C       | -0.4245 | -1.5263 | 2.3720  | 47    | C       | -4.7630 | -0.7816 | -0.4650 |
| 7     | C       | 0.3611  | -4.3167 | 0.0041  | 48    | C       | -3.8775 | 0.2289  | -0.0550 |
| 8     | C       | 1.5472  | -3.8847 | -0.5824 | 49    | C       | -6.2116 | -1.7805 | -2.1908 |
| 9     | C       | 2.0714  | -2.5755 | -0.2818 | 50    | C       | -6.5161 | -2.8095 | -1.3448 |
| 10    | C       | 1.4092  | -1.8390 | 0.7062  | 51    | C       | -5.9653 | -2.8500 | -0.0309 |
| 11    | C       | 2.2962  | -4.7800 | -1.4174 | 52    | C       | -5.1174 | -1.8668 | 0.3960  |
| 12    | C       | 3.5274  | -4.4315 | -1.8539 | 53    | H       | -2.0598 | -1.4508 | 3.7361  |
| 13    | C       | 4.0616  | -3.1197 | -1.6097 | 54    | H       | -3.0260 | -3.6352 | 3.0443  |
| 14    | C       | 3.3081  | -2.1457 | -0.9414 | 55    | H       | -1.9300 | -4.9786 | 1.2686  |
| 15    | C       | 5.3935  | -2.8381 | -2.0717 | 56    | H       | -0.0221 | -5.3079 | -0.2510 |
| 16    | C       | 5.9527  | -1.6186 | -1.9026 | 57    | H       | 1.8312  | -0.9013 | 1.0538  |
| 17    | C       | 5.1755  | -0.5345 | -1.3724 | 58    | H       | 1.8744  | -5.7628 | -1.6398 |
| 18    | C       | 3.8161  | -0.7714 | -0.9481 | 59    | H       | 4.1360  | -5.1328 | -2.4292 |
| 19    | C       | 5.7098  | 0.7517  | -1.3478 | 60    | H       | 5.9551  | -3.6508 | -2.5380 |
| 20    | C       | 4.9425  | 1.8646  | -0.9839 | 61    | H       | 6.9804  | -1.4199 | -2.2148 |
| 21    | C       | 3.5633  | 1.6580  | -0.6680 | 62    | H       | 6.7473  | 0.8971  | -1.6591 |
| 22    | C       | 3.0408  | 0.3542  | -0.6584 | 63    | H       | 1.9781  | 0.2532  | -0.4543 |
| 23    | C       | 5.4687  | 3.1934  | -0.9633 | 64    | H       | 6.5248  | 3.3417  | -1.2017 |
| 24    | C       | 4.6649  | 4.2554  | -0.6569 | 65    | H       | 5.0741  | 5.2681  | -0.6421 |
| 25    | C       | 3.2853  | 4.0536  | -0.3606 | 66    | H       | 2.6554  | 4.9143  | -0.1244 |
| 26    | C       | 2.7508  | 2.7958  | -0.3698 | 67    | H       | 1.6948  | 2.6390  | -0.1390 |
| 27    | C       | 1.0378  | -0.2024 | 3.8734  | 68    | H       | 1.3583  | -1.1467 | 4.3193  |
| 28    | C       | 1.5714  | 1.0158  | 4.3787  | 69    | H       | 2.2900  | 0.9831  | 5.2006  |
| 29    | C       | 1.1910  | 2.2098  | 3.8390  | 70    | H       | 1.5988  | 3.1523  | 4.2118  |
| 30    | C       | 0.2534  | 2.2473  | 2.7628  | 71    | H       | 0.3599  | 4.3783  | 2.4732  |
| 31    | C       | -0.2982 | 1.0264  | 2.2581  | 72    | H       | -1.5964 | 0.1371  | 0.8181  |
| 32    | C       | 0.1302  | -0.2205 | 2.8445  | 73    | H       | -0.7098 | 5.6224  | 0.7265  |
| 33    | C       | -0.1068 | 3.4478  | 2.1401  | 74    | H       | -2.0404 | 5.6482  | -1.3622 |
| 34    | C       | -0.9987 | 3.4894  | 1.0723  | 75    | H       | -3.3061 | 4.5761  | -3.0295 |
| 35    | C       | -1.6431 | 2.2823  | 0.6176  | 76    | H       | -4.5721 | 2.6359  | -3.9040 |
| 36    | C       | -1.2288 | 1.0822  | 1.2051  | 77    | H       | -5.5256 | 0.4666  | -3.5569 |
| 37    | C       | -1.2041 | 4.7193  | 0.3614  | 78    | H       | -3.5013 | 0.1673  | 0.9629  |
| 38    | C       | -1.9366 | 4.7329  | -0.7753 | 79    | H       | -6.6385 | -1.7383 | -3.1959 |
| 39    | C       | -2.6325 | 3.5595  | -1.2284 | 80    | H       | -7.1895 | -3.6063 | -1.6689 |
| 40    | C       | -2.6011 | 2.3704  | -0.4881 | 81    | H       | -6.2262 | -3.6762 | 0.6344  |
| 41    | C       | -3.3597 | 3.6419  | -2.4659 | 82    | H       | -4.6902 | -1.8968 | 1.4009  |

**Table S17. Cartesian Coordinates (Å) of Optimized Structure of [2]HA<sub>2</sub> (*P,P<sub>a</sub>,P*) Conformer in Toluene (S<sub>0</sub> State) Calculated by TD-DFT Method at CAM-B3LYP/def2-SVP Level**

| Label | Element | x       | y       | z       | Label | Element | x       | y       | z       |
|-------|---------|---------|---------|---------|-------|---------|---------|---------|---------|
| 1     | C       | 0.7319  | -1.5181 | 0.9865  | 42    | C       | -4.6842 | 0.2136  | -2.4683 |
| 2     | H       | 1.2857  | -0.5879 | 0.9365  | 43    | H       | -5.1675 | 0.0447  | -3.4340 |
| 3     | C       | 4.5411  | 0.1929  | -0.0810 | 44    | C       | -5.1293 | -0.4972 | -1.3479 |
| 4     | C       | 3.5002  | -0.7468 | -0.0077 | 45    | C       | 5.0320  | 0.8639  | 1.0818  |
| 5     | H       | 3.1208  | -0.9809 | 0.9831  | 46    | H       | 4.5850  | 0.6272  | 2.0501  |
| 6     | C       | -0.2048 | -1.6528 | 2.0244  | 47    | C       | -2.4577 | 2.9813  | -3.4198 |
| 7     | C       | 0.3968  | 0.6329  | 3.0301  | 48    | H       | -2.2548 | 3.6371  | -4.2694 |
| 8     | C       | 0.9266  | -2.4893 | 0.0003  | 49    | C       | -1.9210 | -3.0201 | 3.1643  |
| 9     | C       | -0.7319 | 1.5179  | 0.9866  | 50    | H       | -2.5106 | -3.9389 | 3.2032  |
| 10    | H       | -1.2856 | 0.5877  | 0.9365  | 51    | C       | -5.0324 | -0.8635 | 1.0818  |
| 11    | C       | 0.0478  | -3.6308 | 0.0268  | 52    | H       | -4.5855 | -0.6268 | 2.0502  |
| 12    | C       | -0.9933 | -2.8454 | 2.0932  | 53    | C       | -3.3450 | 1.9670  | -3.5277 |
| 13    | C       | -0.9265 | 2.4892  | 0.0005  | 54    | H       | -3.8674 | 1.7731  | -4.4671 |
| 14    | C       | 2.9912  | -1.4005 | -1.1325 | 55    | C       | 6.1695  | 1.4747  | -1.4129 |
| 15    | C       | -1.8851 | 2.3608  | -1.0997 | 56    | H       | 6.6119  | 1.7048  | -2.3852 |
| 16    | C       | 1.8853  | -2.3609 | -1.0998 | 57    | C       | -1.2973 | -0.8566 | 4.0423  |
| 17    | C       | -0.8519 | -3.7958 | 1.0758  | 58    | H       | -1.4358 | -0.0908 | 4.8085  |
| 18    | H       | -1.4945 | -4.6797 | 1.0844  | 59    | C       | 0.8520  | 3.7955  | 1.0761  |
| 19    | C       | -2.9912 | 1.4006  | -1.1324 | 60    | H       | 1.4947  | 4.6794  | 1.0847  |
| 20    | C       | -3.5004 | 0.7469  | -0.0076 | 61    | C       | -2.0622 | -2.0536 | 4.1166  |
| 21    | H       | -3.1210 | 0.9811  | 0.9832  | 62    | H       | -2.7681 | -2.1855 | 4.9395  |
| 22    | C       | -4.5413 | -0.1926 | -0.0809 | 63    | C       | 1.2973  | 0.8561  | 4.0424  |
| 23    | C       | 0.2048  | 1.6525  | 2.0246  | 64    | H       | 1.4358  | 0.0904  | 4.8085  |
| 24    | C       | 3.6690  | -1.1631 | -2.3840 | 65    | C       | 6.0286  | 1.7934  | 0.9839  |
| 25    | C       | 0.8057  | -4.3105 | -2.1637 | 66    | H       | 6.3898  | 2.3056  | 1.8783  |
| 26    | H       | 0.7577  | -4.9693 | -3.0337 | 67    | C       | -6.1697 | -1.4743 | -1.4129 |
| 27    | C       | 1.7213  | -3.2038 | -2.2063 | 68    | H       | -6.6121 | -1.7044 | -2.3853 |
| 28    | C       | 4.6842  | -0.2134 | -2.4683 | 69    | C       | 1.9211  | 3.0197  | 3.1646  |
| 29    | H       | 5.1675  | -0.0445 | -3.4339 | 70    | H       | 2.5106  | 3.9385  | 3.2035  |
| 30    | C       | -0.3967 | -0.6332 | 3.0301  | 71    | C       | -0.8054 | 4.3104  | -2.1635 |
| 31    | C       | 2.4579  | -2.9812 | -3.4200 | 72    | H       | -0.7574 | 4.9692  | -3.0334 |
| 32    | H       | 2.2551  | -3.6371 | -4.2696 | 73    | C       | 2.0623  | 2.0532  | 4.1168  |
| 33    | C       | 5.1291  | 0.4975  | -1.3478 | 74    | H       | 2.7682  | 2.1850  | 4.9397  |
| 34    | C       | 0.0462  | -4.5532 | -1.0719 | 75    | C       | -6.0290 | -1.7929 | 0.9839  |
| 35    | H       | -0.6215 | -5.4164 | -1.0286 | 76    | H       | -6.3904 | -2.3051 | 1.8783  |
| 36    | C       | -3.6689 | 1.1632  | -2.3840 | 77    | C       | 6.6038  | 2.1054  | -0.2816 |
| 37    | C       | 0.9934  | 2.8451  | 2.0934  | 78    | H       | 7.3988  | 2.8522  | -0.3401 |
| 38    | C       | 3.3452  | -1.9669 | -3.5278 | 79    | C       | -0.0460 | 4.5531  | -1.0716 |
| 39    | H       | 3.8677  | -1.7730 | -4.4671 | 80    | H       | 0.6218  | 5.4163  | -1.0283 |
| 40    | C       | -0.0477 | 3.6307  | 0.0270  | 81    | C       | -6.6043 | -2.1049 | -0.2817 |
| 41    | C       | -1.7211 | 3.2038  | -2.2062 | 82    | H       | -7.3993 | -2.8517 | -0.3402 |

**Table S18. Cartesian Coordinates (Å) of Optimized Structure of [2]HA<sub>2</sub> (*P,P<sub>a</sub>,P*) Conformer in Chloroform (S<sub>0</sub> State) Calculated by TD-DFT Method at CAM-B3LYP/def2-SVP Level**

| Label | Element | x       | y       | z       | Label | Element | x       | y       | z       |
|-------|---------|---------|---------|---------|-------|---------|---------|---------|---------|
| 1     | C       | 0.7314  | -1.5171 | 0.9910  | 42    | C       | -4.6775 | 0.2086  | -2.4716 |
| 2     | H       | 1.2881  | -0.5885 | 0.9441  | 43    | H       | -5.1585 | 0.0386  | -3.4383 |
| 3     | C       | 4.5395  | 0.1950  | -0.0827 | 44    | C       | -5.1247 | -0.5010 | -1.3509 |
| 4     | C       | 3.4986  | -0.7447 | -0.0078 | 45    | C       | 5.0334  | 0.8645  | 1.0801  |
| 5     | H       | 3.1217  | -0.9787 | 0.9842  | 46    | H       | 4.5895  | 0.6253  | 2.0494  |
| 6     | C       | -0.2057 | -1.6521 | 2.0288  | 47    | C       | -2.4492 | 2.9757  | -3.4215 |
| 7     | C       | 0.3969  | 0.6329  | 3.0357  | 48    | H       | -2.2445 | 3.6313  | -4.2709 |
| 8     | C       | 0.9236  | -2.4867 | 0.0025  | 49    | C       | -1.9235 | -3.0197 | 3.1673  |
| 9     | C       | -0.7313 | 1.5169  | 0.9911  | 50    | H       | -2.5138 | -3.9383 | 3.2047  |
| 10    | H       | -1.2879 | 0.5883  | 0.9441  | 51    | C       | -5.0339 | -0.8640 | 1.0801  |
| 11    | C       | 0.0434  | -3.6275 | 0.0277  | 52    | H       | -4.5901 | -0.6249 | 2.0495  |
| 12    | C       | -0.9957 | -2.8440 | 2.0960  | 53    | C       | -3.3368 | 1.9614  | -3.5299 |
| 13    | C       | -0.9234 | 2.4866  | 0.0027  | 54    | H       | -3.8581 | 1.7661  | -4.4697 |
| 14    | C       | 2.9872  | -1.3972 | -1.1325 | 55    | C       | 6.1646  | 1.4792  | -1.4178 |
| 15    | C       | -1.8808 | 2.3574  | -1.0989 | 56    | H       | 6.6042  | 1.7102  | -2.3912 |
| 16    | C       | 1.8809  | -2.3575 | -1.0991 | 57    | C       | -1.2974 | -0.8572 | 4.0479  |
| 17    | C       | -0.8560 | -3.7936 | 1.0773  | 58    | H       | -1.4358 | -0.0929 | 4.8155  |
| 18    | H       | -1.4991 | -4.6772 | 1.0852  | 59    | C       | 0.8561  | 3.7933  | 1.0775  |
| 19    | C       | -2.9872 | 1.3973  | -1.1324 | 60    | H       | 1.4993  | 4.6769  | 1.0855  |
| 20    | C       | -3.4988 | 0.7449  | -0.0077 | 61    | C       | -2.0634 | -2.0540 | 4.1209  |
| 21    | H       | -3.1220 | 0.9789  | 0.9843  | 62    | H       | -2.7693 | -2.1859 | 4.9439  |
| 22    | C       | -4.5398 | -0.1947 | -0.0827 | 63    | C       | 1.2974  | 0.8568  | 4.0479  |
| 23    | C       | 0.2058  | 1.6518  | 2.0289  | 64    | H       | 1.4359  | 0.0924  | 4.8155  |
| 24    | C       | 3.6625  | -1.1586 | -2.3855 | 65    | C       | 6.0294  | 1.7949  | 0.9805  |
| 25    | C       | 0.7980  | -4.3053 | -2.1649 | 66    | H       | 6.3931  | 2.3063  | 1.8746  |
| 26    | H       | 0.7489  | -4.9624 | -3.0362 | 67    | C       | -6.1649 | -1.4788 | -1.4179 |
| 27    | C       | 1.7146  | -3.1989 | -2.2066 | 68    | H       | -6.6045 | -1.7098 | -2.3913 |
| 28    | C       | 4.6775  | -0.2084 | -2.4716 | 69    | C       | 1.9236  | 3.0193  | 3.1675  |
| 29    | H       | 5.1586  | -0.0384 | -3.4382 | 70    | H       | 2.5139  | 3.9378  | 3.2050  |
| 30    | C       | -0.3969 | -0.6332 | 3.0356  | 71    | C       | -0.7977 | 4.3052  | -2.1647 |
| 31    | C       | 2.4495  | -2.9757 | -3.4216 | 72    | H       | -0.7486 | 4.9623  | -3.0359 |
| 32    | H       | 2.2449  | -3.6313 | -4.2711 | 73    | C       | 2.0635  | 2.0535  | 4.1210  |
| 33    | C       | 5.1245  | 0.5013  | -1.3509 | 74    | H       | 2.7694  | 2.1853  | 4.9440  |
| 34    | C       | 0.0393  | -4.5487 | -1.0723 | 75    | C       | -6.0300 | -1.7943 | 0.9805  |
| 35    | H       | -0.6295 | -5.4112 | -1.0289 | 76    | H       | -6.3938 | -2.3056 | 1.8745  |
| 36    | C       | -3.6624 | 1.1587  | -2.3854 | 77    | C       | 6.6013  | 2.1090  | -0.2865 |
| 37    | C       | 0.9958  | 2.8436  | 2.0962  | 78    | H       | 7.3956  | 2.8565  | -0.3457 |
| 38    | C       | 3.3370  | -1.9613 | -3.5299 | 79    | C       | -0.0391 | 4.5485  | -1.0721 |
| 39    | H       | 3.8583  | -1.7660 | -4.4697 | 80    | H       | 0.6298  | 5.4110  | -1.0286 |
| 40    | C       | -0.0432 | 3.6273  | 0.0279  | 81    | C       | -6.6017 | -2.1084 | -0.2866 |
| 41    | C       | -1.7144 | 3.1989  | -2.2065 | 82    | H       | -7.3962 | -2.8559 | -0.3458 |



**Table S19. Cartesian Coordinates (Å) of Optimized Structure of [2]HA<sub>2</sub> (*P,P<sub>a</sub>,P*) Conformer in DCM (S<sub>0</sub> State) Calculated by TD-DFT Method at CAM-B3LYP/def2-SVP Level**

| Label | Element | x       | y       | z       | Label | Element | x       | y       | z       |
|-------|---------|---------|---------|---------|-------|---------|---------|---------|---------|
| 1     | C       | 0.7300  | -1.5166 | 0.9945  | 42    | C       | -4.6713 | 0.2061  | -2.4748 |
| 2     | H       | 1.2883  | -0.5889 | 0.9493  | 43    | H       | -5.1507 | 0.0361  | -3.4422 |
| 3     | C       | 4.5363  | 0.1978  | -0.0854 | 44    | C       | -5.1197 | -0.5037 | -1.3545 |
| 4     | C       | 3.4955  | -0.7423 | -0.0087 | 45    | C       | 5.0316  | 0.8674  | 1.0768  |
| 5     | H       | 3.1203  | -0.9754 | 0.9841  | 46    | H       | 4.5895  | 0.6276  | 2.0468  |
| 6     | C       | -0.2070 | -1.6515 | 2.0326  | 47    | C       | -2.4421 | 2.9737  | -3.4218 |
| 7     | C       | 0.3972  | 0.6327  | 3.0403  | 48    | H       | -2.2361 | 3.6296  | -4.2707 |
| 8     | C       | 0.9203  | -2.4853 | 0.0046  | 49    | C       | -1.9254 | -3.0193 | 3.1708  |
| 9     | C       | -0.7298 | 1.5164  | 0.9947  | 50    | H       | -2.5162 | -3.9375 | 3.2075  |
| 10    | H       | -1.2881 | 0.5887  | 0.9494  | 51    | C       | -5.0322 | -0.8669 | 1.0769  |
| 11    | C       | 0.0394  | -3.6256 | 0.0295  | 52    | H       | -4.5902 | -0.6271 | 2.0469  |
| 12    | C       | -0.9979 | -2.8430 | 2.0992  | 53    | C       | -3.3297 | 1.9593  | -3.5312 |
| 13    | C       | -0.9202 | 2.4851  | 0.0048  | 54    | H       | -3.8503 | 1.7637  | -4.4713 |
| 14    | C       | 2.9829  | -1.3952 | -1.1329 | 55    | C       | 6.1591  | 1.4826  | -1.4234 |
| 15    | C       | -1.8764 | 2.3556  | -1.0980 | 56    | H       | 6.5971  | 1.7132  | -2.3976 |
| 16    | C       | 1.8766  | -2.3557 | -1.0981 | 57    | C       | -1.2972 | -0.8576 | 4.0528  |
| 17    | C       | -0.8594 | -3.7922 | 1.0797  | 58    | H       | -1.4351 | -0.0940 | 4.8214  |
| 18    | H       | -1.5028 | -4.6756 | 1.0875  | 59    | C       | 0.8596  | 3.7919  | 1.0800  |
| 19    | C       | -2.9829 | 1.3952  | -1.1328 | 60    | H       | 1.5031  | 4.6752  | 1.0878  |
| 20    | C       | -3.4958 | 0.7426  | -0.0086 | 61    | C       | -2.0641 | -2.0540 | 4.1253  |
| 21    | H       | -3.1206 | 0.9757  | 0.9842  | 62    | H       | -2.7697 | -2.1857 | 4.9485  |
| 22    | C       | -4.5366 | -0.1974 | -0.0854 | 63    | C       | 1.2973  | 0.8570  | 4.0529  |
| 23    | C       | 0.2071  | 1.6512  | 2.0327  | 64    | H       | 1.4352  | 0.0935  | 4.8214  |
| 24    | C       | 3.6565  | -1.1564 | -2.3869 | 65    | C       | 6.0271  | 1.7985  | 0.9755  |
| 25    | C       | 0.7917  | -4.3029 | -2.1642 | 66    | H       | 6.3920  | 2.3103  | 1.8688  |
| 26    | H       | 0.7419  | -4.9592 | -3.0360 | 67    | C       | -6.1594 | -1.4821 | -1.4234 |
| 27    | C       | 1.7088  | -3.1967 | -2.2060 | 68    | H       | -6.5973 | -1.7127 | -2.3977 |
| 28    | C       | 4.6713  | -0.2059 | -2.4748 | 69    | C       | 1.9256  | 3.0188  | 3.1711  |
| 29    | H       | 5.1508  | -0.0359 | -3.4422 | 70    | H       | 2.5163  | 3.9371  | 3.2079  |
| 30    | C       | -0.3971 | -0.6332 | 3.0402  | 71    | C       | -0.7913 | 4.3027  | -2.1640 |
| 31    | C       | 2.4425  | -2.9738 | -3.4219 | 72    | H       | -0.7414 | 4.9590  | -3.0358 |
| 32    | H       | 2.2366  | -3.6297 | -4.2708 | 73    | C       | 2.0642  | 2.0535  | 4.1254  |
| 33    | C       | 5.1194  | 0.5041  | -1.3545 | 74    | H       | 2.7698  | 2.1851  | 4.9487  |
| 34    | C       | 0.0336  | -4.5464 | -1.0710 | 75    | C       | -6.0278 | -1.7978 | 0.9755  |
| 35    | H       | -0.6358 | -5.4084 | -1.0270 | 76    | H       | -6.3929 | -2.3095 | 1.8688  |
| 36    | C       | -3.6564 | 1.1565  | -2.3869 | 77    | C       | 6.5970  | 2.1128  | -0.2926 |
| 37    | C       | 0.9980  | 2.8426  | 2.0995  | 78    | H       | 7.3908  | 2.8608  | -0.3529 |
| 38    | C       | 3.3300  | -1.9593 | -3.5312 | 79    | C       | -0.0333 | 4.5462  | -1.0708 |
| 39    | H       | 3.8506  | -1.7636 | -4.4713 | 80    | H       | 0.6361  | 5.4081  | -1.0267 |
| 40    | C       | -0.0391 | 3.6254  | 0.0298  | 81    | C       | -6.5976 | -2.1121 | -0.2926 |
| 41    | C       | -1.7085 | 3.1966  | -2.2058 | 82    | H       | -7.3915 | -2.8600 | -0.3530 |

**Table S20. Cartesian Coordinates (Å) of Optimized Structure of [2]HA<sub>2</sub> (*M,P<sub>a</sub>,M*) Conformer in Toluene (S<sub>1</sub> State) Calculated by TD-DFT Method at CAM-B3LYP/def2-SVP Level**

| Label | Element | x       | y       | z       | Label | Element | x       | y       | z       |
|-------|---------|---------|---------|---------|-------|---------|---------|---------|---------|
| 1     | C       | 0.8417  | 1.4547  | 3.9477  | 42    | C       | 5.5809  | 0.0183  | -2.0054 |
| 2     | C       | 0.8906  | 2.8758  | 3.9990  | 43    | C       | 4.4546  | 0.8412  | -1.6938 |
| 3     | C       | 0.0780  | 3.6228  | 3.1968  | 44    | C       | 3.3316  | 0.2687  | -0.9736 |
| 4     | C       | -0.8200 | 2.9859  | 2.2880  | 45    | C       | 4.4055  | 2.1601  | -2.1225 |
| 5     | C       | -0.8533 | 1.5573  | 2.2120  | 46    | C       | 3.2551  | 2.9732  | -1.9579 |
| 6     | C       | -0.0029 | 0.7942  | 3.0916  | 47    | C       | 2.1041  | 2.3862  | -1.3514 |
| 7     | C       | -1.7126 | 3.7139  | 1.4926  | 48    | C       | 2.1739  | 1.0470  | -0.8890 |
| 8     | C       | -2.5874 | 3.0944  | 0.6040  | 49    | C       | 3.1923  | 4.3108  | -2.4027 |
| 9     | C       | -2.5455 | 1.6648  | 0.4253  | 50    | C       | 2.0283  | 5.0479  | -2.2611 |
| 10    | C       | -1.7124 | 0.9427  | 1.2854  | 51    | C       | 0.8899  | 4.4671  | -1.6754 |
| 11    | C       | -3.5865 | 3.8660  | -0.0788 | 52    | C       | 0.9257  | 3.1574  | -1.2298 |
| 12    | C       | -4.5246 | 3.2490  | -0.8331 | 53    | H       | 1.4897  | 0.8754  | 4.6093  |
| 13    | C       | -4.4743 | 1.8336  | -1.0785 | 54    | H       | 1.5793  | 3.3610  | 4.6940  |
| 14    | C       | -3.4340 | 1.0506  | -0.5626 | 55    | H       | 0.0970  | 4.7144  | 3.2372  |
| 15    | C       | -5.5196 | 1.2439  | -1.8687 | 56    | H       | -1.7482 | 4.8014  | 1.5958  |
| 16    | C       | -5.5168 | -0.0759 | -2.1648 | 57    | H       | -1.7472 | -0.1421 | 1.2860  |
| 17    | C       | -4.3973 | -0.8976 | -1.8021 | 58    | H       | -3.6028 | 4.9479  | 0.0701  |
| 18    | C       | -3.3078 | -0.3246 | -1.0496 | 59    | H       | -5.3289 | 3.8211  | -1.3012 |
| 19    | C       | -4.3322 | -2.2164 | -2.2458 | 60    | H       | -6.3361 | 1.8889  | -2.2012 |
| 20    | C       | -3.1981 | -3.0113 | -2.0427 | 61    | H       | -6.3342 | -0.5285 | -2.7306 |
| 21    | C       | -2.0715 | -2.4223 | -1.3895 | 62    | H       | -5.1791 | -2.6271 | -2.8015 |
| 22    | C       | -2.1555 | -1.1033 | -0.9158 | 63    | H       | -1.2569 | -0.6877 | -0.4679 |
| 23    | C       | -3.1059 | -4.3616 | -2.5010 | 64    | H       | -3.9722 | -4.8066 | -2.9967 |
| 24    | C       | -1.9551 | -5.0781 | -2.3279 | 65    | H       | -1.8920 | -6.1095 | -2.6822 |
| 25    | C       | -0.8262 | -4.4872 | -1.6896 | 66    | H       | 0.0878  | -5.0716 | -1.5631 |
| 26    | C       | -0.8814 | -3.1989 | -1.2371 | 67    | H       | -0.0194 | -2.7469 | -0.7415 |
| 27    | C       | -0.9514 | -1.3370 | 3.9570  | 68    | H       | -1.6101 | -0.7310 | 4.5827  |
| 28    | C       | -1.0188 | -2.7349 | 4.0277  | 69    | H       | -1.7306 | -3.2094 | 4.7062  |
| 29    | C       | -0.1767 | -3.5109 | 3.2476  | 70    | H       | -0.2105 | -4.6011 | 3.3099  |
| 30    | C       | 0.7442  | -2.9057 | 2.3720  | 71    | H       | 1.6565  | -4.7527 | 1.7049  |
| 31    | C       | 0.8044  | -1.4793 | 2.2792  | 72    | H       | 1.8013  | 0.1885  | 1.3685  |
| 32    | C       | -0.0552 | -0.6983 | 3.1045  | 73    | H       | 3.5715  | -4.9530 | 0.2526  |
| 33    | C       | 1.6607  | -3.6650 | 1.5968  | 74    | H       | 5.3395  | -3.8968 | -1.1261 |
| 34    | C       | 2.5760  | -3.0828 | 0.7335  | 75    | H       | 6.4106  | -1.9549 | -2.0150 |
| 35    | C       | 2.5649  | -1.6452 | 0.5339  | 76    | H       | 6.4090  | 0.4608  | -2.5634 |
| 36    | C       | 1.7230  | -0.8958 | 1.3688  | 77    | H       | 5.2775  | 2.5810  | -2.6300 |
| 37    | C       | 3.5652  | -3.8757 | 0.0722  | 78    | H       | 1.2570  | 0.6171  | -0.4904 |
| 38    | C       | 4.5378  | -3.2919 | -0.6962 | 79    | H       | 4.0745  | 4.7548  | -2.8703 |
| 39    | C       | 4.5338  | -1.9030 | -0.9545 | 80    | H       | 1.9917  | 6.0818  | -2.6111 |
| 40    | C       | 3.4482  | -1.0739 | -0.4503 | 81    | H       | -0.0274 | 5.0505  | -1.5719 |
| 41    | C       | 5.5842  | -1.3163 | -1.6949 | 82    | H       | 0.0430  | 2.7076  | -0.7702 |

**Table S21. Cartesian Coordinates (Å) of Optimized Structure of [2]HA<sub>2</sub> (*M,P<sub>a</sub>,M*) Conformer in Chloroform (S<sub>1</sub> State) Calculated by TD-DFT Method at CAM-B3LYP/def2-SVP Level**

| Label | Element | x       | y       | z       | Label | Element | x       | y       | z       |
|-------|---------|---------|---------|---------|-------|---------|---------|---------|---------|
| 1     | C       | 0.8382  | 1.4557  | 3.9552  | 42    | C       | 5.5731  | 0.0095  | -2.0138 |
| 2     | C       | 0.8854  | 2.8773  | 4.0081  | 43    | C       | 4.4469  | 0.8341  | -1.7020 |
| 3     | C       | 0.0727  | 3.6242  | 3.2055  | 44    | C       | 3.3251  | 0.2643  | -0.9765 |
| 4     | C       | -0.8231 | 2.9866  | 2.2945  | 45    | C       | 4.3989  | 2.1513  | -2.1345 |
| 5     | C       | -0.8542 | 1.5578  | 2.2164  | 46    | C       | 3.2495  | 2.9675  | -1.9674 |
| 6     | C       | -0.0042 | 0.7950  | 3.0968  | 47    | C       | 2.0998  | 2.3840  | -1.3548 |
| 7     | C       | -1.7155 | 3.7152  | 1.4992  | 48    | C       | 2.1685  | 1.0457  | -0.8889 |
| 8     | C       | -2.5885 | 3.0952  | 0.6088  | 49    | C       | 3.1880  | 4.3036  | -2.4154 |
| 9     | C       | -2.5442 | 1.6659  | 0.4280  | 50    | C       | 2.0254  | 5.0442  | -2.2708 |
| 10    | C       | -1.7109 | 0.9433  | 1.2875  | 51    | C       | 0.8882  | 4.4675  | -1.6791 |
| 11    | C       | -3.5878 | 3.8673  | -0.0736 | 52    | C       | 0.9232  | 3.1581  | -1.2304 |
| 12    | C       | -4.5247 | 3.2507  | -0.8302 | 53    | H       | 1.4859  | 0.8773  | 4.6180  |
| 13    | C       | -4.4719 | 1.8355  | -1.0779 | 54    | H       | 1.5723  | 3.3622  | 4.7051  |
| 14    | C       | -3.4313 | 1.0525  | -0.5622 | 55    | H       | 0.0891  | 4.7158  | 3.2471  |
| 15    | C       | -5.5162 | 1.2465  | -1.8709 | 56    | H       | -1.7525 | 4.8025  | 1.6036  |
| 16    | C       | -5.5117 | -0.0728 | -2.1699 | 57    | H       | -1.7422 | -0.1416 | 1.2846  |
| 17    | C       | -4.3914 | -0.8940 | -1.8074 | 58    | H       | -3.6043 | 4.9490  | 0.0773  |
| 18    | C       | -3.3031 | -0.3217 | -1.0522 | 59    | H       | -5.3295 | 3.8219  | -1.2983 |
| 19    | C       | -4.3250 | -2.2119 | -2.2544 | 60    | H       | -6.3324 | 1.8922  | -2.2027 |
| 20    | C       | -3.1899 | -3.0059 | -2.0515 | 61    | H       | -6.3277 | -0.5257 | -2.7376 |
| 21    | C       | -2.0645 | -2.4173 | -1.3955 | 62    | H       | -5.1709 | -2.6220 | -2.8121 |
| 22    | C       | -2.1498 | -1.0994 | -0.9186 | 63    | H       | -1.2516 | -0.6846 | -0.4686 |
| 23    | C       | -3.0964 | -4.3556 | -2.5129 | 64    | H       | -3.9620 | -4.7996 | -3.0107 |
| 24    | C       | -1.9451 | -5.0717 | -2.3396 | 65    | H       | -1.8806 | -6.1024 | -2.6957 |
| 25    | C       | -0.8171 | -4.4812 | -1.6984 | 66    | H       | 0.0968  | -5.0662 | -1.5718 |
| 26    | C       | -0.8737 | -3.1936 | -1.2433 | 67    | H       | -0.0130 | -2.7408 | -0.7458 |
| 27    | C       | -0.9490 | -1.3361 | 3.9664  | 68    | H       | -1.6075 | -0.7301 | 4.5927  |
| 28    | C       | -1.0141 | -2.7339 | 4.0408  | 69    | H       | -1.7236 | -3.2078 | 4.7224  |
| 29    | C       | -0.1718 | -3.5110 | 3.2610  | 70    | H       | -0.2025 | -4.6011 | 3.3263  |
| 30    | C       | 0.7458  | -2.9056 | 2.3822  | 71    | H       | 1.6607  | -4.7536 | 1.7183  |
| 31    | C       | 0.8033  | -1.4796 | 2.2854  | 72    | H       | 1.7930  | 0.1877  | 1.3662  |
| 32    | C       | -0.0554 | -0.6977 | 3.1105  | 73    | H       | 3.5692  | -4.9560 | 0.2620  |
| 33    | C       | 1.6627  | -3.6662 | 1.6071  | 74    | H       | 5.3348  | -3.9012 | -1.1236 |
| 34    | C       | 2.5745  | -3.0843 | 0.7405  | 75    | H       | 6.4028  | -1.9643 | -2.0186 |
| 35    | C       | 2.5610  | -1.6470 | 0.5366  | 76    | H       | 6.3997  | 0.4510  | -2.5751 |
| 36    | C       | 1.7190  | -0.8968 | 1.3710  | 77    | H       | 5.2696  | 2.5693  | -2.6466 |
| 37    | C       | 3.5628  | -3.8791 | 0.0790  | 78    | H       | 1.2515  | 0.6198  | -0.4862 |
| 38    | C       | 4.5334  | -3.2962 | -0.6931 | 79    | H       | 4.0694  | 4.7442  | -2.8876 |
| 39    | C       | 4.5284  | -1.9081 | -0.9544 | 80    | H       | 1.9898  | 6.0774  | -2.6230 |
| 40    | C       | 3.4422  | -1.0766 | -0.4503 | 81    | H       | -0.0271 | 5.0537  | -1.5730 |
| 41    | C       | 5.5774  | -1.3241 | -1.6988 | 82    | H       | 0.0417  | 2.7104  | -0.7661 |

**Table S22. Cartesian Coordinates (Å) of Optimized Structure of [2]HA<sub>2</sub> (*M,P<sub>a</sub>,M*) Conformer in DCM (S<sub>1</sub> State) Calculated by TD-DFT Method at CAM-B3LYP/def2-SVP Level**

| Label | Element | x       | y       | z       | Label | Element | x       | y       | z       |
|-------|---------|---------|---------|---------|-------|---------|---------|---------|---------|
| 1     | C       | 0.8360  | 1.4561  | 3.9596  | 42    | C       | 5.5689  | 0.0057  | -2.0196 |
| 2     | C       | 0.8820  | 2.8778  | 4.0135  | 43    | C       | 4.4430  | 0.8313  | -1.7071 |
| 3     | C       | 0.0694  | 3.6247  | 3.2105  | 44    | C       | 3.3219  | 0.2631  | -0.9783 |
| 4     | C       | -0.8249 | 2.9866  | 2.2981  | 45    | C       | 4.3956  | 2.1476  | -2.1416 |
| 5     | C       | -0.8548 | 1.5578  | 2.2189  | 46    | C       | 3.2469  | 2.9657  | -1.9727 |
| 6     | C       | -0.0050 | 0.7952  | 3.0998  | 47    | C       | 2.0982  | 2.3844  | -1.3562 |
| 7     | C       | -1.7170 | 3.7155  | 1.5026  | 48    | C       | 2.1661  | 1.0466  | -0.8885 |
| 8     | C       | -2.5887 | 3.0953  | 0.6109  | 49    | C       | 3.1862  | 4.3011  | -2.4224 |
| 9     | C       | -2.5433 | 1.6660  | 0.4292  | 50    | C       | 2.0246  | 5.0438  | -2.2756 |
| 10    | C       | -1.7101 | 0.9433  | 1.2886  | 51    | C       | 0.8884  | 4.4695  | -1.6800 |
| 11    | C       | -3.5876 | 3.8677  | -0.0719 | 52    | C       | 0.9228  | 3.1604  | -1.2297 |
| 12    | C       | -4.5237 | 3.2514  | -0.8300 | 53    | H       | 1.4834  | 0.8781  | 4.6231  |
| 13    | C       | -4.4698 | 1.8362  | -1.0787 | 54    | H       | 1.5676  | 3.3627  | 4.7118  |
| 14    | C       | -3.4294 | 1.0531  | -0.5624 | 55    | H       | 0.0842  | 4.7164  | 3.2528  |
| 15    | C       | -5.5133 | 1.2478  | -1.8735 | 56    | H       | -1.7548 | 4.8028  | 1.6075  |
| 16    | C       | -5.5085 | -0.0713 | -2.1736 | 57    | H       | -1.7395 | -0.1417 | 1.2841  |
| 17    | C       | -4.3881 | -0.8926 | -1.8103 | 58    | H       | -3.6042 | 4.9493  | 0.0800  |
| 18    | C       | -3.3006 | -0.3208 | -1.0534 | 59    | H       | -5.3284 | 3.8223  | -1.2987 |
| 19    | C       | -4.3215 | -2.2102 | -2.2585 | 60    | H       | -6.3291 | 1.8941  | -2.2054 |
| 20    | C       | -3.1865 | -3.0044 | -2.0546 | 61    | H       | -6.3236 | -0.5243 | -2.7425 |
| 21    | C       | -2.0618 | -2.4163 | -1.3969 | 62    | H       | -5.1669 | -2.6198 | -2.8173 |
| 22    | C       | -2.1472 | -1.0985 | -0.9190 | 63    | H       | -1.2494 | -0.6845 | -0.4677 |
| 23    | C       | -3.0929 | -4.3539 | -2.5169 | 64    | H       | -3.9581 | -4.7971 | -3.0161 |
| 24    | C       | -1.9418 | -5.0705 | -2.3425 | 65    | H       | -1.8769 | -6.1011 | -2.6990 |
| 25    | C       | -0.8142 | -4.4805 | -1.6994 | 66    | H       | 0.0991  | -5.0663 | -1.5719 |
| 26    | C       | -0.8710 | -3.1929 | -1.2437 | 67    | H       | -0.0111 | -2.7401 | -0.7449 |
| 27    | C       | -0.9473 | -1.3363 | 3.9713  | 68    | H       | -1.6056 | -0.7306 | 4.5982  |
| 28    | C       | -1.0110 | -2.7341 | 4.0472  | 69    | H       | -1.7190 | -3.2079 | 4.7305  |
| 29    | C       | -0.1686 | -3.5113 | 3.2672  | 70    | H       | -0.1976 | -4.6014 | 3.3336  |
| 30    | C       | 0.7469  | -2.9055 | 2.3867  | 71    | H       | 1.6632  | -4.7538 | 1.7236  |
| 31    | C       | 0.8029  | -1.4798 | 2.2882  | 72    | H       | 1.7887  | 0.1877  | 1.3650  |
| 32    | C       | -0.0553 | -0.6977 | 3.1136  | 73    | H       | 3.5676  | -4.9569 | 0.2649  |
| 33    | C       | 1.6639  | -3.6664 | 1.6112  | 74    | H       | 5.3320  | -3.9026 | -1.1242 |
| 34    | C       | 2.5737  | -3.0844 | 0.7428  | 75    | H       | 6.3983  | -1.9685 | -2.0221 |
| 35    | C       | 2.5590  | -1.6473 | 0.5372  | 76    | H       | 6.3946  | 0.4466  | -2.5828 |
| 36    | C       | 1.7169  | -0.8969 | 1.3717  | 77    | H       | 5.2655  | 2.5638  | -2.6566 |
| 37    | C       | 3.5614  | -3.8801 | 0.0809  | 78    | H       | 1.2492  | 0.6230  | -0.4830 |
| 38    | C       | 4.5309  | -3.2976 | -0.6931 | 79    | H       | 4.0671  | 4.7397  | -2.8976 |
| 39    | C       | 4.5254  | -1.9099 | -0.9556 | 80    | H       | 1.9896  | 6.0766  | -2.6291 |
| 40    | C       | 3.4392  | -1.0771 | -0.4510 | 81    | H       | -0.0258 | 5.0574  | -1.5721 |
| 41    | C       | 5.5735  | -1.3273 | -1.7023 | 82    | H       | 0.0422  | 2.7140  | -0.7623 |

**Table S23. Cartesian Coordinates (Å) of Optimized Structure of [2]HA<sub>2</sub> (*P,P<sub>a</sub>,M*) Conformer in Toluene (S<sub>1</sub> State) Calculated by TD-DFT Method at CAM-B3LYP/def2-SVP Level**

| Label | Element | x       | y       | z       | Label | Element | x       | y       | z       |
|-------|---------|---------|---------|---------|-------|---------|---------|---------|---------|
| 1     | C       | 1.4790  | 2.2329  | 2.9565  | 42    | C       | 3.9589  | -2.5786 | -2.8224 |
| 2     | C       | 1.9768  | 3.4953  | 2.5289  | 43    | C       | 4.0606  | -1.3492 | -2.1003 |
| 3     | C       | 1.3435  | 4.1832  | 1.5350  | 44    | C       | 3.4216  | -1.2300 | -0.8019 |
| 4     | C       | 0.1798  | 3.6405  | 0.9116  | 45    | C       | 4.8083  | -0.2955 | -2.6058 |
| 5     | C       | -0.3128 | 2.3603  | 1.3211  | 46    | C       | 5.0522  | 0.8902  | -1.8667 |
| 6     | C       | 0.3666  | 1.6659  | 2.3867  | 47    | C       | 4.5245  | 0.9725  | -0.5430 |
| 7     | C       | -0.5375 | 4.3491  | -0.0587 | 48    | C       | 3.7356  | -0.0969 | -0.0463 |
| 8     | C       | -1.6817 | 3.8309  | -0.6579 | 49    | C       | 5.8219  | 1.9607  | -2.3691 |
| 9     | C       | -2.1215 | 2.4946  | -0.3450 | 50    | C       | 6.0724  | 3.0778  | -1.5899 |
| 10    | C       | -1.4444 | 1.8273  | 0.6806  | 51    | C       | 5.5641  | 3.1556  | -0.2814 |
| 11    | C       | -2.4736 | 4.6562  | -1.5245 | 52    | C       | 4.8047  | 2.1198  | 0.2340  |
| 12    | C       | -3.6615 | 4.2088  | -1.9909 | 53    | H       | 1.9897  | 1.7049  | 3.7651  |
| 13    | C       | -4.0989 | 2.8615  | -1.7481 | 54    | H       | 2.8636  | 3.9114  | 3.0120  |
| 14    | C       | -3.2945 | 1.9605  | -1.0390 | 55    | H       | 1.7078  | 5.1590  | 1.2055  |
| 15    | C       | -5.3824 | 2.4626  | -2.2565 | 56    | H       | -0.2122 | 5.3574  | -0.3272 |
| 16    | C       | -5.8392 | 1.1992  | -2.0987 | 57    | H       | -1.8186 | 0.8753  | 1.0449  |
| 17    | C       | -4.9932 | 0.1895  | -1.5289 | 58    | H       | -2.1219 | 5.6655  | -1.7491 |
| 18    | C       | -3.6811 | 0.5485  | -1.0481 | 59    | H       | -4.3036 | 4.8549  | -2.5940 |
| 19    | C       | -5.4096 | -1.1397 | -1.5188 | 60    | H       | -5.9940 | 3.2196  | -2.7528 |
| 20    | C       | -4.5625 | -2.1777 | -1.1134 | 61    | H       | -6.8318 | 0.9099  | -2.4510 |
| 21    | C       | -3.2253 | -1.8459 | -0.7328 | 62    | H       | -6.4145 | -1.3793 | -1.8760 |
| 22    | C       | -2.8231 | -0.5009 | -0.7105 | 63    | H       | -1.7843 | -0.3043 | -0.4584 |
| 23    | C       | -4.9636 | -3.5492 | -1.1117 | 64    | H       | -5.9887 | -3.7952 | -1.3998 |
| 24    | C       | -4.0804 | -4.5322 | -0.7633 | 65    | H       | -4.3947 | -5.5784 | -0.7660 |
| 25    | C       | -2.7418 | -4.2041 | -0.3999 | 66    | H       | -2.0454 | -5.0015 | -0.1312 |
| 26    | C       | -2.3268 | -2.9021 | -0.3871 | 67    | H       | -1.3036 | -2.6476 | -0.1031 |
| 27    | C       | -1.0133 | 0.3801  | 4.0047  | 68    | H       | -1.3345 | 1.3409  | 4.4124  |
| 28    | C       | -1.4724 | -0.8092 | 4.5862  | 69    | H       | -2.1532 | -0.7679 | 5.4389  |
| 29    | C       | -1.0611 | -2.0319 | 4.0811  | 70    | H       | -1.4180 | -2.9645 | 4.5243  |
| 30    | C       | -0.1864 | -2.0909 | 2.9799  | 71    | H       | -0.1641 | -4.2510 | 2.8405  |
| 31    | C       | 0.2842  | -0.8810 | 2.3787  | 72    | H       | 1.4393  | -0.0401 | 0.7777  |
| 32    | C       | -0.1436 | 0.3663  | 2.9178  | 73    | H       | 0.8923  | -5.5582 | 1.1216  |
| 33    | C       | 0.2238  | -3.3245 | 2.4092  | 74    | H       | 2.1801  | -5.6819 | -0.9935 |
| 34    | C       | 1.0639  | -3.4007 | 1.3096  | 75    | H       | 3.3299  | -4.6243 | -2.7975 |
| 35    | C       | 1.6249  | -2.1876 | 0.7433  | 76    | H       | 4.4602  | -2.6558 | -3.7897 |
| 36    | C       | 1.1608  | -0.9708 | 1.2658  | 77    | H       | 5.2481  | -0.3928 | -3.6018 |
| 37    | C       | 1.3345  | -4.6589 | 0.6870  | 78    | H       | 3.4038  | -0.0245 | 0.9879  |
| 38    | C       | 2.0543  | -4.7277 | -0.4768 | 79    | H       | 6.2265  | 1.8911  | -3.3818 |
| 39    | C       | 2.6508  | -3.5775 | -1.0387 | 80    | H       | 6.6709  | 3.8990  | -1.9900 |
| 40    | C       | 2.5629  | -2.2998 | -0.3451 | 81    | H       | 5.7694  | 4.0373  | 0.3295  |
| 41    | C       | 3.3266  | -3.6642 | -2.2764 | 82    | H       | 4.4008  | 2.1819  | 1.2468  |

**Table S24. Cartesian Coordinates (Å) of Optimized Structure of [2]HA<sub>2</sub> (*P,P<sub>a</sub>,M*) Conformer in Chloroform (S<sub>1</sub> State) Calculated by TD-DFT Method at CAM-B3LYP/def2-SVP Level**

| Label | Element | x       | y       | z       | Label | Element | x       | y       | z       |
|-------|---------|---------|---------|---------|-------|---------|---------|---------|---------|
| 1     | C       | 1.4823  | 2.2322  | 2.9415  | 42    | C       | 3.9801  | -2.5774 | -2.8217 |
| 2     | C       | 1.9785  | 3.4951  | 2.5118  | 43    | C       | 4.0819  | -1.3484 | -2.0970 |
| 3     | C       | 1.3400  | 4.1844  | 1.5221  | 44    | C       | 3.4375  | -1.2290 | -0.8005 |
| 4     | C       | 0.1728  | 3.6416  | 0.9042  | 45    | C       | 4.8330  | -0.2962 | -2.5995 |
| 5     | C       | -0.3178 | 2.3611  | 1.3153  | 46    | C       | 5.0756  | 0.8901  | -1.8584 |
| 6     | C       | 0.3667  | 1.6659  | 2.3774  | 47    | C       | 4.5429  | 0.9726  | -0.5366 |
| 7     | C       | -0.5483 | 4.3508  | -0.0631 | 48    | C       | 3.7496  | -0.0954 | -0.0433 |
| 8     | C       | -1.6945 | 3.8317  | -0.6585 | 49    | C       | 5.8484  | 1.9592  | -2.3579 |
| 9     | C       | -2.1325 | 2.4950  | -0.3445 | 50    | C       | 6.0978  | 3.0765  | -1.5769 |
| 10    | C       | -1.4515 | 1.8276  | 0.6786  | 51    | C       | 5.5857  | 3.1544  | -0.2702 |
| 11    | C       | -2.4888 | 4.6573  | -1.5230 | 52    | C       | 4.8227  | 2.1190  | 0.2426  |
| 12    | C       | -3.6776 | 4.2092  | -1.9876 | 53    | H       | 1.9986  | 1.7040  | 3.7463  |
| 13    | C       | -4.1132 | 2.8611  | -1.7439 | 54    | H       | 2.8688  | 3.9094  | 2.9901  |
| 14    | C       | -3.3076 | 1.9604  | -1.0356 | 55    | H       | 1.7021  | 5.1605  | 1.1909  |
| 15    | C       | -5.3977 | 2.4623  | -2.2514 | 56    | H       | -0.2245 | 5.3593  | -0.3327 |
| 16    | C       | -5.8544 | 1.1988  | -2.0930 | 57    | H       | -1.8226 | 0.8745  | 1.0431  |
| 17    | C       | -5.0076 | 0.1895  | -1.5227 | 58    | H       | -2.1376 | 5.6669  | -1.7474 |
| 18    | C       | -3.6948 | 0.5483  | -1.0429 | 59    | H       | -4.3220 | 4.8544  | -2.5891 |
| 19    | C       | -5.4256 | -1.1395 | -1.5107 | 60    | H       | -6.0089 | 3.2198  | -2.7473 |
| 20    | C       | -4.5790 | -2.1774 | -1.1031 | 61    | H       | -6.8471 | 0.9084  | -2.4440 |
| 21    | C       | -3.2414 | -1.8460 | -0.7230 | 62    | H       | -6.4310 | -1.3784 | -1.8670 |
| 22    | C       | -2.8374 | -0.5014 | -0.7035 | 63    | H       | -1.7986 | -0.3064 | -0.4507 |
| 23    | C       | -4.9822 | -3.5487 | -1.0983 | 64    | H       | -6.0076 | -3.7934 | -1.3862 |
| 24    | C       | -4.1002 | -4.5320 | -0.7464 | 65    | H       | -4.4154 | -5.5779 | -0.7458 |
| 25    | C       | -2.7610 | -4.2044 | -0.3829 | 66    | H       | -2.0667 | -5.0027 | -0.1110 |
| 26    | C       | -2.3440 | -2.9027 | -0.3739 | 67    | H       | -1.3206 | -2.6478 | -0.0902 |
| 27    | C       | -1.0162 | 0.3783  | 3.9923  | 68    | H       | -1.3399 | 1.3385  | 4.3998  |
| 28    | C       | -1.4771 | -0.8116 | 4.5712  | 69    | H       | -2.1607 | -0.7712 | 5.4218  |
| 29    | C       | -1.0640 | -2.0344 | 4.0661  | 70    | H       | -1.4220 | -2.9677 | 4.5069  |
| 30    | C       | -0.1854 | -2.0915 | 2.9681  | 71    | H       | -0.1646 | -4.2523 | 2.8249  |
| 31    | C       | 0.2882  | -0.8812 | 2.3707  | 72    | H       | 1.4539  | -0.0383 | 0.7782  |
| 32    | C       | -0.1420 | 0.3656  | 2.9086  | 73    | H       | 0.8935  | -5.5571 | 1.1072  |
| 33    | C       | 0.2257  | -3.3254 | 2.3966  | 74    | H       | 2.1882  | -5.6789 | -1.0050 |
| 34    | C       | 1.0689  | -3.3998 | 1.2995  | 75    | H       | 3.3456  | -4.6219 | -2.8020 |
| 35    | C       | 1.6342  | -2.1863 | 0.7376  | 76    | H       | 4.4853  | -2.6538 | -3.7871 |
| 36    | C       | 1.1707  | -0.9699 | 1.2616  | 77    | H       | 5.2770  | -0.3938 | -3.5937 |
| 37    | C       | 1.3392  | -4.6580 | 0.6755  | 78    | H       | 3.4138  | -0.0209 | 0.9895  |
| 38    | C       | 2.0625  | -4.7256 | -0.4865 | 79    | H       | 6.2564  | 1.8889  | -3.3692 |
| 39    | C       | 2.6627  | -3.5756 | -1.0446 | 80    | H       | 6.6990  | 3.8969  | -1.9749 |
| 40    | C       | 2.5757  | -2.2974 | -0.3483 | 81    | H       | 5.7906  | 4.0353  | 0.3422  |
| 41    | C       | 3.3426  | -3.6623 | -2.2800 | 82    | H       | 4.4170  | 2.1802  | 1.2549  |

**Table S25. Cartesian Coordinates (Å) of Optimized Structure of [2]HA<sub>2</sub> (*P,P<sub>a</sub>,M*) Conformer in DCM (S<sub>1</sub> State) Calculated by TD-DFT Method at CAM-B3LYP/def2-SVP Level**

| Label | Element | x       | y       | z       | Label | Element | x       | y       | z       |
|-------|---------|---------|---------|---------|-------|---------|---------|---------|---------|
| 1     | C       | 1.4824  | 2.2322  | 2.9379  | 42    | C       | 3.9878  | -2.5783 | -2.8205 |
| 2     | C       | 1.9779  | 3.4953  | 2.5079  | 43    | C       | 4.0898  | -1.3488 | -2.0954 |
| 3     | C       | 1.3379  | 4.1850  | 1.5192  | 44    | C       | 3.4440  | -1.2288 | -0.7994 |
| 4     | C       | 0.1699  | 3.6419  | 0.9028  | 45    | C       | 4.8418  | -0.2977 | -2.5981 |
| 5     | C       | -0.3199 | 2.3610  | 1.3139  | 46    | C       | 5.0838  | 0.8897  | -1.8571 |
| 6     | C       | 0.3661  | 1.6658  | 2.3752  | 47    | C       | 4.5499  | 0.9732  | -0.5359 |
| 7     | C       | -0.5523 | 4.3515  | -0.0636 | 48    | C       | 3.7555  | -0.0941 | -0.0424 |
| 8     | C       | -1.6990 | 3.8321  | -0.6580 | 49    | C       | 5.8572  | 1.9580  | -2.3568 |
| 9     | C       | -2.1365 | 2.4951  | -0.3441 | 50    | C       | 6.1063  | 3.0761  | -1.5760 |
| 10    | C       | -1.4541 | 1.8273  | 0.6779  | 51    | C       | 5.5934  | 3.1550  | -0.2697 |
| 11    | C       | -2.4942 | 4.6582  | -1.5216 | 52    | C       | 4.8296  | 2.1200  | 0.2432  |
| 12    | C       | -3.6833 | 4.2102  | -1.9856 | 53    | H       | 2.0005  | 1.7039  | 3.7417  |
| 13    | C       | -4.1185 | 2.8618  | -1.7420 | 54    | H       | 2.8691  | 3.9092  | 2.9849  |
| 14    | C       | -3.3124 | 1.9607  | -1.0345 | 55    | H       | 1.6991  | 5.1614  | 1.1879  |
| 15    | C       | -5.4035 | 2.4635  | -2.2492 | 56    | H       | -0.2290 | 5.3602  | -0.3331 |
| 16    | C       | -5.8605 | 1.1999  | -2.0910 | 57    | H       | -1.8238 | 0.8734  | 1.0418  |
| 17    | C       | -5.0135 | 0.1903  | -1.5212 | 58    | H       | -2.1431 | 5.6680  | -1.7456 |
| 18    | C       | -3.7002 | 0.5485  | -1.0418 | 59    | H       | -4.3285 | 4.8554  | -2.5863 |
| 19    | C       | -5.4324 | -1.1385 | -1.5092 | 60    | H       | -6.0146 | 3.2216  | -2.7445 |
| 20    | C       | -4.5861 | -2.1768 | -1.1017 | 61    | H       | -6.8535 | 0.9096  | -2.4416 |
| 21    | C       | -3.2480 | -1.8462 | -0.7220 | 62    | H       | -6.4381 | -1.3768 | -1.8651 |
| 22    | C       | -2.8432 | -0.5017 | -0.7025 | 63    | H       | -1.8043 | -0.3076 | -0.4492 |
| 23    | C       | -4.9904 | -3.5479 | -1.0964 | 64    | H       | -6.0161 | -3.7917 | -1.3842 |
| 24    | C       | -4.1089 | -4.5318 | -0.7442 | 65    | H       | -4.4248 | -5.5775 | -0.7431 |
| 25    | C       | -2.7692 | -4.2050 | -0.3812 | 66    | H       | -2.0758 | -5.0040 | -0.1087 |
| 26    | C       | -2.3512 | -2.9035 | -0.3728 | 67    | H       | -1.3275 | -2.6489 | -0.0896 |
| 27    | C       | -1.0175 | 0.3770  | 3.9890  | 68    | H       | -1.3425 | 1.3368  | 4.3965  |
| 28    | C       | -1.4785 | -0.8132 | 4.5672  | 69    | H       | -2.1632 | -0.7732 | 5.4170  |
| 29    | C       | -1.0642 | -2.0360 | 4.0624  | 70    | H       | -1.4220 | -2.9697 | 4.5026  |
| 30    | C       | -0.1839 | -2.0921 | 2.9657  | 71    | H       | -0.1621 | -4.2535 | 2.8219  |
| 31    | C       | 0.2901  | -0.8817 | 2.3694  | 72    | H       | 1.4597  | -0.0376 | 0.7805  |
| 32    | C       | -0.1417 | 0.3650  | 2.9064  | 73    | H       | 0.8971  | -5.5572 | 1.1059  |
| 33    | C       | 0.2285  | -3.3263 | 2.3945  | 74    | H       | 2.1937  | -5.6785 | -1.0061 |
| 34    | C       | 1.0729  | -3.3997 | 1.2984  | 75    | H       | 3.3517  | -4.6226 | -2.8012 |
| 35    | C       | 1.6391  | -2.1860 | 0.7378  | 76    | H       | 4.4940  | -2.6545 | -3.7855 |
| 36    | C       | 1.1751  | -0.9697 | 1.2621  | 77    | H       | 5.2870  | -0.3962 | -3.5917 |
| 37    | C       | 1.3436  | -4.6582 | 0.6746  | 78    | H       | 3.4190  | -0.0178 | 0.9900  |
| 38    | C       | 2.0676  | -4.7254 | -0.4872 | 79    | H       | 6.2661  | 1.8867  | -3.3677 |
| 39    | C       | 2.6683  | -3.5755 | -1.0445 | 80    | H       | 6.7080  | 3.8962  | -1.9741 |
| 40    | C       | 2.5816  | -2.2966 | -0.3476 | 81    | H       | 5.7984  | 4.0361  | 0.3423  |
| 41    | C       | 3.3490  | -3.6627 | -2.2795 | 82    | H       | 4.4239  | 2.1813  | 1.2556  |

**Table S26. Cartesian Coordinates (Å) of Optimized Structure of [2]HA<sub>2</sub> (*P,P<sub>a</sub>,P*) Conformer in Toluene (S<sub>1</sub> State) Calculated by TD-DFT Method at CAM-B3LYP/def2-SVP Level**

| Label | Element | x       | y       | z       | Label | Element | x       | y       | z       |
|-------|---------|---------|---------|---------|-------|---------|---------|---------|---------|
| 1     | C       | 0.8283  | -1.5155 | 0.8187  | 42    | C       | -5.0525 | 0.3450  | -2.2914 |
| 2     | H       | 1.3698  | -0.5759 | 0.7575  | 43    | H       | -5.6188 | 0.2089  | -3.2164 |
| 3     | C       | 4.7284  | 0.0665  | 0.0966  | 44    | C       | -5.4031 | -0.4001 | -1.1597 |
| 4     | C       | 3.6770  | -0.8864 | 0.0837  | 45    | C       | 5.1248  | 0.7269  | 1.2818  |
| 5     | H       | 3.2315  | -1.1400 | 1.0437  | 46    | H       | 4.6061  | 0.4935  | 2.2145  |
| 6     | C       | -0.1461 | -1.6383 | 1.8399  | 47    | C       | -2.9076 | 3.1409  | -3.3421 |
| 7     | C       | 0.4282  | 0.6428  | 2.8177  | 48    | H       | -2.7772 | 3.8246  | -4.1840 |
| 8     | C       | 1.0797  | -2.5119 | -0.1360 | 49    | C       | -1.8856 | -2.9954 | 2.9181  |
| 9     | C       | -0.8232 | 1.5532  | 0.8636  | 50    | H       | -2.4854 | -3.9081 | 2.9424  |
| 10    | H       | -1.3634 | 0.6138  | 0.8251  | 51    | C       | -5.0945 | -0.8490 | 1.2386  |
| 11    | C       | 0.1906  | -3.6581 | -0.1363 | 52    | H       | -4.5592 | -0.6487 | 2.1698  |
| 12    | C       | -0.9348 | -2.8308 | 1.8934  | 53    | C       | -3.8019 | 2.1285  | -3.4063 |
| 13    | C       | -1.0996 | 2.5508  | -0.0756 | 54    | H       | -4.4034 | 1.9631  | -4.3029 |
| 14    | C       | 3.2377  | -1.5237 | -1.0792 | 55    | C       | 6.4392  | 1.3307  | -1.1155 |
| 15    | C       | -2.1410 | 2.4478  | -1.0995 | 56    | H       | 6.9576  | 1.5567  | -2.0505 |
| 16    | C       | 2.1140  | -2.4329 | -1.1341 | 57    | C       | -1.3016 | -0.8337 | 3.8240  |
| 17    | C       | -0.7456 | -3.8031 | 0.8748  | 58    | H       | -1.4525 | -0.0569 | 4.5765  |
| 18    | H       | -1.3811 | -4.6924 | 0.8807  | 59    | C       | 0.7361  | 3.8508  | 0.9102  |
| 19    | C       | -3.2451 | 1.4854  | -1.0691 | 60    | H       | 1.3687  | 4.7419  | 0.8980  |
| 20    | C       | -3.6565 | 0.7941  | 0.0733  | 61    | C       | -2.0609 | -2.0108 | 3.8780  |
| 21    | H       | -3.1916 | 0.9928  | 1.0350  | 62    | H       | -2.7956 | -2.1453 | 4.6747  |
| 22    | C       | -4.7044 | -0.1405 | 0.0597  | 63    | C       | 1.3799  | 0.8527  | 3.7847  |
| 23    | C       | 0.1739  | 1.6789  | 1.8446  | 64    | H       | 1.5618  | 0.0744  | 4.5291  |
| 24    | C       | 4.0105  | -1.2905 | -2.2858 | 65    | C       | 6.1420  | 1.6656  | 1.2622  |
| 25    | C       | 1.1087  | -4.4021 | -2.2659 | 66    | H       | 6.4345  | 2.1714  | 2.1848  |
| 26    | H       | 1.0938  | -5.0810 | -3.1217 | 67    | C       | -6.4531 | -1.3693 | -1.1653 |
| 27    | C       | 2.0201  | -3.3216 | -2.2833 | 68    | H       | -6.9807 | -1.5639 | -2.1023 |
| 28    | C       | 5.0258  | -0.3438 | -2.2879 | 69    | C       | 1.9395  | 3.0383  | 2.9126  |
| 29    | H       | 5.5689  | -0.1571 | -3.2181 | 70    | H       | 2.5241  | 3.9608  | 2.9361  |
| 30    | C       | -0.3600 | -0.6235 | 2.8200  | 71    | C       | -1.1612 | 4.4386  | -2.1839 |
| 31    | C       | 2.8302  | -3.0959 | -3.4175 | 72    | H       | -1.1863 | 5.1235  | -3.0345 |
| 32    | H       | 2.7015  | -3.7490 | -4.2836 | 73    | C       | 2.1409  | 2.0542  | 3.8369  |
| 33    | C       | 5.4052  | 0.3703  | -1.1230 | 74    | H       | 2.8908  | 2.1768  | 4.6214  |
| 34    | C       | 0.2610  | -4.6010 | -1.2095 | 75    | C       | -6.1039 | -1.7696 | 1.1985  |
| 35    | H       | -0.4289 | -5.4479 | -1.2016 | 76    | H       | -6.3892 | -2.3103 | 2.1037  |
| 36    | C       | -4.0286 | 1.2890  | -2.2647 | 77    | C       | 6.8006  | 1.9708  | 0.0582  |
| 37    | C       | 0.9520  | 2.8785  | 1.8940  | 78    | H       | 7.6030  | 2.7117  | 0.0504  |
| 38    | C       | 3.7519  | -2.0813 | -3.4470 | 79    | C       | -0.3203 | 4.6553  | -1.1472 |
| 39    | H       | 4.3564  | -1.9062 | -4.3397 | 80    | H       | 0.3425  | 5.5232  | -1.1285 |
| 40    | C       | -0.2326 | 3.7020  | -0.0784 | 81    | C       | -6.7920 | -2.0351 | -0.0212 |
| 41    | C       | -2.0723 | 3.3271  | -2.1877 | 82    | H       | -7.5956 | -2.7748 | -0.0337 |



**Table S27. Cartesian Coordinates (Å) of Optimized Structure of [2]HA<sub>2</sub> (*P,P<sub>a</sub>,P*) Conformer in Chloroform (S<sub>1</sub> State) Calculated by TD-DFT Method at CAM-B3LYP/def2-SVP Level**

| Label | Element | x       | y       | z       | Label | Element | x       | y       | z       |
|-------|---------|---------|---------|---------|-------|---------|---------|---------|---------|
| 1     | C       | 0.8229  | -1.5563 | 0.8614  | 42    | C       | -5.0237 | 0.3631  | -2.2843 |
| 2     | H       | 1.3687  | -0.6199 | 0.8288  | 43    | H       | -5.5663 | 0.1834  | -3.2162 |
| 3     | C       | 4.7107  | 0.1245  | 0.0489  | 44    | C       | -5.4029 | -0.3614 | -1.1243 |
| 4     | C       | 3.6579  | -0.8048 | 0.0624  | 45    | C       | 5.1118  | 0.8223  | 1.2310  |
| 5     | H       | 3.1972  | -1.0064 | 1.0257  | 46    | H       | 4.5822  | 0.6163  | 2.1644  |
| 6     | C       | -0.1730 | -1.6833 | 1.8439  | 47    | C       | -2.8294 | 3.1245  | -3.3934 |
| 7     | C       | 0.3682  | 0.6140  | 2.8282  | 48    | H       | -2.7007 | 3.7842  | -4.2546 |
| 8     | C       | 1.0911  | -2.5491 | -0.0855 | 49    | C       | -1.9416 | -3.0426 | 2.9089  |
| 9     | C       | -0.8268 | 1.5186  | 0.8360  | 50    | H       | -2.5292 | -3.9634 | 2.9283  |
| 10    | H       | -1.3720 | 0.5813  | 0.7749  | 51    | C       | -5.1240 | -0.7360 | 1.2781  |
| 11    | C       | 0.2193  | -3.6968 | -0.0924 | 52    | H       | -4.6075 | -0.5075 | 2.2135  |
| 12    | C       | -0.9556 | -2.8803 | 1.8886  | 53    | C       | -3.7513 | 2.1099  | -3.4300 |
| 13    | C       | -1.0784 | 2.5193  | -0.1148 | 54    | H       | -4.3561 | 1.9401  | -4.3236 |
| 14    | C       | 3.2372  | -1.4866 | -1.0827 | 55    | C       | 6.4586  | 1.3537  | -1.1784 |
| 15    | C       | -2.1138 | 2.4454  | -1.1128 | 56    | H       | 6.9812  | 1.5520  | -2.1174 |
| 16    | C       | 2.1286  | -2.4440 | -1.1139 | 57    | C       | -1.3725 | -0.8629 | 3.7908  |
| 17    | C       | -0.7467 | -3.8483 | 0.8988  | 58    | H       | -1.5513 | -0.0880 | 4.5395  |
| 18    | H       | -1.3826 | -4.7370 | 0.8837  | 59    | C       | 0.7524  | 3.8034  | 0.8972  |
| 19    | C       | -3.2367 | 1.5355  | -1.0646 | 60    | H       | 1.3893  | 4.6917  | 0.9057  |
| 20    | C       | -3.6757 | 0.8872  | 0.0934  | 61    | C       | -2.1374 | -2.0625 | 3.8387  |
| 21    | H       | -3.2314 | 1.1316  | 1.0565  | 62    | H       | -2.8862 | -2.1860 | 4.6243  |
| 22    | C       | -4.7270 | -0.0665 | 0.0980  | 63    | C       | 1.3145  | 0.8175  | 3.8294  |
| 23    | C       | 0.1526  | 1.6342  | 1.8540  | 64    | H       | 1.4675  | 0.0371  | 4.5777  |
| 24    | C       | 4.0153  | -1.2860 | -2.2815 | 65    | C       | 6.1254  | 1.7387  | 1.1912  |
| 25    | C       | 1.1348  | -4.4239 | -2.2074 | 66    | H       | 6.4192  | 2.2714  | 2.0984  |
| 26    | H       | 1.1535  | -5.1027 | -3.0630 | 67    | C       | -6.4353 | -1.3229 | -1.1258 |
| 27    | C       | 2.0505  | -3.3158 | -2.2077 | 68    | H       | -6.9524 | -1.5419 | -2.0633 |
| 28    | C       | 5.0436  | -0.3464 | -2.3081 | 69    | C       | 1.8992  | 2.9830  | 2.9317  |
| 29    | H       | 5.6053  | -0.2067 | -3.2354 | 70    | H       | 2.5005  | 3.8947  | 2.9579  |
| 30    | C       | -0.4222 | -0.6511 | 2.8226  | 71    | C       | -1.1088 | 4.4231  | -2.2345 |
| 31    | C       | 2.8807  | -3.1259 | -3.3657 | 72    | H       | -1.0958 | 5.1071  | -3.0862 |
| 32    | H       | 2.7423  | -3.8041 | -4.2108 | 73    | C       | 2.0765  | 1.9929  | 3.8861  |
| 33    | C       | 5.4037  | 0.3893  | -1.1729 | 74    | H       | 2.8150  | 2.1215  | 4.6803  |
| 34    | C       | 0.2979  | -4.6440 | -1.1677 | 75    | C       | -6.1404 | -1.6763 | 1.2502  |
| 35    | H       | -0.3687 | -5.5091 | -1.1508 | 76    | H       | -6.4335 | -2.1893 | 2.1688  |
| 36    | C       | -4.0095 | 1.3106  | -2.2736 | 77    | C       | 6.8073  | 2.0100  | -0.0313 |
| 37    | C       | 0.9438  | 2.8245  | 1.9105  | 78    | H       | 7.6142  | 2.7463  | -0.0432 |
| 38    | C       | 3.7791  | -2.1168 | -3.4280 | 79    | C       | -0.2593 | 4.6154  | -1.1782 |
| 39    | H       | 4.3770  | -1.9473 | -4.3263 | 80    | H       | 0.4310  | 5.4620  | -1.1652 |
| 40    | C       | -0.1873 | 3.6646  | -0.1109 | 81    | C       | -6.7970 | -1.9732 | 0.0434  |
| 41    | C       | -2.0197 | 3.3424  | -2.2578 | 82    | H       | -7.5983 | -2.7153 | 0.0290  |

**Table S28. Cartesian Coordinates (Å) of Optimized Structure of [2]HA<sub>2</sub> (*P,P<sub>a</sub>,P*) Conformer in DCM (S<sub>1</sub> State) Calculated by TD-DFT Method at CAM-B3LYP/def2-SVP Level**

| Label | Element | x       | y       | z       | Label | Element | x       | y       | z       |
|-------|---------|---------|---------|---------|-------|---------|---------|---------|---------|
| 1     | C       | 0.8247  | -1.5587 | 0.8651  | 42    | C       | -5.0241 | 0.3689  | -2.2876 |
| 2     | H       | 1.3716  | -0.6229 | 0.8332  | 43    | H       | -5.5667 | 0.1923  | -3.2200 |
| 3     | C       | 4.7101  | 0.1266  | 0.0450  | 44    | C       | -5.4036 | -0.3596 | -1.1293 |
| 4     | C       | 3.6584  | -0.8042 | 0.0617  | 45    | C       | 5.1115  | 0.8274  | 1.2255  |
| 5     | H       | 3.1992  | -1.0038 | 1.0261  | 46    | H       | 4.5838  | 0.6216  | 2.1601  |
| 6     | C       | -0.1721 | -1.6845 | 1.8470  | 47    | C       | -2.8291 | 3.1321  | -3.3898 |
| 7     | C       | 0.3695  | 0.6132  | 2.8302  | 48    | H       | -2.6997 | 3.7938  | -4.2495 |
| 8     | C       | 1.0929  | -2.5521 | -0.0812 | 49    | C       | -1.9432 | -3.0423 | 2.9111  |
| 9     | C       | -0.8278 | 1.5201  | 0.8402  | 50    | H       | -2.5309 | -3.9630 | 2.9303  |
| 10    | H       | -1.3745 | 0.5836  | 0.7808  | 51    | C       | -5.1255 | -0.7412 | 1.2722  |
| 11    | C       | 0.2212  | -3.7001 | -0.0871 | 52    | H       | -4.6099 | -0.5149 | 2.2087  |
| 12    | C       | -0.9554 | -2.8812 | 1.8919  | 53    | C       | -3.7515 | 2.1180  | -3.4285 |
| 13    | C       | -1.0791 | 2.5211  | -0.1106 | 54    | H       | -4.3565 | 1.9498  | -4.3223 |
| 14    | C       | 3.2378  | -1.4890 | -1.0818 | 55    | C       | 6.4547  | 1.3564  | -1.1872 |
| 15    | C       | -2.1146 | 2.4478  | -1.1091 | 56    | H       | 6.9757  | 1.5533  | -2.1274 |
| 16    | C       | 2.1301  | -2.4479 | -1.1104 | 57    | C       | -1.3739 | -0.8616 | 3.7915  |
| 17    | C       | -0.7457 | -3.8506 | 0.9037  | 58    | H       | -1.5538 | -0.0863 | 4.5395  |
| 18    | H       | -1.3813 | -4.7396 | 0.8892  | 59    | C       | 0.7537  | 3.8039  | 0.9007  |
| 19    | C       | -3.2370 | 1.5378  | -1.0635 | 60    | H       | 1.3910  | 4.6920  | 0.9092  |
| 20    | C       | -3.6763 | 0.8852  | 0.0929  | 61    | C       | -2.1399 | -2.0608 | 3.8395  |
| 21    | H       | -3.2328 | 1.1257  | 1.0572  | 62    | H       | -2.8901 | -2.1827 | 4.6239  |
| 22    | C       | -4.7280 | -0.0683 | 0.0940  | 63    | C       | 1.3177  | 0.8151  | 3.8300  |
| 23    | C       | 0.1535  | 1.6342  | 1.8570  | 64    | H       | 1.4714  | 0.0342  | 4.5778  |
| 24    | C       | 4.0147  | -1.2900 | -2.2817 | 65    | C       | 6.1234  | 1.7457  | 1.1823  |
| 25    | C       | 1.1375  | -4.4309 | -2.2006 | 66    | H       | 6.4175  | 2.2809  | 2.0880  |
| 26    | H       | 1.1572  | -5.1109 | -3.0553 | 67    | C       | -6.4359 | -1.3208 | -1.1343 |
| 27    | C       | 2.0524  | -3.3218 | -2.2026 | 68    | H       | -6.9526 | -1.5368 | -2.0727 |
| 28    | C       | 5.0417  | -0.3488 | -2.3117 | 69    | C       | 1.9030  | 2.9808  | 2.9328  |
| 29    | H       | 5.6021  | -0.2103 | -3.2398 | 70    | H       | 2.5049  | 3.8922  | 2.9586  |
| 30    | C       | -0.4220 | -0.6514 | 2.8247  | 71    | C       | -1.1091 | 4.4280  | -2.2287 |
| 31    | C       | 2.8820  | -3.1337 | -3.3616 | 72    | H       | -1.0966 | 5.1133  | -3.0795 |
| 32    | H       | 2.7436  | -3.8143 | -4.2049 | 73    | C       | 2.0809  | 1.9897  | 3.8863  |
| 33    | C       | 5.4015  | 0.3899  | -1.1782 | 74    | H       | 2.8209  | 2.1169  | 4.6793  |
| 34    | C       | 0.3004  | -4.6495 | -1.1607 | 75    | C       | -6.1421 | -1.6818 | 1.2411  |
| 35    | H       | -0.3660 | -5.5148 | -1.1420 | 76    | H       | -6.4356 | -2.1973 | 2.1581  |
| 36    | C       | -4.0100 | 1.3162  | -2.2733 | 77    | C       | 6.8034  | 2.0159  | -0.0417 |
| 37    | C       | 0.9458  | 2.8236  | 1.9131  | 78    | H       | 7.6089  | 2.7538  | -0.0559 |
| 38    | C       | 3.7792  | -2.1236 | -3.4266 | 79    | C       | -0.2593 | 4.6190  | -1.1721 |
| 39    | H       | 4.3767  | -1.9549 | -4.3254 | 80    | H       | 0.4310  | 5.4655  | -1.1576 |
| 40    | C       | -0.1874 | 3.6662  | -0.1063 | 81    | C       | -6.7981 | -1.9750 | 0.0332  |
| 41    | C       | -2.0197 | 3.3473  | -2.2535 | 82    | H       | -7.5994 | -2.7172 | 0.0160  |
